# Supplementary material for: Organic transformations in the confined space of porous organic cage CC2; catalysis or inhibition
Source: Royal Society of Chemistry journal article supplement (doi:10.1039/d2ra03399b), 2022-01-01
Supplement: d2ra03399b1.pdf [file d2ra03399b1.pdf]

**Organic transformations in the confined space of porous organic cage CC2; Catalysis or inhibition**

*Ayesha Mukhtar, Sehrish Sarfaraz, & Khurshid Ayub\**

Department of Chemistry, COMSATS University, Abbottabad Campus, KPK, Pakistan 22060

\*Corresponding author.

Tel: +92-992-383591.

E-mail: [khurshid@cuiatd.edu.pk](mailto:khurshid@cuiatd.edu.pk) (K.A.)

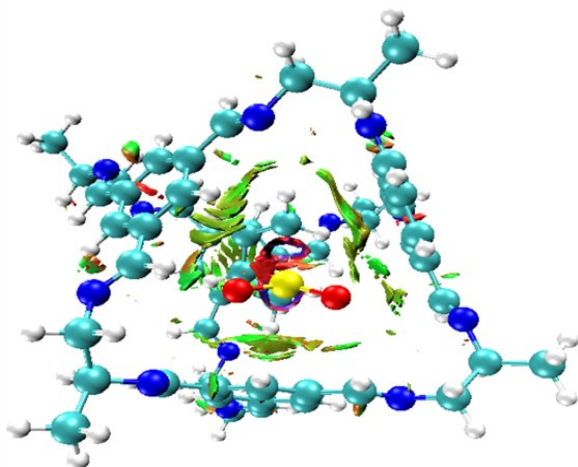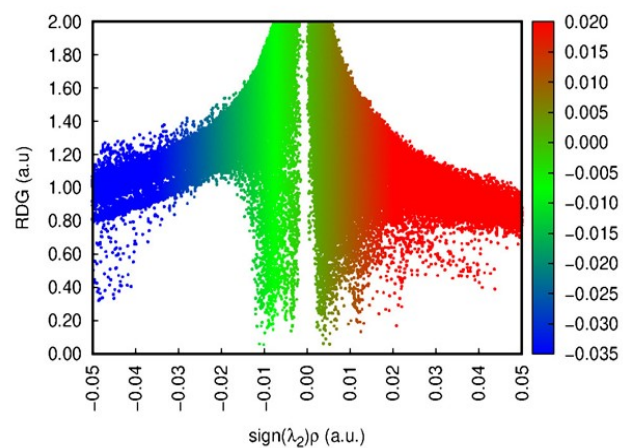

(a) TS2'

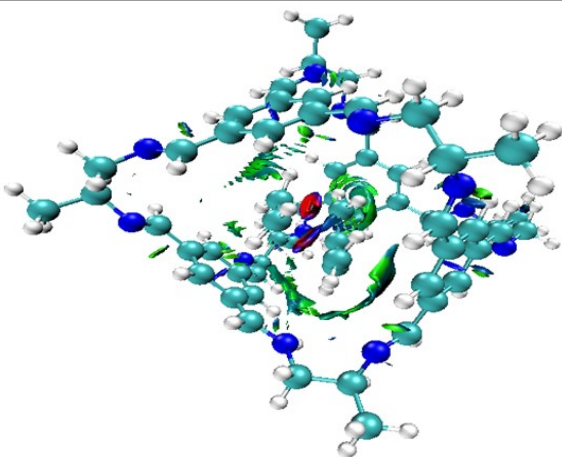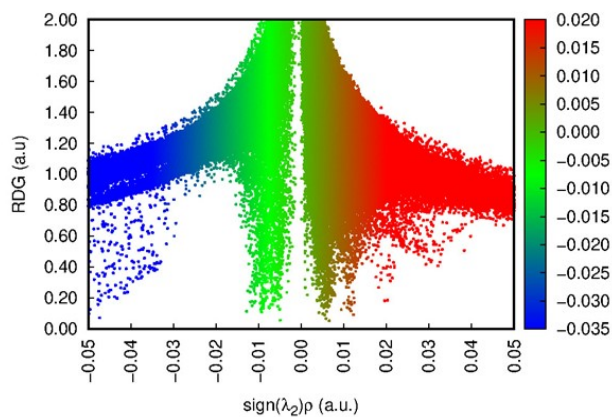

(b) TS3'

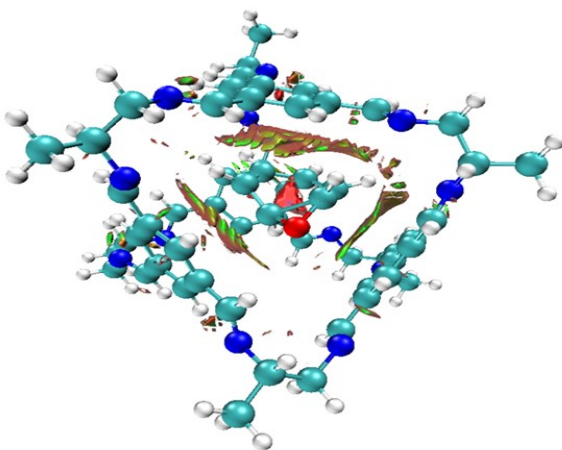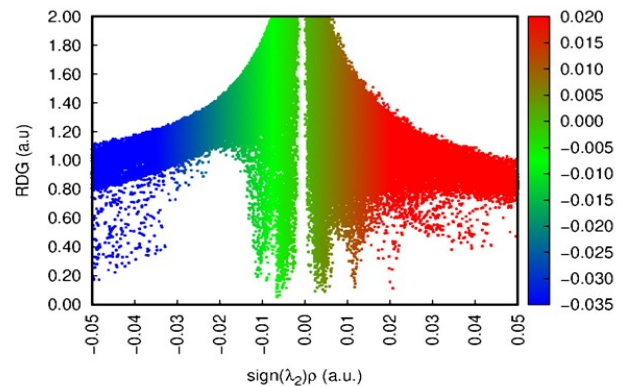

(c) TS4'

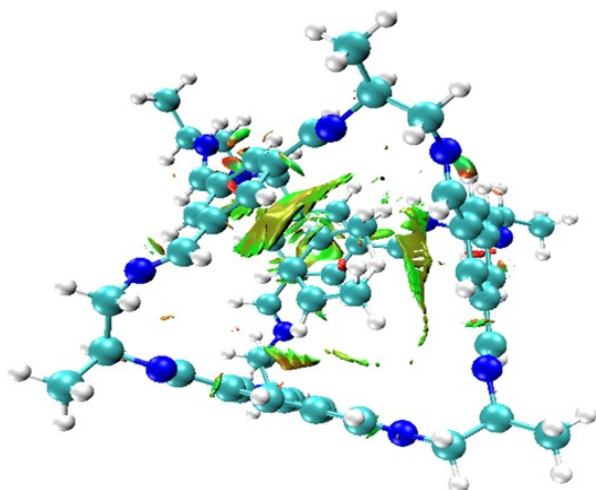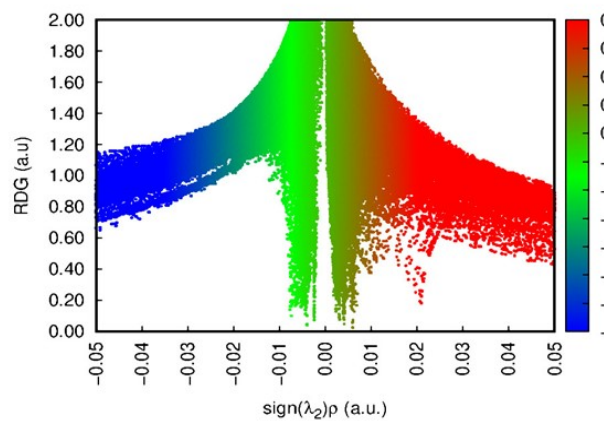

(d) TS5'

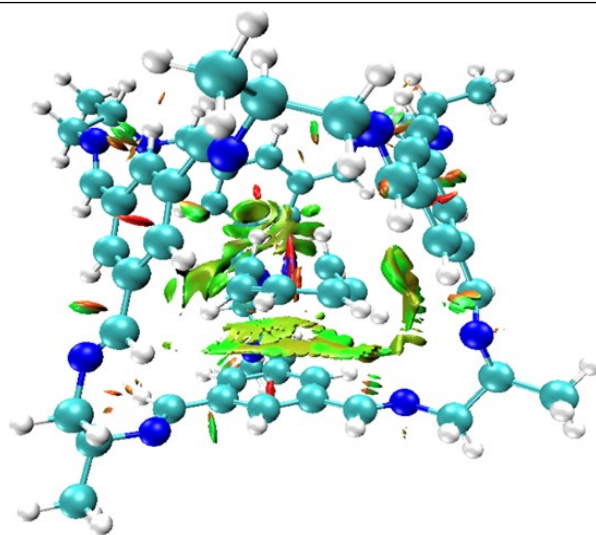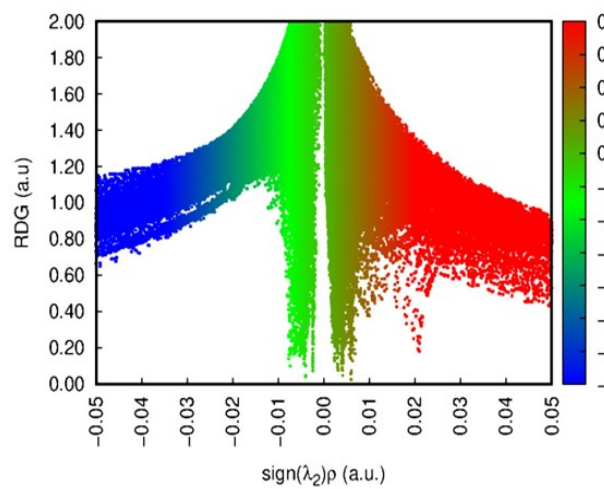

(e) TS6'

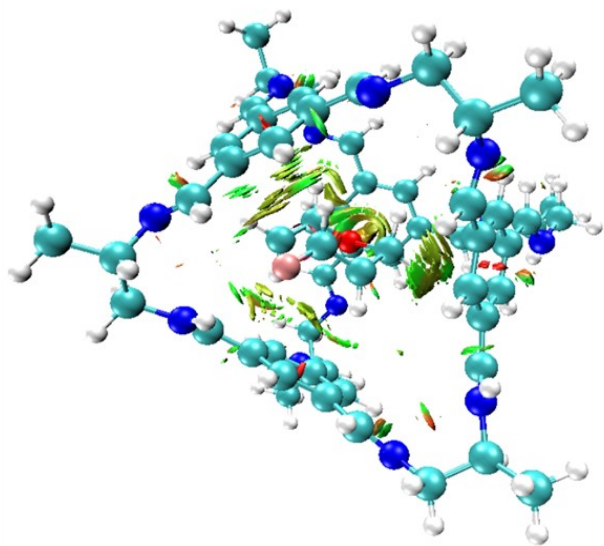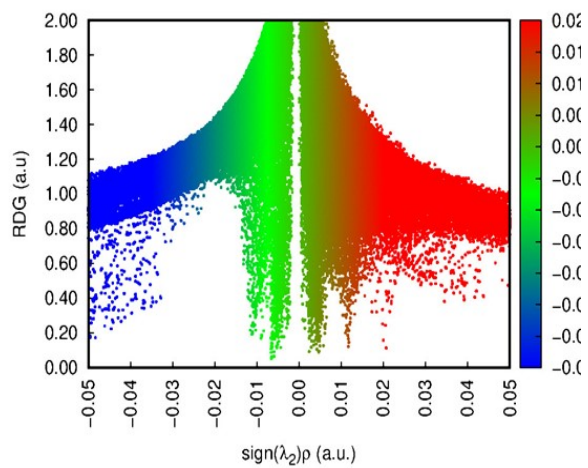

**(f) TS7'**

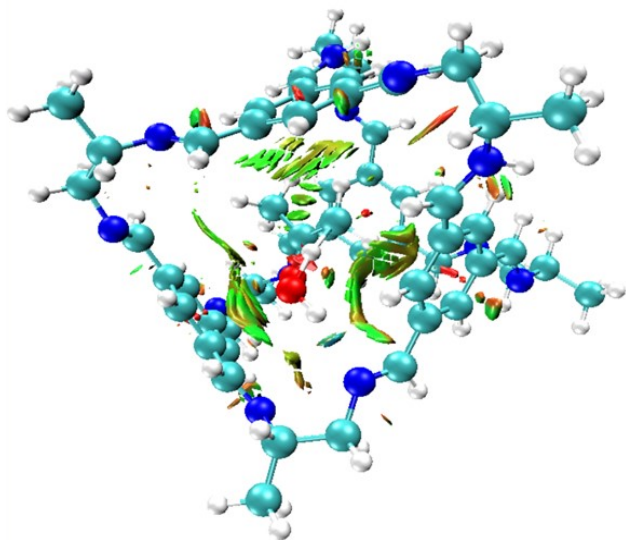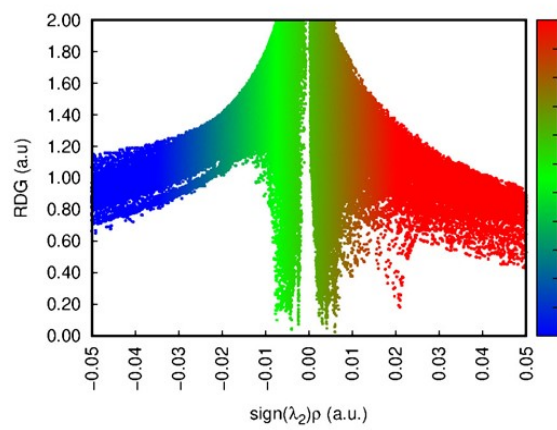

**(g) TS8'**

---

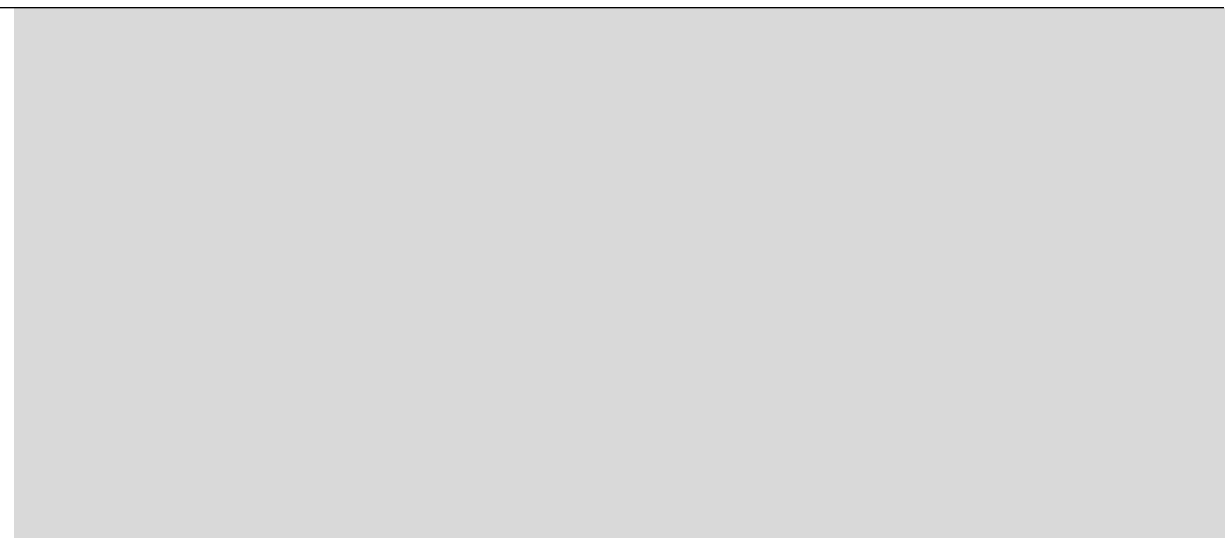

(h) TS9'

**Figure S1:** 3D-isosurfaces and 2D-RDG graphs at M06-2X of transition states inside CC2 cage: where (a) Cheletropic reaction, (b) Dyotropic reaction, (c) Ring-expansion and contraction reaction, (d) 1,5-Sigmatropic shift reaction, (e) 6- $\pi$  electron cyclization reaction, (f) Claisen rearrangement reaction, (g) Keto-enol tautomerism reaction and (h) [2+4] cycloaddition reaction.

**Table S1:** Energies of reactants, products and transition states (TS) with and without CC2 cage in a.u.

| Organic Transformation         | Without CC2 cage |         |         | With CC2 cage |          |          |
|--------------------------------|------------------|---------|---------|---------------|----------|----------|
|                                | Reactant         | TS      | Product | Reactant      | TS       | Product  |
| Trimerization reaction         | -231.87          | -231.79 | -232.14 | -2981.55      | -2981.47 | -2981.81 |
| Cheletropic reaction           | -704.40          | -704.37 | -704.42 | -3454.10      | -3454.06 | -3454.10 |
| Dyotropic reaction             | -998.91          | -998.82 | -998.91 | -3748.58      | -3748.50 | -3748.59 |
| Ring-expansion and contraction | -307.20          | -307.16 | -307.18 | -3056.88      | -3056.83 | -3056.86 |
| 1,5-Sigmatropic shift          | -195.19          | -195.14 | -195.20 | -2944.91      | -2944.81 | -2944.89 |
| 6- $\pi$ electron cyclization  | -233.25          | -233.22 | -233.30 | -2982.93      | -2982.90 | -2982.98 |
| Claisen rearrangement          | -270.40          | -270.32 | -270.37 | -3020.08      | -3019.99 | -3020.05 |
| [2+4] cycloaddition            | -234.44          | -234.41 | -234.52 | -2984.12      | -2984.08 | -2984.20 |

## Cartesian coordinates for all computed structures

### 1. Trimerization Reaction

#### Without CC2 cage

##### Reactant

0 1

|   |             |             |             |
|---|-------------|-------------|-------------|
| C | -1.83745000 | 0.88200100  | 0.00127200  |
| C | -2.88744200 | 0.29340500  | -0.00079800 |
| C | 0.15479100  | -2.03219000 | 0.00004100  |
| C | 1.18970800  | -2.64689600 | 0.00111600  |
| C | 1.68247700  | 1.15003500  | -0.00302500 |
| C | 1.69792100  | 2.35365000  | 0.00130300  |
| H | -0.89401000 | 1.39049000  | 0.00310000  |
| H | -3.82580800 | -0.21573900 | -0.00259900 |
| H | -0.75754800 | -1.46975800 | -0.00036100 |
| H | 2.10004300  | -3.20461100 | 0.00217000  |
| H | 1.65100400  | 0.07872000  | -0.00687500 |
| H | 1.72628700  | 3.42085800  | 0.00510700  |

##### TS

0 1

|   |             |             |             |
|---|-------------|-------------|-------------|
| C | 0.75841800  | 1.61722300  | -0.00047500 |
| C | -0.46218000 | 1.72541900  | 0.00034200  |
| C | -1.78000700 | -0.15179700 | 0.00015700  |
| C | -1.26360300 | -1.26306100 | -0.00050100 |
| C | 1.02177900  | -1.46548800 | 0.00041600  |
| C | 1.72553600  | -0.46233500 | 0.00006000  |

|   |             |             |             |
|---|-------------|-------------|-------------|
| H | 1.75883500  | 1.98753100  | -0.00134600 |
| H | -1.38189400 | 2.26589700  | 0.00108900  |
| H | -2.60079600 | 0.52957200  | 0.00060500  |
| H | -1.27122400 | -2.32978100 | -0.00131400 |
| H | 0.84199200  | -2.51696700 | 0.00104800  |
| H | 2.65342200  | 0.06398000  | -0.00008400 |

**Product**

0 1

|   |             |             |             |
|---|-------------|-------------|-------------|
| C | -0.59734600 | 1.25840200  | -0.00036000 |
| C | 0.79118300  | 1.14642100  | 0.00039500  |
| C | 1.38853000  | -0.11187800 | 0.00026100  |
| C | 0.59733900  | -1.25837300 | -0.00029400 |
| C | -0.79120600 | -1.14650800 | 0.00010400  |
| C | -1.38852900 | 0.11193100  | -0.00010600 |
| H | -1.06279600 | 2.23931200  | -0.00059000 |
| H | 1.40789100  | 2.04024900  | 0.00035800  |
| H | 2.47080200  | -0.19910600 | -0.00016500 |
| H | 1.06308700  | -2.23944700 | -0.00087100 |
| H | -1.40784100 | -2.04009800 | 0.00076300  |
| H | -2.47097100 | 0.19912600  | 0.00051600  |

**With CC2 cage**

**Reactant**

0 1

|   |             |             |             |
|---|-------------|-------------|-------------|
| N | -1.42660300 | 4.87470800  | -2.25383800 |
| N | 4.85574300  | -0.04139300 | -3.29898900 |

|   |             |             |             |
|---|-------------|-------------|-------------|
| N | 2.00424500  | 4.50984500  | 3.14075400  |
| N | 3.73665600  | -4.43521300 | 1.26255100  |
| N | 2.30692500  | -3.84826900 | 3.71928800  |
| N | 4.68015400  | 2.74267500  | -2.45670500 |
| N | -0.26583800 | -3.95205400 | -3.73261000 |
| C | 0.93143700  | 4.46552300  | 0.48928900  |
| H | 0.29262800  | 4.81389400  | 1.29639700  |
| C | 3.55511300  | -4.58043300 | 3.66981900  |
| H | 4.43559000  | -3.92310600 | 3.75811600  |
| N | -3.60640400 | -1.37908900 | 4.23723100  |
| C | 3.46492100  | 3.05565200  | -2.63688100 |
| H | 2.98927000  | 3.00009800  | -3.62847500 |
| N | 1.54951600  | 2.36016300  | 5.04401200  |
| C | 2.59705500  | 3.53122100  | -1.54299300 |
| C | 2.68820600  | 4.00465800  | 2.20003100  |
| H | 3.68056700  | 3.55951100  | 2.37317200  |
| C | 2.21182200  | 3.99487400  | 0.80301500  |
| C | -0.88441400 | 4.94181600  | -1.10685700 |
| H | -1.41873500 | 5.36854300  | -0.24398900 |
| C | -2.57411500 | -2.01992100 | 3.87534700  |
| H | -2.62399500 | -3.06388400 | 3.52947500  |
| C | 3.03713900  | 3.52544300  | -0.21319100 |
| H | 4.03587300  | 3.15363700  | 0.00159200  |
| C | 1.32452700  | 4.00409300  | -1.84212700 |
| H | 0.97769500  | 4.03019000  | -2.87142300 |



|   |             |             |             |
|---|-------------|-------------|-------------|
| C | 0.48002000  | 4.46369200  | -0.82471400 |
| C | 1.78003600  | -3.74572000 | -1.72549700 |
| H | 1.05636500  | -4.55124700 | -1.63178600 |
| C | 4.72854400  | -0.70958500 | -2.22944000 |
| H | 5.42566600  | -0.59381000 | -1.38479200 |
| C | 1.70595400  | -2.89685000 | -2.83868200 |
| C | -0.10673400 | -2.24570000 | 3.76936800  |
| H | -0.21738300 | -3.30072300 | 3.53257900  |
| C | 0.65390500  | -3.08503200 | -3.85658800 |
| H | 0.72561200  | -2.43766200 | -4.74420900 |
| C | -1.22014000 | -1.43220100 | 3.94730200  |
| C | 3.71472900  | -2.55339800 | -0.93056400 |
| H | 4.49021200  | -2.43862600 | -0.17743800 |
| C | 2.37937200  | -2.58626200 | 3.81448200  |
| H | 3.34651300  | -2.06161800 | 3.86235000  |
| C | -1.04354600 | -0.07704800 | 4.26268500  |
| H | -1.92628600 | 0.54148400  | 4.40674100  |
| C | 5.42820900  | 2.29490200  | -3.61174900 |
| H | 4.82661100  | 2.29885200  | -4.53537300 |
| C | 0.41050000  | 1.87114000  | 4.77791300  |
| H | -0.51099900 | 2.47306300  | 4.82622100  |
| C | 2.65482600  | -1.89275900 | -2.99582900 |
| H | 2.63165000  | -1.22870700 | -3.85630400 |
| C | 2.56436400  | 4.48146100  | 4.47372900  |
| H | 3.55244000  | 3.99404600  | 4.51103500  |

|   |             |             |             |
|---|-------------|-------------|-------------|
| C | 3.66548100  | -5.37661900 | 2.36628200  |
| H | 2.77271600  | -6.01865300 | 2.28623500  |
| C | -1.19004400 | -4.11309300 | -4.83852200 |
| H | -1.08009500 | -3.32043600 | -5.59573300 |
| C | 1.18604100  | -1.72349800 | 3.91861400  |
| N | -3.90054400 | 3.27020700  | -2.22345500 |
| C | 2.80909200  | -4.47516400 | 0.39966700  |
| H | 1.97842100  | -5.19451200 | 0.47099500  |
| C | 2.76780800  | -3.57271300 | -0.76641600 |
| C | 5.97372900  | 0.88300900  | -3.38355400 |
| H | 6.55380300  | 0.89353800  | -2.44590000 |
| C | 0.23474000  | 0.45168300  | 4.40565700  |
| C | 1.34970700  | -0.37915500 | 4.22710400  |
| H | 2.34053900  | 0.04857200  | 4.35595700  |
| C | 3.67162800  | -1.72385200 | -2.04464400 |
| C | 1.61836000  | 3.75691300  | 5.43525800  |
| H | 0.62993000  | 4.24040500  | 5.36760900  |
| C | -2.75763500 | 5.44866200  | -2.39282900 |
| H | -3.17930500 | 5.70014900  | -1.40591500 |
| N | -5.43663200 | -1.43475600 | 1.93696900  |
| C | -3.68977600 | 4.43825000  | -3.05785600 |
| H | -3.29175100 | 4.17509400  | -4.05199600 |
| N | -3.00140300 | -2.84691200 | -3.83440400 |
| C | -4.74317200 | -0.35557800 | -0.09475600 |
| C | -3.87077100 | 2.13750700  | -2.79806100 |

|   |             |             |             |
|---|-------------|-------------|-------------|
| H | -3.64957800 | 2.03865700  | -3.87150200 |
| C | -4.87637400 | -2.07309000 | 4.20051000  |
| H | -4.78387800 | -3.11067500 | 3.84037800  |
| C | -4.57702800 | 0.85226900  | -0.76478100 |
| H | -4.80465000 | 1.79476800  | -0.27230700 |
| C | -3.96248200 | -1.54274600 | -2.05526800 |
| C | -5.88244400 | -1.33365800 | 3.31437300  |
| H | -5.92184200 | -0.28359100 | 3.64841500  |
| C | -3.80734500 | -0.32542600 | -2.72410000 |
| H | -3.41109800 | -0.32953500 | -3.73600200 |
| C | -4.43883900 | -1.55410200 | -0.74970100 |
| H | -4.54640800 | -2.48667100 | -0.20201400 |
| C | -4.10401400 | 0.87180100  | -2.08244600 |
| C | -2.64229100 | -4.15074800 | -4.36384100 |
| H | -2.72960900 | -4.93332000 | -3.59106500 |
| C | -3.54636100 | -2.80654700 | -2.68987900 |
| H | -3.71871800 | -3.71750300 | -2.09403200 |
| C | -5.20309200 | -0.35962800 | 1.30720600  |
| H | -5.32632500 | 0.63017900  | 1.77379500  |
| C | -2.65188900 | 6.71358900  | -3.24389800 |
| H | -2.21869200 | 6.47519600  | -4.22008400 |
| H | -3.63846100 | 7.16211200  | -3.39562500 |
| H | -2.00623300 | 7.44821900  | -2.75588700 |
| C | -3.57304500 | -4.47592700 | -5.53153300 |
| H | -3.50064200 | -3.69776700 | -6.29737200 |

|   |             |             |             |
|---|-------------|-------------|-------------|
| H | -3.31179000 | -5.43938200 | -5.97994200 |
| H | -4.61025500 | -4.52036600 | -5.18945500 |
| C | 4.92618700  | -6.23719100 | 2.36684200  |
| H | 5.81414900  | -5.60330300 | 2.44907700  |
| H | 4.91414200  | -6.94046600 | 3.20512700  |
| H | 5.00013500  | -6.80612500 | 1.43643600  |
| C | 2.14036000  | 3.83892600  | 6.86801000  |
| H | 3.12056200  | 3.35813200  | 6.93941400  |
| H | 2.23350200  | 4.88201500  | 7.18529900  |
| H | 1.45952600  | 3.32624800  | 7.55243600  |
| C | 6.87177200  | 0.45962500  | -4.54366700 |
| H | 6.30097300  | 0.45070300  | -5.47702800 |
| H | 7.71517800  | 1.14861500  | -4.65066700 |
| H | 7.26345900  | -0.54691400 | -4.37538900 |
| H | 6.28062300  | 2.97169500  | -3.74948800 |
| H | -4.66239800 | 4.92694100  | -3.20211100 |
| H | 3.56600600  | -5.28970300 | 4.50652400  |
| H | -0.96539200 | -5.07621600 | -5.31530700 |
| H | 2.67460100  | 5.51717400  | 4.81849700  |
| H | -5.27290700 | -2.09492300 | 5.22336500  |
| C | -7.26640000 | -1.96853600 | 3.43076800  |
| H | -7.62576400 | -1.92714900 | 4.46351500  |
| H | -7.98130900 | -1.44360900 | 2.79188100  |
| H | -7.22851600 | -3.01408300 | 3.11036900  |
| C | -0.79409400 | 1.73985400  | -3.02428000 |

|   |             |             |             |
|---|-------------|-------------|-------------|
| C | -0.67761200 | 0.55134000  | -2.85995700 |
| C | -1.03230300 | -2.52735600 | -0.78998000 |
| C | -1.15699900 | -1.50495400 | -0.16416000 |
| C | -1.15637000 | 1.96002400  | 1.27902000  |
| C | -1.87092200 | 2.27543000  | 0.36142300  |
| H | -0.92942300 | 2.79973800  | -3.13245100 |
| H | -0.59982300 | -0.49973500 | -2.66971200 |
| H | -0.93954100 | -3.40357700 | -1.39914000 |
| H | -1.28349500 | -0.57775200 | 0.35855600  |
| H | -0.49996500 | 1.67283500  | 2.07240500  |
| H | -2.49238400 | 2.58847000  | -0.45651300 |

**TS**

0 1

|   |             |             |             |
|---|-------------|-------------|-------------|
| N | 0.45635100  | -2.42238900 | -4.94992700 |
| N | -5.18547300 | 2.19711200  | -1.58038800 |
| N | -2.11522200 | -5.50245300 | 0.03798100  |
| N | -2.73138100 | 2.75092200  | 4.32777000  |
| N | -1.13196300 | 0.70497500  | 5.63127700  |
| N | -5.25156200 | -0.53242700 | -2.62359300 |
| N | 0.24771500  | 5.53551000  | -0.59701400 |
| C | -1.42882000 | -3.83704100 | -2.18295000 |
| H | -0.75101800 | -4.64320900 | -1.91519500 |
| C | -2.25161600 | 1.37433400  | 6.25755400  |
| H | -3.20758000 | 0.85254200  | 6.08845400  |
| N | 4.39230400  | -1.68648500 | 3.42902700  |

|   |             |             |             |
|---|-------------|-------------|-------------|
| C | -4.12784500 | -0.69083600 | -3.18902400 |
| H | -3.79438000 | -0.04193100 | -4.01392800 |
| N | -1.07103300 | -4.97707500 | 2.70658900  |
| C | -3.19282000 | -1.76824600 | -2.81370600 |
| C | -2.82686400 | -4.48563000 | -0.22102800 |
| H | -3.68834700 | -4.20064600 | 0.40299900  |
| C | -2.55937100 | -3.62020700 | -1.38593900 |
| C | 0.04779700  | -3.24393000 | -4.07105300 |
| H | 0.60473400  | -4.16588500 | -3.83987600 |
| C | 3.41696800  | -0.94750200 | 3.75839900  |
| H | 3.56093900  | 0.07283300  | 4.14616400  |
| C | -3.43472500 | -2.58785100 | -1.70345100 |
| H | -4.32241400 | -2.40185100 | -1.10413500 |
| C | -2.06305500 | -1.98659600 | -3.59205000 |
| H | -1.85677300 | -1.35983700 | -4.45607500 |
| C | -1.17316000 | -3.02151900 | -3.27767900 |
| C | -1.36247300 | 4.01785000  | 1.20781000  |
| H | -0.48952800 | 4.53433200  | 1.59840800  |
| C | -4.79677000 | 2.04957000  | -0.38301900 |
| H | -5.35439400 | 1.43237800  | 0.33845600  |
| C | -1.63549800 | 4.10897100  | -0.16492800 |
| C | 1.01010000  | -0.64460500 | 4.26313600  |
| H | 1.23417600  | 0.30875000  | 4.73497600  |
| C | -0.75544000 | 4.90228400  | -1.04650400 |
| H | -1.02888600 | 4.92096900  | -2.11402600 |

|   |             |             |             |
|---|-------------|-------------|-------------|
| C | 2.01686300  | -1.41410800 | 3.69032100  |
| C | -3.31198600 | 2.63410200  | 1.50675600  |
| H | -3.95740400 | 2.07261700  | 2.17729600  |
| C | -1.38217600 | -0.31940700 | 4.92817800  |
| H | -2.40549800 | -0.70463500 | 4.79967100  |
| C | 1.69583200  | -2.64840500 | 3.10436100  |
| H | 2.49811300  | -3.24196300 | 2.67271100  |
| C | -6.09055000 | 0.54434200  | -3.10490000 |
| H | -5.63194500 | 1.10020500  | -3.93909900 |
| C | 0.06568700  | -4.43931200 | 2.54788300  |
| H | 0.88631400  | -4.94721000 | 2.01793800  |
| C | -2.74737400 | 3.45980800  | -0.68799700 |
| H | -2.98994800 | 3.52266200  | -1.74651600 |
| C | -2.45341100 | -6.28330700 | 1.20666300  |
| H | -3.34030300 | -5.89832400 | 1.73629300  |
| C | -2.37508300 | 2.80842000  | 5.73439200  |
| H | -1.40221800 | 3.30609600  | 5.88088900  |
| C | 1.03369300  | 6.31618600  | -1.52787000 |
| H | 0.73120200  | 6.15778500  | -2.57577900 |
| C | -0.31711300 | -1.09707200 | 4.26421700  |
| N | 3.05834700  | -1.19774200 | -4.42194100 |
| C | -1.92264200 | 3.25950100  | 3.49435600  |
| H | -0.97862300 | 3.72985600  | 3.81040000  |
| C | -2.19766400 | 3.29250100  | 2.04501200  |
| C | -6.41224600 | 1.52683600  | -1.97588800 |

|   |             |             |             |
|---|-------------|-------------|-------------|
| H | -6.83914300 | 0.94976800  | -1.13896500 |
| C | 0.38253400  | -3.10667600 | 3.10372200  |
| C | -0.62437700 | -2.31933000 | 3.68030700  |
| H | -1.64285800 | -2.69856000 | 3.67815100  |
| C | -3.59124600 | 2.71461300  | 0.14885300  |
| C | -1.27250700 | -6.31621700 | 2.18102500  |
| H | -0.38585700 | -6.66617900 | 1.62731700  |
| C | 1.65851600  | -2.77647600 | -5.69109900 |
| H | 2.19398400  | -3.60313800 | -5.19628600 |
| N | 5.75526400  | -0.14814700 | 1.36387700  |
| C | 2.59182600  | -1.56817100 | -5.74375900 |
| H | 2.07541100  | -0.73831000 | -6.25396800 |
| N | 2.73649100  | 4.61493500  | -1.78020000 |
| C | 4.54626400  | 0.28586900  | -0.67393500 |
| C | 2.98471100  | 0.03082400  | -4.10650000 |
| H | 2.55138100  | 0.77646300  | -4.79155300 |
| C | 5.72413200  | -1.13746000 | 3.57209700  |
| H | 5.72026100  | -0.12113400 | 3.99842100  |
| C | 4.12074800  | -0.24272200 | -1.88709500 |
| H | 4.28958900  | -1.28964300 | -2.12719200 |
| C | 3.64086500  | 2.44163200  | -1.29870600 |
| C | 6.44016700  | -1.10079700 | 2.21890300  |
| H | 6.40816100  | -2.11736600 | 1.79276600  |
| C | 3.22139100  | 1.90021500  | -2.51905100 |
| H | 2.68666800  | 2.53959300  | -3.21625900 |



|   |             |             |             |
|---|-------------|-------------|-------------|
| C | 4.30500900  | 1.63471500  | -0.38318800 |
| H | 4.63734600  | 2.02806500  | 0.57418200  |
| C | 3.45833800  | 0.56514700  | -2.81823000 |
| C | 2.52178300  | 5.99364300  | -1.38163900 |
| H | 2.80261800  | 6.15437000  | -0.32748100 |
| C | 3.35018700  | 3.85027000  | -0.97432800 |
| H | 3.69551100  | 4.19936000  | 0.01177400  |
| C | 5.24884300  | -0.58472400 | 0.28604600  |
| H | 5.31733500  | -1.64622200 | 0.00054300  |
| C | 1.25290600  | -3.19844600 | -7.10283000 |
| H | 0.69599600  | -2.39270700 | -7.59062200 |
| H | 2.13595000  | -3.43213100 | -7.70541300 |
| H | 0.61112600  | -4.08272600 | -7.06737200 |
| C | 3.35661500  | 6.90100800  | -2.28345000 |
| H | 3.09000100  | 6.73689100  | -3.33185900 |
| H | 3.18927900  | 7.95385400  | -2.03600200 |
| H | 4.42058500  | 6.68010200  | -2.16512400 |
| C | -3.46491900 | 3.56527800  | 6.48918500  |
| H | -4.43075200 | 3.06992600  | 6.35195100  |
| H | -3.23665700 | 3.60715600  | 7.55856100  |
| H | -3.55078100 | 4.58728600  | 6.11123400  |
| C | -1.56239000 | -7.25842300 | 3.34734800  |
| H | -2.44363400 | -6.91583100 | 3.89788800  |
| H | -1.74388600 | -8.27497700 | 2.98541300  |
| H | -0.71670600 | -7.28096200 | 4.03956100  |

|   |             |             |             |
|---|-------------|-------------|-------------|
| C | -7.41518500 | 2.57734800  | -2.44665400 |
| H | -6.99829900 | 3.14741000  | -3.28234200 |
| H | -8.34713400 | 2.10408100  | -2.77059400 |
| H | -7.64263900 | 3.27708100  | -1.63828800 |
| H | -7.03396200 | 0.10803500  | -3.45610900 |
| H | 3.46789200  | -1.84545400 | -6.34439800 |
| H | -2.06300600 | 1.41609500  | 7.33710900  |
| H | 0.88781300  | 7.37588800  | -1.28195000 |
| H | -2.65961300 | -7.31117700 | 0.88367300  |
| H | 6.29001800  | -1.79490200 | 4.24344600  |
| C | 7.89057800  | -0.65657700 | 2.39193000  |
| H | 8.43039700  | -1.34291500 | 3.05158500  |
| H | 8.39861500  | -0.63138900 | 1.42446000  |
| H | 7.92686100  | 0.34942900  | 2.82066800  |
| C | 0.19034600  | 0.19661200  | -2.75444300 |
| C | -0.13101400 | 1.22187600  | -2.15412900 |
| C | 0.66544100  | 1.56639900  | -0.15716500 |
| C | 0.80890600  | 0.59070900  | 0.57930300  |
| C | 0.97187600  | -1.45549100 | -0.36155900 |
| C | 1.19327100  | -1.46368200 | -1.56950100 |
| H | 0.24935400  | -0.48176100 | -3.58463400 |
| H | -0.66381900 | 2.14444800  | -2.05221700 |
| H | 0.72006700  | 2.61204400  | -0.38842400 |
| H | 1.01731600  | 0.10215200  | 1.50814000  |
| H | 0.88092700  | -1.87101000 | 0.61932800  |

H 1.58208600 -1.80426000 -2.50840400

**Product**

0 1

N -1.75040000 5.33791900 -0.46405800

N 4.85875700 1.38407900 -2.76703800

N 1.45241400 3.12951800 4.64497000

N 3.79597600 -4.44167000 -0.24186400

N 2.29152600 -4.92233300 2.19744400

N 4.45511700 3.66634800 -1.01367700

N 0.20024500 -2.34363100 -5.12216700

C 0.47749500 4.03405700 2.10069600

H -0.21705200 4.02163900 2.93668000

C 3.57822500 -5.52156900 1.91467200

H 4.42024900 -4.91234300 2.28182000

N -3.77910800 -3.01818100 3.17309800

C 3.24390600 4.01730800 -1.14458600

H 2.83501300 4.34838000 -2.11254100

N 1.08908300 0.38136800 5.59767200

C 2.29431400 4.02157400 -0.01610000

C 2.18526000 3.01681400 3.61657600

H 3.18439400 2.55564500 3.65934300

C 1.76751100 3.52173100 2.29464200

C -1.28834500 4.99875100 0.66824600

H -1.90862900 5.02795700 1.57839000

C -2.68773600 -3.50045200 2.74510300

|   |             |             |             |
|---|-------------|-------------|-------------|
| H | -2.65695000 | -4.38783000 | 2.09394900  |
| C | 2.66540500  | 3.51007700  | 1.23533700  |
| H | 3.66975000  | 3.11259100  | 1.35651900  |
| C | 1.01514800  | 4.53090100  | -0.19575500 |
| H | 0.69991900  | 4.92250200  | -1.16008000 |
| C | 0.09540600  | 4.52864000  | 0.86138100  |
| C | 1.91201900  | -2.73374900 | -2.84662800 |
| H | 1.19309400  | -3.51501400 | -3.07918500 |
| C | 4.75112700  | 0.35005000  | -2.04169200 |
| H | 5.41745900  | 0.16678900  | -1.18448900 |
| C | 1.87852100  | -1.54990600 | -3.59602400 |
| C | -0.20901700 | -3.59188300 | 2.74644800  |
| H | -0.24429800 | -4.51474900 | 2.17307500  |
| C | 0.91960300  | -1.38624600 | -4.70710300 |
| H | 0.89490100  | -0.38977500 | -5.17519100 |
| C | -1.37595800 | -2.93130300 | 3.11361500  |
| C | 3.77637500  | -1.88195300 | -1.57371200 |
| H | 4.51158600  | -2.03603500 | -0.78794000 |
| C | 2.28910300  | -3.78991500 | 2.76727200  |
| H | 3.22208700  | -3.27786800 | 3.05000000  |
| C | -1.29387800 | -1.74816800 | 3.86210000  |
| H | -2.21765500 | -1.25387800 | 4.15297000  |
| C | 5.29267800  | 3.70057500  | -2.19247100 |
| H | 4.74413400  | 4.01561500  | -3.09543900 |
| C | 0.00605100  | -0.02068600 | 5.07634100  |

|   |             |             |             |
|---|-------------|-------------|-------------|
| H | -0.95227300 | 0.49388500  | 5.24767800  |
| C | 2.79415500  | -0.54124400 | -3.32231700 |
| H | 2.79906000  | 0.38166800  | -3.89720400 |
| C | 1.96781300  | 2.62049200  | 5.89672000  |
| H | 2.98087000  | 2.19647600  | 5.80083600  |
| C | 3.74794100  | -5.73997400 | 0.40821200  |
| H | 2.88765000  | -6.33176600 | 0.05435400  |
| C | -0.67014000 | -2.09120000 | -6.25033300 |
| H | -0.59308300 | -1.05739600 | -6.62481400 |
| C | 1.04293300  | -3.08222700 | 3.12090000  |
| N | -4.05891200 | 3.68416100  | -1.26131000 |
| C | 2.89436400  | -4.17800200 | -1.09309000 |
| H | 2.09578700  | -4.89568600 | -1.33704900 |
| C | 2.85652500  | -2.90622000 | -1.84181800 |
| C | 5.91713300  | 2.32622100  | -2.44506600 |
| H | 6.45259700  | 2.02555600  | -1.52942500 |
| C | -0.05855800 | -1.23497400 | 4.23796200  |
| C | 1.11164300  | -1.90697000 | 3.85944800  |
| H | 2.06890400  | -1.49519600 | 4.16825800  |
| C | 3.74980000  | -0.70216700 | -2.30865500 |
| C | 1.03545400  | 1.54672300  | 6.46318000  |
| H | 0.01794100  | 1.96933500  | 6.50277800  |
| C | -3.11887100 | 5.82919500  | -0.50383700 |
| H | -3.62943000 | 5.65610000  | 0.45792700  |
| N | -5.32047900 | -2.28931100 | 0.81822900  |

|   |             |             |             |
|---|-------------|-------------|-------------|
| C | -3.89559600 | 5.08564100  | -1.59004700 |
| H | -3.38990100 | 5.23534700  | -2.55815000 |
| N | -2.56083300 | -1.38129900 | -4.91647700 |
| C | -4.53563100 | -0.51410400 | -0.60522900 |
| C | -3.74354300 | 2.83822800  | -2.15296400 |
| H | -3.33322000 | 3.14906500  | -3.12703400 |
| C | -5.00388600 | -3.67871500 | 2.77482900  |
| H | -4.82412200 | -4.54197800 | 2.11339900  |
| C | -4.46882000 | 0.85903700  | -0.80018900 |
| H | -4.84994900 | 1.54903000  | -0.05099800 |
| C | -3.46021000 | -0.86748800 | -2.74653600 |
| C | -5.94201400 | -2.69965200 | 2.06464100  |
| H | -6.10350600 | -1.83803400 | 2.73358800  |
| C | -3.39354900 | 0.52023200  | -2.93065600 |
| H | -2.93713700 | 0.90198100  | -3.84025800 |
| C | -4.02205500 | -1.37709900 | -1.58337400 |
| H | -4.08023500 | -2.44890500 | -1.41228100 |
| C | -3.88575900 | 1.38353000  | -1.96161800 |
| C | -2.12875600 | -2.37491000 | -5.88264800 |
| H | -2.17938200 | -3.39285400 | -5.46183300 |
| C | -2.96126700 | -1.78954300 | -3.78494900 |
| H | -2.97901700 | -2.85909400 | -3.52346300 |
| C | -5.14013300 | -1.04856200 | 0.62972000  |
| H | -5.43467900 | -0.29708600 | 1.37947900  |
| C | -3.08579800 | 7.32696500  | -0.80609000 |

|   |             |             |             |
|---|-------------|-------------|-------------|
| H | -2.57089900 | 7.50802100  | -1.75448700 |
| H | -4.10051000 | 7.73144700  | -0.87190600 |
| H | -2.54739200 | 7.86236200  | -0.01970300 |
| C | -3.02222500 | -2.27855400 | -7.11725200 |
| H | -2.96826200 | -1.27197900 | -7.54278100 |
| H | -2.71149800 | -3.00193000 | -7.87728200 |
| H | -4.06319400 | -2.47878800 | -6.85067700 |
| C | 5.04720800  | -6.48610400 | 0.11545200  |
| H | 5.90316400  | -5.90402900 | 0.46980900  |
| H | 5.05262700  | -7.46177900 | 0.61086100  |
| H | 5.16384700  | -6.64126400 | -0.96022400 |
| C | 1.48036300  | 1.13211900  | 7.86406700  |
| H | 2.49304800  | 0.71920100  | 7.83040000  |
| H | 1.47033000  | 1.99101200  | 8.54199900  |
| H | 0.81369800  | 0.36411300  | 8.26476200  |
| C | 6.89166600  | 2.38600600  | -3.61930500 |
| H | 6.36405800  | 2.68114300  | -4.53124200 |
| H | 7.68965700  | 3.10844600  | -3.42238700 |
| H | 7.34392500  | 1.40569900  | -3.79055400 |
| H | 6.10539800  | 4.41573200  | -2.01360400 |
| H | -4.89628400 | 5.53248300  | -1.65339900 |
| H | 3.61510400  | -6.49998800 | 2.40904100  |
| H | -0.38050800 | -2.77575300 | -7.05727400 |
| H | 2.00550700  | 3.45210700  | 6.61128300  |
| H | -5.50564800 | -4.03590700 | 3.68281600  |

|   |             |             |             |
|---|-------------|-------------|-------------|
| C | -7.27810400 | -3.36977300 | 1.75164800  |
| H | -7.75984200 | -3.72032500 | 2.66958100  |
| H | -7.94960300 | -2.66618500 | 1.25275200  |
| H | -7.12337600 | -4.22317100 | 1.08464400  |
| C | -0.70644500 | 1.90799000  | -0.86134500 |
| C | 0.34662200  | 1.06115800  | -1.19541000 |
| C | 0.57983800  | -0.08957200 | -0.44408600 |
| C | -0.23936600 | -0.39027300 | 0.64170900  |
| C | -1.29032500 | 0.46121400  | 0.97862800  |
| C | -1.52007200 | 1.61199400  | 0.23003800  |
| H | -0.89599700 | 2.81352500  | -1.43497000 |
| H | 0.99490200  | 1.29748600  | -2.03577600 |
| H | 1.40107100  | -0.75046600 | -0.70677900 |
| H | -0.06066100 | -1.28802800 | 1.22651600  |
| H | -1.93288300 | 0.21778300  | 1.82144300  |
| H | -2.34162500 | 2.28178800  | 0.47753300  |

## 2. Cheletropic reaction

Without CC2 cage

Reactant

0 1

|   |             |             |             |
|---|-------------|-------------|-------------|
| C | -1.02839200 | -1.34356700 | -1.00209300 |
| C | -1.53071500 | -1.07743900 | 0.20832500  |
| C | -2.21347500 | 0.17475900  | 0.57456400  |
| C | -1.95425800 | 1.36563300  | 0.02868600  |
| S | 1.34873300  | 0.33853400  | 0.33483500  |



|   |             |             |             |
|---|-------------|-------------|-------------|
| H | -1.13510900 | -0.64422400 | -1.82715000 |
| H | -1.44190600 | -1.82853100 | 0.99201400  |
| H | -2.96066400 | 0.10331100  | 1.36277600  |
| H | -1.18473200 | 1.49294800  | -0.72926500 |
| O | 2.16038900  | -0.83029100 | 0.59584800  |
| O | 1.40336300  | 0.92557900  | -0.98771400 |
| H | -0.50427400 | -2.27197300 | -1.20463800 |
| H | -2.50202100 | 2.25330900  | 0.32693900  |

**TS**

0 1

|   |             |             |             |
|---|-------------|-------------|-------------|
| C | 0.89016100  | 1.39887100  | -0.55493400 |
| C | 1.82358300  | 0.69969100  | 0.20420800  |
| C | 1.82362100  | -0.69961600 | 0.20432000  |
| C | 0.89024300  | -1.39896700 | -0.55470800 |
| S | -0.90171100 | -0.00000500 | 0.05724400  |
| H | 0.63545000  | 1.08337100  | -1.56424100 |
| H | 2.35241800  | 1.21846200  | 0.99782900  |
| H | 2.35247700  | -1.21822800 | 0.99803200  |
| H | 0.63549100  | -1.08362100 | -1.56405300 |
| O | -1.15168000 | 0.00016000  | 1.48748000  |
| O | -2.04271600 | -0.00012300 | -0.84445400 |
| H | 0.72047100  | 2.45426900  | -0.36069400 |
| H | 0.72059100  | -2.45433900 | -0.36029700 |

**Product**

0 1

|   |             |             |             |
|---|-------------|-------------|-------------|
| C | -0.48846700 | -1.34701900 | -0.17562000 |
| C | -1.81478200 | -0.66674300 | 0.00011000  |
| C | -1.81478300 | 0.66674300  | 0.00011600  |
| C | -0.48846900 | 1.34702000  | -0.17560700 |
| S | 0.71844100  | 0.00000000  | 0.02455500  |
| H | -0.34869500 | -1.78033100 | -1.17013700 |
| H | -2.71570300 | -1.25817800 | 0.12401800  |
| H | -2.71570400 | 1.25817600  | 0.12403000  |
| H | -0.34869600 | 1.78034000  | -1.17012200 |
| O | 1.18040900  | -0.00001000 | 1.40809400  |
| O | 1.67108300  | 0.00000900  | -1.07949600 |
| H | -0.26959300 | -2.09771300 | 0.58826700  |
| H | -0.26959400 | 2.09770800  | 0.58828500  |

**With cage**

**Reactant**

0 1

|   |             |             |             |
|---|-------------|-------------|-------------|
| N | -4.10556600 | 4.21829600  | -0.74437200 |
| N | 3.03337000  | 2.23344900  | -4.14971000 |
| N | 0.69999900  | 4.43215100  | 3.53321700  |
| N | 4.94626500  | -2.82120000 | -0.67613800 |
| N | 4.28812100  | -3.13800700 | 2.12441000  |
| N | 2.00420300  | 4.54164200  | -2.72608400 |
| N | -0.07034700 | -3.34024200 | -4.64940500 |
| C | -1.07253200 | 4.23085500  | 1.26949600  |
| H | -1.51839800 | 4.20556400  | 2.26060700  |

|   |             |             |             |
|---|-------------|-------------|-------------|
| C | 5.62208200  | -3.31879600 | 1.59248200  |
| H | 6.21355100  | -2.38936900 | 1.60363400  |
| N | -1.69133900 | -3.29793800 | 4.43672000  |
| C | 0.75779500  | 4.36157300  | -2.58292200 |
| H | 0.07805800  | 4.26189500  | -3.44444600 |
| N | 1.75770000  | 2.06914600  | 4.93266400  |
| C | 0.12535800  | 4.29874900  | -1.25048700 |
| C | 1.17886500  | 4.29064100  | 2.36832500  |
| H | 2.25957900  | 4.19940800  | 2.18512100  |
| C | 0.32398200  | 4.26590900  | 1.16487800  |
| C | -3.33229900 | 4.15676000  | 0.25783000  |
| H | -3.71517600 | 4.04884700  | 1.28455600  |
| C | -0.61988500 | -3.44675700 | 3.77559500  |
| H | -0.38024200 | -4.38790200 | 3.25552600  |
| C | 0.91418100  | 4.29245300  | -0.09193000 |
| H | 1.99562600  | 4.31424200  | -0.19932600 |
| C | -1.25974500 | 4.26050900  | -1.13773800 |
| H | -1.89618900 | 4.25272600  | -2.01908300 |
| C | -1.86453200 | 4.22394300  | 0.12672900  |
| C | 2.05909200  | -2.56044700 | -2.87405700 |
| H | 1.69143200  | -3.58118900 | -2.80312700 |
| C | 3.48420000  | 1.44416400  | -3.26572600 |
| H | 4.29401100  | 1.73313300  | -2.57748700 |
| C | 1.41428000  | -1.67576700 | -3.75029600 |
| C | 1.63756100  | -2.65874100 | 3.11543100  |

|   |             |             |             |
|---|-------------|-------------|-------------|
| H | 1.86280000  | -3.64156100 | 2.70882800  |
| C | 0.28296500  | -2.12459500 | -4.58449400 |
| H | -0.22034600 | -1.33834100 | -5.16923900 |
| C | 0.40049400  | -2.38351800 | 3.68422900  |
| C | 3.61932200  | -0.82268200 | -2.26307100 |
| H | 4.48466900  | -0.51631900 | -1.68169200 |
| C | 3.97117800  | -1.97447200 | 2.51609500  |
| H | 4.67053200  | -1.12772800 | 2.46685700  |
| C | 0.14482300  | -1.10401900 | 4.19800100  |
| H | -0.82894100 | -0.90768700 | 4.63951600  |
| C | 2.53046500  | 4.59964400  | -4.07148600 |
| H | 1.75574300  | 4.44302600  | -4.83997500 |
| C | 0.85176500  | 1.19918000  | 4.76588600  |
| H | -0.18571200 | 1.36566500  | 5.09542900  |
| C | 1.86791700  | -0.36758400 | -3.85940700 |
| H | 1.38511200  | 0.33769200  | -4.53132100 |
| C | 1.63786600  | 4.47238500  | 4.63482300  |
| H | 2.68781300  | 4.43704100  | 4.30207800  |
| C | 5.55253200  | -3.84530000 | 0.15594000  |
| H | 4.94412300  | -4.76495700 | 0.16368200  |
| C | -1.18685000 | -3.66391300 | -5.51047900 |
| H | -1.55987900 | -2.78964200 | -6.06845400 |
| C | 2.63783400  | -1.67547600 | 3.07972900  |
| N | -5.53357100 | 1.67571800  | -0.66721100 |
| C | 3.84973400  | -3.09886700 | -1.24699100 |

|   |             |             |             |
|---|-------------|-------------|-------------|
| H | 3.36131500  | -4.07893400 | -1.12944200 |
| C | 3.15837200  | -2.14154600 | -2.13384500 |
| C | 3.63188600  | 3.55264200  | -4.25389100 |
| H | 4.38514800  | 3.71337800  | -3.46529300 |
| C | 1.12537700  | -0.12138000 | 4.16459900  |
| C | 2.37847400  | -0.41483900 | 3.60715300  |
| H | 3.13545200  | 0.36637900  | 3.58970100  |
| C | 2.97474400  | 0.06578100  | -3.11683000 |
| C | 1.39066600  | 3.30777500  | 5.59742500  |
| H | 0.32185800  | 3.31514500  | 5.86834200  |
| C | -5.53378000 | 4.12700500  | -0.50296400 |
| H | -5.75203500 | 3.99799500  | 0.57008500  |
| N | -3.81689300 | -3.65838300 | 2.52233200  |
| C | -6.05997300 | 2.89498200  | -1.24470700 |
| H | -5.81268100 | 2.99818500  | -2.31389000 |
| N | -2.82762700 | -3.21794300 | -3.78928200 |
| C | -3.99376800 | -2.05536200 | 0.74106000  |
| C | -4.82483800 | 0.93668000  | -1.41526200 |
| H | -4.60378300 | 1.20624600  | -2.45980000 |
| C | -2.61583900 | -4.40970000 | 4.47799100  |
| H | -2.25695900 | -5.28218400 | 3.90786300  |
| C | -4.41266000 | -0.78535800 | 0.36173300  |
| H | -4.84781300 | -0.09941500 | 1.08449100  |
| C | -3.33543200 | -2.51872000 | -1.54268100 |
| C | -3.98034100 | -3.98569200 | 3.92680500  |

|   |             |             |             |
|---|-------------|-------------|-------------|
| H | -4.32243500 | -3.11120800 | 4.50472000  |
| C | -3.75195000 | -1.23333600 | -1.91347200 |
| H | -3.65928700 | -0.93593300 | -2.95500700 |
| C | -3.45934400 | -2.92286200 | -0.21969000 |
| H | -3.14582800 | -3.91537800 | 0.09418900  |
| C | -4.29998500 | -0.37036200 | -0.97253800 |
| C | -2.33732500 | -4.24890800 | -4.68716100 |
| H | -1.94762000 | -5.11466800 | -4.12659700 |
| C | -2.81252000 | -3.46567100 | -2.54582700 |
| H | -2.43372300 | -4.42007000 | -2.14718800 |
| C | -4.11581000 | -2.48443400 | 2.14727900  |
| H | -4.48966500 | -1.72448400 | 2.85130700  |
| C | -6.20696900 | 5.39501900  | -1.02199900 |
| H | -5.99614000 | 5.52305400  | -2.08793800 |
| H | -7.29057000 | 5.34388400  | -0.87871600 |
| H | -5.82682300 | 6.27260800  | -0.49277800 |
| C | -3.47970200 | -4.69278200 | -5.59782600 |
| H | -3.87235800 | -3.83595700 | -6.15337600 |
| H | -3.13467300 | -5.44894400 | -6.30963700 |
| H | -4.29531100 | -5.11728800 | -5.00677200 |
| C | 6.95030000  | -4.15016000 | -0.37604800 |
| H | 7.55753900  | -3.24019100 | -0.37954000 |
| H | 7.44401500  | -4.90353800 | 0.24537500  |
| H | 6.89533800  | -4.52615100 | -1.40094000 |
| C | 2.24618300  | 3.45744800  | 6.85326400  |

|   |             |             |             |
|---|-------------|-------------|-------------|
| H | 3.30719300  | 3.46686200  | 6.58628000  |
| H | 2.00385500  | 4.38748200  | 7.37633400  |
| H | 2.07487900  | 2.61972600  | 7.53425900  |
| C | 4.28191000  | 3.68761500  | -5.62896800 |
| H | 3.53741800  | 3.52715300  | -6.41451400 |
| H | 4.71902600  | 4.68304700  | -5.75315800 |
| H | 5.07221300  | 2.94267300  | -5.75242600 |
| H | 2.97321400  | 5.59219500  | -4.22135500 |
| H | -7.15175100 | 2.87153100  | -1.14147000 |
| H | 6.13652600  | -4.06840600 | 2.20649600  |
| H | -0.85613400 | -4.42252400 | -6.23008100 |
| H | 1.47715400  | 5.40911600  | 5.18247400  |
| H | -2.74521000 | -4.70726100 | 5.52581300  |
| C | -4.99117500 | -5.12224000 | 4.05704200  |
| H | -5.10943200 | -5.41644300 | 5.10435800  |
| H | -5.96543400 | -4.81228700 | 3.67035600  |
| H | -4.65688600 | -5.99013800 | 3.48082100  |
| C | -0.49360300 | -1.52320200 | 0.25221600  |
| C | -0.96247600 | -0.28370500 | 0.42580200  |
| C | -0.77324100 | 0.81630600  | -0.53337800 |
| C | -0.69643300 | 0.65595800  | -1.85763500 |
| S | 2.23322700  | 0.50714900  | 0.51530900  |
| H | 0.08940300  | -1.79105400 | -0.62818200 |
| H | -1.49596500 | -0.04267100 | 1.34437900  |
| H | -0.68495600 | 1.81437600  | -0.10930300 |

|   |             |             |             |
|---|-------------|-------------|-------------|
| H | -0.83014100 | -0.32084600 | -2.31903900 |
| O | 1.58891200  | 1.53164700  | 1.31302400  |
| O | 3.68291400  | 0.45295200  | 0.58613400  |
| H | -0.68490500 | -2.30477000 | 0.98190500  |
| H | -0.51282000 | 1.50047600  | -2.51718400 |

**TS**

0 1

|   |             |             |             |
|---|-------------|-------------|-------------|
| N | -3.95550900 | 4.25597800  | 1.40865700  |
| N | 4.15423900  | 3.94477000  | -0.05410800 |
| N | -0.99432300 | 0.31562800  | 5.52908400  |
| N | 5.06291700  | -2.37188300 | -1.06354000 |
| N | 3.48356600  | -4.53044900 | 0.20923700  |
| N | 2.43905600  | 4.57710000  | 2.19886800  |
| N | 1.85386800  | 1.14018500  | -5.34021100 |
| C | -1.82186000 | 2.18427500  | 3.51044300  |
| H | -2.58241500 | 1.54240000  | 3.94776100  |
| C | 4.92880800  | -4.47948500 | 0.13891100  |
| H | 5.37963400  | -3.96125900 | 1.00029300  |
| N | -2.91462700 | -5.17788600 | -0.21533500 |
| C | 1.21863500  | 4.69037800  | 1.87301700  |
| H | 0.87230500  | 5.46066500  | 1.16545200  |
| N | -0.32793400 | -2.51836700 | 4.99033600  |
| C | 0.17025800  | 3.81165100  | 2.43022700  |
| C | -0.11838300 | 0.93925700  | 4.85853600  |
| H | 0.95874200  | 0.77226400  | 4.99603100  |



|   |             |             |             |
|---|-------------|-------------|-------------|
| C | -0.48473600 | 1.97138500  | 3.86656900  |
| C | -3.57552500 | 3.36481100  | 2.22643600  |
| H | -4.28255900 | 2.65441200  | 2.68258000  |
| C | -1.65964600 | -5.11499200 | -0.38322400 |
| H | -1.17480400 | -5.46475200 | -1.30822400 |
| C | 0.50472200  | 2.77162100  | 3.30991700  |
| H | 1.55105400  | 2.61468500  | 3.55921000  |
| C | -1.16182800 | 4.02245300  | 2.09077700  |
| H | -1.44877700 | 4.81614600  | 1.40517700  |
| C | -2.16414000 | 3.19630200  | 2.62050200  |
| C | 3.18326700  | 0.00707400  | -3.06542600 |
| H | 2.83835500  | -0.66654700 | -3.84599300 |
| C | 4.44241200  | 2.70981000  | -0.01755000 |
| H | 4.99009200  | 2.26023800  | 0.82494500  |
| C | 2.90512000  | 1.37674200  | -3.19417500 |
| C | 0.61529500  | -4.55629200 | 0.44744100  |
| H | 1.05491500  | -4.99505800 | -0.44502600 |
| C | 2.15619900  | 1.88399000  | -4.35968300 |
| H | 1.88316700  | 2.95025400  | -4.32757900 |
| C | -0.76137600 | -4.55322300 | 0.64426000  |
| C | 4.33476700  | 0.42780800  | -0.98632400 |
| H | 4.87283900  | 0.03211000  | -0.12978400 |
| C | 2.93379800  | -3.97280300 | 1.20637000  |
| H | 3.51205100  | -3.45959500 | 1.98675500  |
| C | -1.29373700 | -3.97012400 | 1.80412100  |

|   |             |             |             |
|---|-------------|-------------|-------------|
| H | -2.37262700 | -3.97287700 | 1.93664200  |
| C | 3.38208100  | 5.51210000  | 1.62317900  |
| H | 2.93246700  | 6.13629800  | 0.83362400  |
| C | -1.03876700 | -2.84849300 | 3.99544400  |
| H | -2.13753600 | -2.77218300 | 4.01145100  |
| C | 3.33878800  | 2.25656000  | -2.21191600 |
| H | 3.12371300  | 3.32016900  | -2.27686500 |
| C | -0.52065700 | -0.63754500 | 6.51056000  |
| H | 0.57824800  | -0.65768700 | 6.58835100  |
| C | 5.38504500  | -3.78654700 | -1.14756500 |
| H | 4.85936000  | -4.26661800 | -1.98972700 |
| C | 1.10146700  | 1.73032500  | -6.42492000 |
| H | 0.86190300  | 2.79188100  | -6.24967900 |
| C | 1.46850500  | -3.97951900 | 1.39989900  |
| N | -5.09053600 | 2.72328800  | -0.77903100 |
| C | 4.24476500  | -1.90533800 | -1.91036700 |
| H | 3.77439500  | -2.53971200 | -2.67841600 |
| C | 3.90341400  | -0.46947600 | -1.97662600 |
| C | 4.59558600  | 4.77661600  | 1.05164100  |
| H | 5.03353400  | 4.16662600  | 1.85860000  |
| C | -0.45691000 | -3.40866300 | 2.75937700  |
| C | 0.93011000  | -3.41534500 | 2.55155500  |
| H | 1.56956700  | -2.95468500 | 3.30009400  |
| C | 4.04726200  | 1.78299400  | -1.09673700 |
| C | -1.01203400 | -2.04920600 | 6.18277800  |

|   |             |             |             |
|---|-------------|-------------|-------------|
| H | -2.10269700 | -2.00070200 | 6.02683900  |
| C | -5.36904000 | 4.30493900  | 1.07979600  |
| H | -5.92949200 | 3.51553100  | 1.60741700  |
| N | -4.08666000 | -3.47930500 | -2.21952500 |
| C | -5.51566600 | 4.06226400  | -0.42536400 |
| H | -4.95058500 | 4.84040200  | -0.96391300 |
| N | -1.03484200 | 1.10543700  | -5.46306200 |
| C | -3.71860300 | -1.10348700 | -2.13030200 |
| C | -4.12834700 | 2.61959800  | -1.59840600 |
| H | -3.62893900 | 3.50474500  | -2.02267700 |
| C | -3.71726200 | -5.69295900 | -1.30149500 |
| H | -3.11651000 | -5.96182500 | -2.18581400 |
| C | -4.14668800 | 0.10898800  | -1.60073500 |
| H | -4.89882000 | 0.14374800  | -0.81603100 |
| C | -2.26499200 | 0.08249100  | -3.66533300 |
| C | -4.76865100 | -4.65547200 | -1.70682600 |
| H | -5.36320400 | -4.41139500 | -0.81103900 |
| C | -2.69443300 | 1.29822800  | -3.11665500 |
| H | -2.30003500 | 2.22254900  | -3.53091700 |
| C | -2.76789700 | -1.11036300 | -3.16104900 |
| H | -2.46189500 | -2.06716700 | -3.57645400 |
| C | -3.63382500 | 1.31867600  | -2.09233900 |
| C | -0.19934400 | 0.95290500  | -6.64199800 |
| H | 0.06613800  | -0.10429600 | -6.80765400 |
| C | -1.35543300 | 0.05558700  | -4.82876300 |

|   |             |             |             |
|---|-------------|-------------|-------------|
| H | -1.00919100 | -0.94229900 | -5.14018800 |
| C | -4.31326100 | -2.36861600 | -1.65142700 |
| H | -4.99225900 | -2.28229600 | -0.78860800 |
| C | -5.92208500 | 5.67630300  | 1.45871700  |
| H | -5.37012700 | 6.46227500  | 0.93460100  |
| H | -6.98165600 | 5.75227200  | 1.19614400  |
| H | -5.81690700 | 5.84597700  | 2.53335400  |
| C | -0.95636500 | 1.49375300  | -7.85238700 |
| H | -1.21991000 | 2.54353900  | -7.69291400 |
| H | -0.34512800 | 1.41521100  | -8.75663700 |
| H | -1.88064200 | 0.93119800  | -8.00710800 |
| C | 6.89469000  | -3.92744600 | -1.32873200 |
| H | 7.41849700  | -3.47032800 | -0.48391100 |
| H | 7.17863300  | -4.98221900 | -1.39342900 |
| H | 7.21875300  | -3.42264000 | -2.24254200 |
| C | -0.69467700 | -3.00724600 | 7.32936600  |
| H | 0.38563100  | -3.04579000 | 7.49844700  |
| H | -1.18664300 | -2.68237300 | 8.25123900  |
| H | -1.03681000 | -4.01720700 | 7.08876400  |
| C | 5.63154700  | 5.77239500  | 0.53405500  |
| H | 5.20496000  | 6.37329600  | -0.27473300 |
| H | 5.95975700  | 6.44061100  | 1.33608900  |
| H | 6.50473500  | 5.24484500  | 0.14162200  |
| H | 3.73335200  | 6.17241600  | 2.42651500  |
| H | -6.57635500 | 4.15991400  | -0.68717000 |

|   |             |             |             |
|---|-------------|-------------|-------------|
| H | 5.30255100  | -5.51094200 | 0.11837700  |
| H | 1.70145000  | 1.65516000  | -7.34023000 |
| H | -0.93370900 | -0.35044700 | 7.48560000  |
| H | -4.24104100 | -6.59058100 | -0.95023900 |
| C | -5.68013600 | -5.20905800 | -2.79953600 |
| H | -6.18475200 | -6.11775400 | -2.45732500 |
| H | -6.43911900 | -4.47183400 | -3.07389900 |
| H | -5.09523700 | -5.44431300 | -3.69367000 |
| C | -0.12363200 | -1.15881800 | -0.33596200 |
| C | -0.95656300 | -0.07091100 | -0.08895100 |
| C | -0.41975700 | 1.21216600  | 0.05472900  |
| C | 0.95644000  | 1.39818000  | -0.05290000 |
| S | 1.46847100  | -0.47184800 | 1.26229900  |
| H | 0.71245600  | -1.08108300 | -1.03024200 |
| H | -1.96820700 | -0.25290900 | 0.26158600  |
| H | -1.03119400 | 1.98622500  | 0.50827200  |
| H | 1.52433100  | 0.87205000  | -0.81753300 |
| O | 0.91086000  | -0.36352000 | 2.60524500  |
| O | 2.81748200  | -1.02433900 | 1.16342600  |
| H | -0.50353500 | -2.16637500 | -0.19487900 |
| H | 1.41860200  | 2.32142500  | 0.29376500  |

**Product**

0 1

|   |             |             |             |
|---|-------------|-------------|-------------|
| N | -2.51388500 | -3.83289700 | -3.70660000 |
| N | 5.24091800  | -1.45814900 | -1.99023400 |

|   |             |             |             |
|---|-------------|-------------|-------------|
| N | -1.74510000 | 2.46752300  | -4.65667300 |
| N | 4.05405400  | 3.07876300  | 2.42747500  |
| N | 1.63331000  | 4.84803800  | 2.44623200  |
| N | 3.38258900  | -1.31583700 | -4.20807600 |
| N | 3.10421900  | -3.09701200 | 3.82849900  |
| C | -1.57416200 | -0.32978500 | -4.03991600 |
| H | -2.56589800 | 0.11311300  | -4.09546600 |
| C | 3.01503000  | 5.27111200  | 2.53523600  |
| H | 3.47189200  | 5.44979500  | 1.54848000  |
| N | -4.41503500 | 2.69648500  | 2.95158100  |
| C | 2.34634000  | -2.01012900 | -3.98063500 |
| H | 2.39640200  | -3.09946700 | -3.82233500 |
| N | -2.08142600 | 4.62670800  | -2.72519600 |
| C | 0.99310600  | -1.41819100 | -3.95573600 |
| C | -0.61918900 | 1.96595900  | -4.35237000 |
| H | 0.30185000  | 2.56407600  | -4.30059800 |
| C | -0.45843000 | 0.51526500  | -4.11515600 |
| C | -2.59792400 | -2.57064600 | -3.79346300 |
| H | -3.56863400 | -2.05014600 | -3.78057500 |
| C | -3.18762900 | 2.99071400  | 3.07228400  |
| H | -2.65023100 | 2.87194200  | 4.02595200  |
| C | 0.81887700  | -0.02992400 | -4.05588200 |
| H | 1.69695200  | 0.60819000  | -4.09846600 |
| C | -0.11994400 | -2.24703900 | -3.87718400 |
| H | -0.01157600 | -3.32585900 | -3.79425700 |

|   |             |             |             |
|---|-------------|-------------|-------------|
| C | -1.41106300 | -1.70385800 | -3.90996800 |
| C | 3.56404700  | -0.50735200 | 2.67990000  |
| H | 3.16387100  | -0.55653500 | 3.68914400  |
| C | 5.02801900  | -0.40010900 | -1.32353800 |
| H | 5.16131200  | 0.60306700  | -1.75622900 |
| C | 3.80711300  | -1.70967600 | 1.99628900  |
| C | -1.04955900 | 3.83473500  | 2.14750700  |
| H | -0.58683200 | 3.73198900  | 3.12552600  |
| C | 3.49992600  | -3.00709000 | 2.62783700  |
| H | 3.63116700  | -3.89417100 | 1.98814100  |
| C | -2.38582500 | 3.50782100  | 1.94685700  |
| C | 4.32580500  | 0.74210900  | 0.76400200  |
| H | 4.49711600  | 1.70889200  | 0.29719600  |
| C | 1.15222200  | 4.66764900  | 1.28841400  |
| H | 1.74444500  | 4.81116000  | 0.37246600  |
| C | -2.95200800 | 3.65083800  | 0.67038900  |
| H | -3.99769700 | 3.38778900  | 0.53201500  |
| C | 4.65586600  | -2.00072200 | -4.27024100 |
| H | 4.58087900  | -3.06443800 | -3.99057800 |
| C | -2.75269600 | 4.18416800  | -1.74579100 |
| H | -3.78941300 | 3.82834000  | -1.85716300 |
| C | 4.31323800  | -1.67227600 | 0.70388400  |
| H | 4.49950800  | -2.58671100 | 0.14636300  |
| C | -1.78299300 | 3.87658900  | -4.98877300 |
| H | -0.78585900 | 4.34440200  | -4.96527400 |

|   |             |             |             |
|---|-------------|-------------|-------------|
| C | 3.86048000  | 4.23693200  | 3.28284200  |
| H | 3.32455100  | 3.96840000  | 4.20829200  |
| C | 2.79575500  | -4.41428400 | 4.33863000  |
| H | 2.90533700  | -5.20349400 | 3.57673100  |
| C | -0.26196500 | 4.29291800  | 1.08244700  |
| N | -3.67339900 | -4.38041500 | -1.12993600 |
| C | 3.61396400  | 1.96298600  | 2.83306600  |
| H | 3.08086800  | 1.85486800  | 3.79012700  |
| C | 3.83138800  | 0.71322100  | 2.07680000  |
| C | 5.68251400  | -1.31557200 | -3.36538400 |
| H | 5.73717100  | -0.25480100 | -3.66000500 |
| C | -2.17616900 | 4.09797500  | -0.39042200 |
| C | -0.82337700 | 4.40891400  | -0.18152000 |
| H | -0.22474900 | 4.72675700  | -1.03138300 |
| C | 4.56558300  | -0.44185500 | 0.07767800  |
| C | -2.70048000 | 4.64641000  | -4.03560200 |
| H | -3.68548900 | 4.15073900  | -4.02472300 |
| C | -3.74949000 | -4.58206700 | -3.56956200 |
| H | -4.62438200 | -3.91112300 | -3.55713400 |
| N | -4.50030300 | -0.13116800 | 3.61147100  |
| C | -3.70423400 | -5.32239300 | -2.22883100 |
| H | -2.83539100 | -6.00053800 | -2.22888900 |
| N | 0.43546100  | -4.22346000 | 3.79455300  |
| C | -3.38129300 | -1.74042900 | 2.21196000  |
| C | -2.66318500 | -4.41098200 | -0.36432300 |



|   |             |             |             |
|---|-------------|-------------|-------------|
| H | -1.83960000 | -5.12674900 | -0.51551200 |
| C | -5.09217700 | 2.16807500  | 4.11514000  |
| H | -4.44101200 | 2.12301100  | 5.00339800  |
| C | -3.47915900 | -2.52583600 | 1.06941400  |
| H | -4.30395600 | -2.39952800 | 0.37192600  |
| C | -1.38008800 | -2.94459000 | 2.86297200  |
| C | -5.62671100 | 0.76331500  | 3.82178500  |
| H | -6.25981200 | 0.82428800  | 2.92126000  |
| C | -1.48582900 | -3.72706000 | 1.70447600  |
| H | -0.75186200 | -4.51230200 | 1.54026700  |
| C | -2.32118400 | -1.95111900 | 3.10550700  |
| H | -2.27191600 | -1.34145900 | 4.00410100  |
| C | -2.53080300 | -3.52596100 | 0.81022200  |
| C | 1.36746600  | -4.44125100 | 4.88887100  |
| H | 1.28584700  | -3.64252900 | 5.64429600  |
| C | -0.33433800 | -3.21888200 | 3.87042500  |
| H | -0.29490100 | -2.51666800 | 4.71742600  |
| C | -4.43747000 | -0.74998400 | 2.50702000  |
| H | -5.19276000 | -0.61108500 | 1.71751800  |
| C | -3.86823700 | -5.57019200 | -4.72659500 |
| H | -3.00077100 | -6.23670800 | -4.74240000 |
| H | -4.77632000 | -6.17288200 | -4.62878800 |
| H | -3.90518400 | -5.03778500 | -5.68044200 |
| C | 1.06089200  | -5.79327300 | 5.52858600  |
| H | 1.14120600  | -6.58952400 | 4.78255900  |

|   |             |             |             |
|---|-------------|-------------|-------------|
| H | 1.75933800  | -6.00105800 | 6.34495300  |
| H | 0.04405100  | -5.80442200 | 5.92940500  |
| C | 5.23263900  | 4.81360100  | 3.62628700  |
| H | 5.75563100  | 5.10866200  | 2.71148200  |
| H | 5.13240600  | 5.68881900  | 4.27534500  |
| H | 5.84320600  | 4.06628500  | 4.13980700  |
| C | -2.85193700 | 6.09638100  | -4.49036800 |
| H | -1.87607800 | 6.59094000  | -4.49917000 |
| H | -3.28178500 | 6.14242800  | -5.49556100 |
| H | -3.50503000 | 6.64471000  | -3.80645100 |
| C | 7.05391400  | -1.96925800 | -3.51581600 |
| H | 7.00279900  | -3.02265200 | -3.22432700 |
| H | 7.40171800  | -1.90476600 | -4.55138500 |
| H | 7.78500600  | -1.47370100 | -2.87192800 |
| H | 5.01852100  | -1.93974400 | -5.30427200 |
| H | -4.61610000 | -5.92461500 | -2.13612600 |
| H | 3.04042600  | 6.20858900  | 3.10462900  |
| H | 3.48243300  | -4.63269000 | 5.16600800  |
| H | -2.18638200 | 3.96686200  | -6.00500700 |
| H | -5.94603200 | 2.81812600  | 4.34200700  |
| C | -6.44837700 | 0.24299400  | 4.99906600  |
| H | -7.29392100 | 0.90714300  | 5.20233200  |
| H | -6.83474400 | -0.75652300 | 4.78335900  |
| H | -5.82389100 | 0.18042800  | 5.89519700  |
| C | -0.87541400 | 1.06673600  | -0.59198200 |

|   |             |             |             |
|---|-------------|-------------|-------------|
| C | -1.08165700 | -0.41259700 | -0.71998000 |
| C | 0.00152300  | -1.18831400 | -0.69589200 |
| C | 1.33017900  | -0.51421000 | -0.53332300 |
| S | 0.93107000  | 1.25971300  | -0.48897300 |
| H | -1.30059300 | 1.49406500  | 0.32215600  |
| H | -2.08576700 | -0.81115000 | -0.82876000 |
| H | -0.04907300 | -2.26933000 | -0.78177800 |
| H | 1.82003500  | -0.74866800 | 0.41643700  |
| O | 1.42167500  | 1.92669000  | -1.69934600 |
| O | 1.30323400  | 1.79547300  | 0.82144000  |
| H | -1.22097400 | 1.63851000  | -1.46054600 |
| H | 2.02710100  | -0.68838800 | -1.36083600 |

### 3. Dyotropic reaction

Without CC2 cage

Reactant

01

|    |             |             |             |
|----|-------------|-------------|-------------|
| C  | 0.49001600  | -0.57783700 | -0.00000200 |
| H  | 0.37237600  | -1.19534000 | 0.89064200  |
| H  | 0.37235900  | -1.19534700 | -0.89064200 |
| C  | -0.49000100 | 0.57784800  | 0.00000400  |
| H  | -0.37235100 | 1.19536900  | 0.89066000  |
| H  | -0.37237500 | 1.19535900  | -0.89065900 |
| Cl | -2.16113500 | -0.07047600 | 0.00002500  |
| Cl | 2.16112900  | 0.07046900  | -0.00002600 |

TS

0 1

|    |             |             |             |
|----|-------------|-------------|-------------|
| C  | -0.00035400 | 0.70906900  | 0.00020900  |
| H  | -0.00088100 | 1.25553300  | 0.93321200  |
| H  | -0.00078600 | 1.25553100  | -0.93279400 |
| C  | -0.00035700 | -0.70905600 | 0.00020900  |
| H  | -0.00086500 | -1.25552200 | 0.93321100  |
| H  | -0.00079400 | -1.25551700 | -0.93279400 |
| Cl | 2.13749800  | -0.00000300 | -0.00009600 |
| Cl | -2.13705100 | -0.00000300 | -0.00010100 |

**Product**

0 1

|    |             |             |             |
|----|-------------|-------------|-------------|
| C  | 0.48991400  | 0.57801900  | -0.00000200 |
| H  | 0.37245800  | 1.19559000  | 0.89048800  |
| H  | 0.37248900  | 1.19557400  | -0.89050800 |
| C  | -0.48992200 | -0.57802200 | -0.00001000 |
| H  | -0.37248500 | -1.19559100 | 0.89049100  |
| H  | -0.37247200 | -1.19558600 | -0.89051300 |
| Cl | 2.16130900  | -0.07048300 | 0.00003000  |
| Cl | -2.16130600 | 0.07048500  | -0.00002300 |

**With CC2 cage**

**Reactant**

0 1

|   |             |             |            |
|---|-------------|-------------|------------|
| N | -2.71469200 | -2.08624900 | 4.59646800 |
| N | 3.73831200  | 2.64073400  | 3.38720100 |
| N | 1.80064700  | -5.27133800 | 1.34964700 |

|   |             |             |             |
|---|-------------|-------------|-------------|
| N | 4.05989800  | 2.68570300  | -3.01316300 |
| N | 3.24432300  | 0.41988200  | -4.62036200 |
| N | 3.33950000  | 0.03660500  | 4.60817600  |
| N | -0.76797900 | 5.68516300  | -0.01532000 |
| C | 0.13222800  | -3.41354100 | 2.76231500  |
| H | -0.34093900 | -4.27928400 | 2.30583000  |
| C | 4.50066700  | 1.11586000  | -4.79474100 |
| H | 5.31334000  | 0.68616500  | -4.18699100 |
| N | -2.65693500 | -2.07132900 | -4.59739300 |
| C | 2.07816500  | -0.08585600 | 4.59377100  |
| H | 1.41505200  | 0.63268100  | 5.10046500  |
| N | 2.09844400  | -5.07091200 | -1.51785800 |
| C | 1.40676800  | -1.22088400 | 3.92943500  |
| C | 2.29698700  | -4.18470600 | 1.77448800  |
| H | 3.34384800  | -3.90299900 | 1.58349500  |
| C | 1.50934500  | -3.22650500 | 2.57467800  |
| C | -2.04020000 | -2.76335500 | 3.76391200  |
| H | -2.48009000 | -3.59788200 | 3.19637400  |
| C | -1.64326900 | -1.31075300 | -4.57092100 |
| H | -1.64097900 | -0.32295900 | -5.05739000 |
| C | 2.13975400  | -2.13348600 | 3.15664000  |
| H | 3.20560900  | -1.96656600 | 3.02713400  |
| C | 0.04040900  | -1.41088800 | 4.10340900  |
| H | -0.54881200 | -0.72289000 | 4.70435300  |
| C | -0.60369100 | -2.51488100 | 3.52552000  |

|   |             |             |             |
|---|-------------|-------------|-------------|
| C | 1.42914400  | 4.04470500  | -0.89475000 |
| H | 0.78961900  | 4.48157900  | -1.65745500 |
| C | 3.92154000  | 2.39940900  | 2.15616800  |
| H | 4.75246300  | 1.77310400  | 1.79762000  |
| C | 1.07803200  | 4.21541100  | 0.45177800  |
| C | 0.76759800  | -0.94781100 | -4.12675100 |
| H | 0.73670300  | -0.03705100 | -4.71945600 |
| C | -0.10248700 | 5.01677200  | 0.83147600  |
| H | -0.34846100 | 5.02483300  | 1.90481000  |
| C | -0.37528700 | -1.71282400 | -3.93028800 |
| C | 3.39336500  | 2.81040800  | -0.22960900 |
| H | 4.29151900  | 2.27080000  | -0.51687300 |
| C | 3.22064600  | -0.55660900 | -3.81173700 |
| H | 4.11383800  | -0.88228500 | -3.25719600 |
| C | -0.29733500 | -2.88864300 | -3.17065900 |
| H | -1.20035600 | -3.47761500 | -3.03260000 |
| C | 3.89328700  | 1.17652500  | 5.30575700  |
| H | 3.12162400  | 1.78761400  | 5.80190700  |
| C | 0.99294500  | -4.57242700 | -1.88715300 |
| H | 0.03203200  | -5.07592400 | -1.69806200 |
| C | 1.88114400  | 3.66420400  | 1.44415400  |
| H | 1.63236600  | 3.78320600  | 2.49568200  |
| C | 2.65700800  | -6.14210500 | 0.57488100  |
| H | 3.68362900  | -5.75352600 | 0.47714600  |
| C | 4.34272200  | 2.59596500  | -4.43392300 |

|   |             |             |             |
|---|-------------|-------------|-------------|
| H | 3.51227800  | 3.00319400  | -5.03417400 |
| C | -1.88228600 | 6.46653200  | 0.47686900  |
| H | -1.99800800 | 6.39915400  | 1.57095100  |
| C | 1.99547700  | -1.34775800 | -3.57787200 |
| N | -4.90409900 | -0.94312100 | 3.05617300  |
| C | 2.95640800  | 3.19883800  | -2.65891500 |
| H | 2.22420500  | 3.57443200  | -3.39063200 |
| C | 2.58220100  | 3.34844800  | -1.23843000 |
| C | 4.67608800  | 2.06624400  | 4.33564900  |
| H | 5.42469400  | 1.43685800  | 3.82710200  |
| C | 0.91557600  | -3.29784500 | -2.62956000 |
| C | 2.06357700  | -2.51621200 | -2.82842600 |
| H | 3.00300200  | -2.84935500 | -2.39527900 |
| C | 3.04602500  | 2.96044000  | 1.10770300  |
| C | 2.07008200  | -6.34642800 | -0.82508200 |
| H | 1.03766700  | -6.71505400 | -0.70750800 |
| C | -4.10482200 | -2.45645900 | 4.80069600  |
| H | -4.39943800 | -3.28378700 | 4.13425800  |
| N | -4.76112800 | -0.49288600 | -3.35030900 |
| C | -4.98589900 | -1.24952000 | 4.46722800  |
| H | -4.68515000 | -0.40263900 | 5.10571600  |
| N | -3.48232300 | 4.66554700  | 0.25416600  |
| C | -4.47141100 | 0.12762700  | -1.04547900 |
| C | -4.48123900 | 0.20632700  | 2.72908100  |
| H | -4.19790100 | 0.95921800  | 3.48130400  |

|   |             |             |             |
|---|-------------|-------------|-------------|
| C | -3.83370600 | -1.59443800 | -5.29165100 |
| H | -3.68480400 | -0.60249700 | -5.74866500 |
| C | -4.58363000 | -0.27876900 | 0.27816800  |
| H | -4.84425700 | -1.30370900 | 0.52908000  |
| C | -3.90097000 | 2.36329900  | -0.30762100 |
| C | -5.02970100 | -1.52209000 | -4.33817400 |
| H | -5.14571300 | -2.51125700 | -3.86511300 |
| C | -4.01275700 | 1.94196700  | 1.02470500  |
| H | -3.83226000 | 2.66592600  | 1.81516400  |
| C | -4.12568600 | 1.45520000  | -1.33428000 |
| H | -4.04300800 | 1.75499900  | -2.37579900 |
| C | -4.35440400 | 0.62889200  | 1.32140100  |
| C | -3.18814000 | 6.01811600  | -0.18462700 |
| H | -3.04669300 | 6.06271000  | -1.27723300 |
| C | -3.57353800 | 3.76469400  | -0.63322600 |
| H | -3.43236200 | 3.98453200  | -1.70302300 |
| C | -4.72089700 | -0.83965800 | -2.13166200 |
| H | -4.88306200 | -1.88166800 | -1.81509400 |
| C | -4.29011500 | -2.87267400 | 6.25810200  |
| H | -4.00090000 | -2.05334200 | 6.92301200  |
| H | -5.33376200 | -3.13662600 | 6.45437800  |
| H | -3.66259400 | -3.73685000 | 6.49099700  |
| C | -4.34051100 | 6.93118500  | 0.22710300  |
| H | -4.48165100 | 6.89290200  | 1.31140400  |
| H | -4.13884800 | 7.96552100  | -0.06776400 |



|   |             |             |             |
|---|-------------|-------------|-------------|
| H | -5.27061500 | 6.60866300  | -0.24790900 |
| C | 5.62721600  | 3.36467100  | -4.73246700 |
| H | 6.45374400  | 2.95946500  | -4.14117700 |
| H | 5.88225500  | 3.29293300  | -5.79416900 |
| H | 5.50952000  | 4.42002200  | -4.47334300 |
| C | 2.89698200  | -7.35669700 | -1.61595700 |
| H | 3.92295200  | -6.99475200 | -1.73122900 |
| H | 2.91748400  | -8.32362300 | -1.10407700 |
| H | 2.47307300  | -7.49980700 | -2.61322800 |
| C | 5.37228800  | 3.19831400  | 5.08719500  |
| H | 4.63197400  | 3.82400900  | 5.59467500  |
| H | 6.06763800  | 2.79784300  | 5.83118100  |
| H | 5.93167700  | 3.82986100  | 4.39222000  |
| H | 4.58762500  | 0.80450700  | 6.06886300  |
| H | -6.02554000 | -1.50968300 | 4.70133400  |
| H | 4.78292000  | 1.04872000  | -5.85266800 |
| H | -1.70430400 | 7.51548000  | 0.20984700  |
| H | 2.69828500  | -7.11676800 | 1.07620300  |
| H | -4.07114600 | -2.31183600 | -6.08683000 |
| C | -6.30228100 | -1.15704200 | -5.09845900 |
| H | -6.51987400 | -1.90271400 | -5.86922900 |
| H | -7.15321200 | -1.10490500 | -4.41437200 |
| H | -6.18831600 | -0.17841300 | -5.57429000 |
| C | 1.38817800  | -0.00302200 | -0.37528700 |
| H | 1.26275500  | 0.98230900  | 0.07735700  |

|    |             |             |             |
|----|-------------|-------------|-------------|
| H  | 1.31265500  | 0.07219400  | -1.46071100 |
| C  | 0.40504800  | -1.01041500 | 0.18453100  |
| H  | 0.42328000  | -1.01703300 | 1.27473300  |
| H  | 0.60976900  | -2.01334100 | -0.19485100 |
| Cl | 3.05775600  | -0.56144800 | 0.00373300  |
| Cl | -1.25491100 | -0.56125100 | -0.32472200 |

**TS**

0 1

|   |             |             |             |
|---|-------------|-------------|-------------|
| N | -2.24708800 | -2.19244200 | 4.78475900  |
| N | 3.76366100  | 2.93774300  | 3.07346600  |
| N | 2.28058300  | -5.10056500 | 1.31556000  |
| N | 3.63088000  | 2.88778500  | -3.31783200 |
| N | 2.86282600  | 0.51002500  | -4.77138200 |
| N | 3.62142600  | 0.35209300  | 4.39285900  |
| N | -1.17672700 | 5.59066700  | -0.03379300 |
| C | 0.56217200  | -3.32889100 | 2.77123600  |
| H | 0.12784000  | -4.23654800 | 2.35963800  |
| C | 4.05604100  | 1.27824700  | -5.05610500 |
| H | 4.93130400  | 0.93270400  | -4.48340900 |
| N | -2.82650600 | -2.38858700 | -4.36670400 |
| C | 2.36995300  | 0.16032600  | 4.43514500  |
| H | 1.68705500  | 0.85649700  | 4.94718900  |
| N | 2.33038400  | -4.97932800 | -1.56236100 |
| C | 1.74229700  | -1.03181200 | 3.82998100  |
| C | 2.71020500  | -3.95536900 | 1.65172400  |

|   |             |             |             |
|---|-------------|-------------|-------------|
| H | 3.70272000  | -3.58483000 | 1.35556100  |
| C | 1.90581600  | -3.04287200 | 2.48976200  |
| C | -1.57967500 | -2.83208900 | 3.91756200  |
| H | -1.99028800 | -3.71064700 | 3.39603300  |
| C | -1.87227300 | -1.55503800 | -4.40086800 |
| H | -1.96888500 | -0.57657300 | -4.89638600 |
| C | 2.49062200  | -1.89780600 | 3.01902500  |
| H | 3.52654200  | -1.64921900 | 2.80729800  |
| C | 0.40727000  | -1.31871400 | 4.09507400  |
| H | -0.19094700 | -0.66740900 | 4.72728500  |
| C | -0.18779000 | -2.47697600 | 3.57467500  |
| C | 1.05842400  | 4.08894500  | -1.04264500 |
| H | 0.34282300  | 4.47658300  | -1.76325000 |
| C | 3.85358500  | 2.63919900  | 1.84425500  |
| H | 4.66909100  | 2.02094200  | 1.44234600  |
| C | 0.78811800  | 4.25169500  | 0.32336200  |
| C | 0.51869600  | -0.99399800 | -4.07580100 |
| H | 0.38327100  | -0.09574900 | -4.67335100 |
| C | -0.41513700 | 4.97941400  | 0.77426300  |
| H | -0.59050600 | 4.98617900  | 1.86133100  |
| C | -0.54633700 | -1.85104100 | -3.82263600 |
| C | 3.13567900  | 2.98079600  | -0.50340800 |
| H | 4.03580000  | 2.47768500  | -0.84485500 |
| C | 2.95141400  | -0.41350800 | -3.90621100 |
| H | 3.88654400  | -0.63970000 | -3.37351000 |

|   |             |             |             |
|---|-------------|-------------|-------------|
| C | -0.33239500 | -3.01464400 | -3.07082700 |
| H | -1.17327500 | -3.68056400 | -2.89444000 |
| C | 4.14012900  | 1.54843200  | 5.01745100  |
| H | 3.36253300  | 2.12829300  | 5.54126300  |
| C | 1.16385900  | -4.57576500 | -1.84835500 |
| H | 0.26224500  | -5.14855200 | -1.58039000 |
| C | 1.69238400  | 3.76589000  | 1.26303600  |
| H | 1.51030000  | 3.88442700  | 2.32830000  |
| C | 3.14253000  | -5.92734600 | 0.49951300  |
| H | 4.12091400  | -5.46020800 | 0.30369600  |
| C | 3.82129100  | 2.76073600  | -4.74991600 |
| H | 2.92527400  | 3.08467900  | -5.30507600 |
| C | -2.30767500 | 6.30312200  | 0.52080400  |
| H | -2.34870600 | 6.24461500  | 1.62070400  |
| C | 1.80077300  | -1.28542700 | -3.58629600 |
| N | -4.60060500 | -1.24820300 | 3.37355700  |
| C | 2.51417200  | 3.31549600  | -2.89922000 |
| H | 1.70361500  | 3.60822000  | -3.58505300 |
| C | 2.22897000  | 3.46354300  | -1.45796800 |
| C | 4.79930900  | 2.44632800  | 3.96578600  |
| H | 5.54221300  | 1.84050400  | 3.42235700  |
| C | 0.93665200  | -3.31765500 | -2.58955700 |
| C | 2.00293400  | -2.43907500 | -2.83694400 |
| H | 2.98506000  | -2.68232800 | -2.44092100 |
| C | 2.87262800  | 3.12925100  | 0.85354800  |

|   |             |             |             |
|---|-------------|-------------|-------------|
| C | 2.46377900  | -6.23074100 | -0.84031800 |
| H | 1.47866500  | -6.67828300 | -0.62803000 |
| C | -3.58760300 | -2.66257300 | 5.08874300  |
| H | -3.86066300 | -3.52489100 | 4.45837700  |
| N | -4.93783300 | -0.90998800 | -3.02864500 |
| C | -4.57670600 | -1.53223700 | 4.79156100  |
| H | -4.30396800 | -0.65277100 | 5.39759700  |
| N | -3.78525700 | 4.39210300  | 0.41636100  |
| C | -4.52312600 | -0.22556400 | -0.76033100 |
| C | -4.27465100 | -0.08017900 | 3.00403300  |
| H | -3.99679300 | 0.70376500  | 3.72583900  |
| C | -4.07010300 | -2.00534600 | -5.00021500 |
| H | -4.01083400 | -1.01997100 | -5.49039500 |
| C | -4.50042200 | -0.61713100 | 0.57202800  |
| H | -4.66803100 | -1.65338000 | 0.85410700  |
| C | -4.07354800 | 2.05928900  | -0.09330100 |
| C | -5.20818200 | -1.97662100 | -3.97571300 |
| H | -5.23757500 | -2.95867400 | -3.47530000 |
| C | -4.05139700 | 1.65331600  | 1.24827000  |
| H | -3.87092000 | 2.40290800  | 2.01442800  |
| C | -4.30567800 | 1.11980900  | -1.08980300 |
| H | -4.32741400 | 1.40762700  | -2.13777800 |
| C | -4.26758900 | 0.32348100  | 1.58499100  |
| C | -3.61900700 | 5.75682700  | -0.05051500 |
| H | -3.55303600 | 5.79847100  | -1.15035900 |

|   |             |             |             |
|---|-------------|-------------|-------------|
| C | -3.87569700 | 3.47612900  | -0.45539700 |
| H | -3.82912700 | 3.69136800  | -1.53436800 |
| C | -4.78654500 | -1.22745700 | -1.81075100 |
| H | -4.85839100 | -2.27109000 | -1.46700800 |
| C | -3.64650500 | -3.05726700 | 6.56246900  |
| H | -3.37780000 | -2.20347600 | 7.19162100  |
| H | -4.65245100 | -3.39322100 | 6.83190200  |
| H | -2.94192900 | -3.86690900 | 6.76935600  |
| C | -4.80393200 | 6.59079100  | 0.43058200  |
| H | -4.87123700 | 6.55401900  | 1.52198700  |
| H | -4.69539300 | 7.63359000  | 0.11717700  |
| H | -5.73780400 | 6.19897200  | 0.01936200  |
| C | 5.02688800  | 3.59757200  | -5.16857000 |
| H | 5.91732300  | 3.27302000  | -4.62213600 |
| H | 5.21272200  | 3.49610800  | -6.24210100 |
| H | 4.85570800  | 4.65336300  | -4.94327500 |
| C | 3.30794000  | -7.19471800 | -1.66945100 |
| H | 4.28665600  | -6.75282700 | -1.87827400 |
| H | 3.45160900  | -8.13851300 | -1.13473300 |
| H | 2.81961800  | -7.40656700 | -2.62414900 |
| C | 5.48284500  | 3.63951700  | 4.62894200  |
| H | 4.74789100  | 4.23857100  | 5.17502400  |
| H | 6.25547400  | 3.30332100  | 5.32708300  |
| H | 5.94939600  | 4.27885800  | 3.87507300  |
| H | 4.90425300  | 1.25011200  | 5.74520000  |

|    |             |             |             |
|----|-------------|-------------|-------------|
| H  | -5.57806200 | -1.86468900 | 5.09129600  |
| H  | 4.27559800  | 1.17801800  | -6.12609500 |
| H  | -2.21902100 | 7.35743000  | 0.23138600  |
| H  | 3.30569300  | -6.87592000 | 1.02535500  |
| H  | -4.31006800 | -2.75872500 | -5.76035500 |
| C  | -6.54375500 | -1.70285100 | -4.66239400 |
| H  | -6.76404000 | -2.47794500 | -5.40273500 |
| H  | -7.35300100 | -1.68299100 | -3.92792800 |
| H  | -6.51629500 | -0.73099600 | -5.16418600 |
| C  | 0.99972400  | 0.36975400  | -0.57231200 |
| H  | 1.08517600  | 1.29487400  | -0.01369300 |
| H  | 1.13143200  | 0.38242800  | -1.64779800 |
| C  | 0.83243700  | -0.86378000 | 0.11438300  |
| H  | 0.78969000  | -0.88039900 | 1.19749300  |
| H  | 0.83775700  | -1.79836600 | -0.43392500 |
| Cl | 3.18312900  | -0.47525700 | -0.08492500 |
| Cl | -1.09880000 | -0.06914300 | -0.39899200 |

**Product**

0 1

|   |             |             |             |
|---|-------------|-------------|-------------|
| N | -2.18803300 | -2.65762300 | 4.62704200  |
| N | 3.08005300  | 3.34194400  | 3.39314000  |
| N | 2.88921900  | -4.80947900 | 1.34644800  |
| N | 3.37616700  | 3.46143700  | -2.99644800 |
| N | 3.04810800  | 1.04183000  | -4.53917900 |
| N | 3.26217800  | 0.70590800  | 4.60187600  |

|   |             |             |             |
|---|-------------|-------------|-------------|
| N | -1.97661300 | 5.38523500  | 0.00356600  |
| C | 0.84799400  | -3.33580400 | 2.74038900  |
| H | 0.56523300  | -4.27836100 | 2.27847300  |
| C | 4.13015900  | 1.98079400  | -4.74295300 |
| H | 5.01915800  | 1.74357900  | -4.13638400 |
| N | -2.15775800 | -2.66670000 | -4.53761700 |
| C | 2.05830400  | 0.30980200  | 4.59975700  |
| H | 1.26074800  | 0.86268700  | 5.12049800  |
| N | 3.17608000  | -4.60837100 | -1.52046900 |
| C | 1.64076300  | -0.93760200 | 3.92983500  |
| C | 3.13245400  | -3.63501800 | 1.75850600  |
| H | 4.09437100  | -3.13424000 | 1.57000600  |
| C | 2.15435600  | -2.86273000 | 2.55092800  |
| C | -1.40023400 | -3.17210100 | 3.77761200  |
| H | -1.66545300 | -4.07520900 | 3.20629900  |
| C | -1.34188500 | -1.69888100 | -4.46865900 |
| H | -1.56393500 | -0.71406200 | -4.90777100 |
| C | 2.54507600  | -1.66898800 | 3.14693500  |
| H | 3.55315800  | -1.28428500 | 3.02016200  |
| C | 0.34763200  | -1.41468200 | 4.10992400  |
| H | -0.36837100 | -0.87395400 | 4.72350100  |
| C | -0.05279000 | -2.62339100 | 3.52359200  |
| C | 0.52532400  | 4.26983800  | -0.88179800 |
| H | -0.18982300 | 4.57257400  | -1.64236600 |
| C | 3.29903700  | 3.13756200  | 2.16140900  |



|   |             |             |             |
|---|-------------|-------------|-------------|
| H | 4.23790300  | 2.69235800  | 1.79846000  |
| C | 0.14120400  | 4.34244700  | 0.46539700  |
| C | 0.92967000  | -0.82540000 | -4.01654800 |
| H | 0.68135700  | 0.08173000  | -4.56205300 |
| C | -1.18526600 | 4.86754800  | 0.84743800  |
| H | -1.43023300 | 4.81073500  | 1.91945400  |
| C | -0.00888100 | -1.83633700 | -3.84865600 |
| C | 2.69589100  | 3.44695100  | -0.22040400 |
| H | 3.68281600  | 3.09684200  | -0.51054000 |
| C | 3.25025400  | 0.07340800  | -3.74569600 |
| H | 4.20576000  | -0.06387600 | -3.21689000 |
| C | 0.34509300  | -2.99712900 | -3.14736200 |
| H | -0.40042600 | -3.77902900 | -3.02733800 |
| C | 3.55997400  | 1.93541900  | 5.30336700  |
| H | 2.67763700  | 2.36255500  | 5.80755100  |
| C | 1.99071700  | -4.37726200 | -1.90469400 |
| H | 1.16767500  | -5.08537400 | -1.72141200 |
| C | 1.03876500  | 3.95799500  | 1.45570400  |
| H | 0.76785700  | 4.01024700  | 2.50722200  |
| C | 3.92857900  | -5.48371900 | 0.59861000  |
| H | 4.84434800  | -4.87815800 | 0.50287200  |
| C | 3.67245300  | 3.40468900  | -4.41552600 |
| H | 2.77667600  | 3.62053300  | -5.02107900 |
| C | -3.23482900 | 5.90283600  | 0.49731200  |
| H | -3.33167100 | 5.81094800  | 1.59142500  |

|   |             |             |             |
|---|-------------|-------------|-------------|
| C | 2.22920700  | -0.96771600 | -3.50881900 |
| N | -4.56208700 | -1.97594800 | 3.10649700  |
| C | 2.19399800  | 3.75539300  | -2.64653300 |
| H | 1.40311400  | 3.97588700  | -3.38029800 |
| C | 1.79731900  | 3.82896600  | -1.22650600 |
| C | 4.12523200  | 2.97722800  | 4.33379300  |
| H | 4.98780700  | 2.52528600  | 3.81724800  |
| C | 1.62894700  | -3.14587800 | -2.63479000 |
| C | 2.57273000  | -2.12444100 | -2.81903000 |
| H | 3.57140800  | -2.25800600 | -2.41149500 |
| C | 2.32415500  | 3.51085900  | 1.11679100  |
| C | 3.42809300  | -5.84496400 | -0.80365500 |
| H | 2.50522600  | -6.43781500 | -0.69149100 |
| C | -3.47107700 | -3.30327300 | 4.84179600  |
| H | -3.59790700 | -4.17213300 | 4.17500800  |
| N | -4.55120400 | -1.54217700 | -3.29040800 |
| C | -4.57871300 | -2.29731300 | 4.51630900  |
| H | -4.45335900 | -1.40963800 | 5.15782700  |
| N | -4.41012200 | 3.79816400  | 0.28308000  |
| C | -4.38403800 | -0.85413200 | -0.99234500 |
| C | -4.38934000 | -0.76311800 | 2.78033600  |
| H | -4.27150900 | 0.03274600  | 3.53236800  |
| C | -3.41099100 | -2.43522800 | -5.22409800 |
| H | -3.47026600 | -1.43026400 | -5.67265500 |
| C | -4.37729400 | -1.26770100 | 0.33339200  |

|   |             |             |             |
|---|-------------|-------------|-------------|
| H | -4.39303100 | -2.32359800 | 0.59057100  |
| C | -4.34180600 | 1.45681000  | -0.26770000 |
| C | -4.59432900 | -2.61373900 | -4.26865800 |
| H | -4.49597900 | -3.60090100 | -3.78740700 |
| C | -4.33564500 | 1.02905700  | 1.06680100  |
| H | -4.31767800 | 1.77973700  | 1.85272100  |
| C | -4.36806700 | 0.51584100  | -1.28936800 |
| H | -4.36967300 | 0.82136900  | -2.33258600 |
| C | -4.35931200 | -0.32623000 | 1.37123300  |
| C | -4.41295900 | 5.18040900  | -0.16188400 |
| H | -4.28503800 | 5.24986200  | -1.25480500 |
| C | -4.32562200 | 2.89389400  | -0.60156800 |
| H | -4.24877600 | 3.13255700  | -1.67375100 |
| C | -4.42151700 | -1.86068500 | -2.07043300 |
| H | -4.34476200 | -2.91027300 | -1.74637700 |
| C | -3.55827900 | -3.74959700 | 6.29924100  |
| H | -3.43508100 | -2.88941100 | 6.96402300  |
| H | -4.52598900 | -4.21846800 | 6.50202500  |
| H | -2.76801200 | -4.46994800 | 6.52584000  |
| C | -5.73467300 | 5.82611300  | 0.24786100  |
| H | -5.86388900 | 5.76253100  | 1.33248000  |
| H | -5.76030600 | 6.87847300  | -0.05101400 |
| H | -6.57381800 | 5.30920600  | -0.22479700 |
| C | 4.77300400  | 4.41304800  | -4.73460800 |
| H | 5.66309000  | 4.20024900  | -4.13510200 |

|   |             |             |             |
|---|-------------|-------------|-------------|
| H | 5.04089700  | 4.36948100  | -5.79467100 |
| H | 4.44058200  | 5.42781800  | -4.50116800 |
| C | 4.47827400  | -6.65358500 | -1.56041200 |
| H | 5.39577800  | -6.06798500 | -1.67090300 |
| H | 4.71115600  | -7.57983700 | -1.02635300 |
| H | 4.11610700  | -6.90962500 | -2.55943600 |
| C | 4.56740000  | 4.22957100  | 5.08681000  |
| H | 3.71409900  | 4.67864800  | 5.60380800  |
| H | 5.33922200  | 3.98512300  | 5.82297100  |
| H | 4.97141200  | 4.97001500  | 4.39162200  |
| H | 4.32384700  | 1.72002100  | 6.06035700  |
| H | -5.54423600 | -2.76251000 | 4.75012500  |
| H | 4.41240500  | 1.94636800  | -5.80262700 |
| H | -3.29068800 | 6.96544800  | 0.23098900  |
| H | 4.17858900  | -6.41358400 | 1.12405300  |
| H | -3.49911600 | -3.17969600 | -6.02471300 |
| C | -5.91594700 | -2.53516400 | -5.02880900 |
| H | -5.97118700 | -3.31895900 | -5.79038400 |
| H | -6.75811300 | -2.65627600 | -4.34262300 |
| H | -6.01207100 | -1.56020900 | -5.51599600 |
| C | 0.63715700  | 0.67512600  | -0.67611700 |
| H | 0.68450800  | 1.55275500  | -0.03097900 |
| H | 1.09027400  | 0.90324400  | -1.64315900 |
| C | 1.30425200  | -0.52091100 | -0.02898200 |
| H | 0.93093500  | -0.69886200 | 0.98126000  |

|    |             |             |             |
|----|-------------|-------------|-------------|
| H  | 1.18920500  | -1.42034700 | -0.63493400 |
| Cl | 3.06977400  | -0.19052900 | 0.10167300  |
| Cl | -1.09599200 | 0.30526000  | -0.95491800 |

#### 4. Ring-expansion and contraction reaction

##### Without CC2 cage

##### Reactant

0 1

|   |             |             |             |
|---|-------------|-------------|-------------|
| C | 0.09074800  | 1.38281900  | 0.02831600  |
| C | 1.29696800  | 0.77580800  | 0.16624900  |
| C | 0.43519800  | -1.12917800 | -0.43530100 |
| C | -0.57163600 | -1.21499500 | 0.44394400  |
| C | -1.71457300 | -0.38589300 | 0.02525400  |
| C | -1.29131100 | 0.88365300  | -0.18987100 |
| H | 0.15076700  | 2.45823300  | 0.17476000  |
| H | -0.33102200 | -1.26004300 | 1.50599900  |
| H | -2.76370000 | -0.66538600 | 0.01050300  |
| H | -2.02312800 | 1.66060100  | -0.40924700 |
| O | 1.62908900  | -0.53846900 | -0.05525600 |
| H | 0.28260400  | -1.10345400 | -1.51176500 |
| H | 2.17940000  | 1.34451700  | 0.44024500  |

##### TS

0 1

|   |             |             |             |
|---|-------------|-------------|-------------|
| C | -0.17620300 | 1.43360200  | -0.01203000 |
| C | 0.98946500  | 0.71089400  | 0.42120800  |
| C | 0.64113800  | -0.76253800 | -0.45861600 |

|   |             |             |             |
|---|-------------|-------------|-------------|
| C | -0.40107300 | -1.37536800 | 0.29572600  |
| C | -1.54287400 | -0.63364400 | 0.06785400  |
| C | -1.37217400 | 0.75703000  | -0.24364400 |
| H | -0.24582200 | 2.48658200  | 0.26246400  |
| H | -0.32069200 | -2.25043900 | 0.93162500  |
| H | -2.54341300 | -1.00111700 | 0.27407500  |
| H | -2.26528900 | 1.35086500  | -0.42406100 |
| O | 1.86333100  | -0.22117200 | -0.18188600 |
| H | 0.33783000  | -0.47845400 | -1.46527000 |
| H | 1.30107000  | 0.88208400  | 1.45326300  |

**Product**

0 1

|   |             |             |             |
|---|-------------|-------------|-------------|
| C | -0.31612200 | 1.48287200  | -0.08984900 |
| C | 0.77986200  | 0.60361900  | 0.41525000  |
| C | 0.77992500  | -0.60351300 | -0.41544300 |
| C | -0.31561600 | -1.48282700 | 0.09066100  |
| C | -1.44885300 | -0.73386200 | 0.12006200  |
| C | -1.44896600 | 0.73340400  | -0.12062400 |
| H | -0.31911900 | 2.56547600  | -0.17609100 |
| H | -0.31690300 | -2.56519900 | 0.17788800  |
| H | -2.41456500 | -1.20871200 | 0.27068500  |
| H | -2.41496700 | 1.20785900  | -0.27088500 |
| O | 1.99814900  | 0.00030600  | -0.00022400 |
| H | 0.64928500  | -0.41099200 | -1.48391000 |
| H | 0.64970300  | 0.41096200  | 1.48376000  |

**With CC2 cage**

**Reactant**

0 1

|   |             |             |             |
|---|-------------|-------------|-------------|
| N | -1.81020200 | -3.42502900 | 4.41814600  |
| N | 5.44885500  | -1.41778600 | 1.41466700  |
| N | -1.32657100 | -5.44057300 | -1.66139900 |
| N | 3.68851300  | 2.13165900  | -3.66114500 |
| N | 1.18226000  | 1.74808200  | -5.13866200 |
| N | 3.96961900  | -3.92210800 | 1.66128700  |
| N | 2.86450000  | 4.42631700  | 2.26204200  |
| C | -1.03400700 | -4.38718600 | 0.99289000  |
| H | -2.03949100 | -4.58402900 | 0.63014000  |
| C | 2.48099500  | 1.91345000  | -5.76044500 |
| H | 2.98433100  | 0.95017100  | -5.94410800 |
| N | -4.80915400 | 1.86279000  | -2.77253600 |
| C | 2.94369600  | -3.66131100 | 2.35854400  |
| H | 3.02036500  | -3.26374900 | 3.38250600  |
| N | -1.92872600 | -3.75490600 | -3.97718300 |
| C | 1.57128200  | -3.89846200 | 1.86945200  |
| C | -0.18409800 | -5.06758700 | -1.25889600 |
| H | 0.70600300  | -5.10766500 | -1.90592800 |
| C | 0.04314100  | -4.58073700 | 0.11639000  |
| C | -1.96067200 | -3.74549200 | 3.20133200  |
| H | -2.95599100 | -3.89239900 | 2.75422900  |
| C | -3.61586100 | 2.07706900  | -3.14280300 |

|   |             |             |             |
|---|-------------|-------------|-------------|
| H | -3.20369800 | 3.09447700  | -3.22676200 |
| C | 1.33792800  | -4.33277400 | 0.55639400  |
| H | 2.19102400  | -4.47897500 | -0.10156500 |
| C | 0.49638700  | -3.71048400 | 2.72999900  |
| H | 0.64906900  | -3.37131900 | 3.75129700  |
| C | -0.81425400 | -3.95260500 | 2.29431000  |
| C | 3.44114200  | 2.97620900  | -0.13325700 |
| H | 2.99965400  | 3.96533700  | -0.22390500 |
| C | 5.14938900  | -0.90939200 | 0.29263900  |
| H | 5.34986300  | -1.43423000 | -0.65506500 |
| C | 3.61076700  | 2.43427100  | 1.14920200  |
| C | -1.46895300 | 1.28355400  | -4.08538500 |
| H | -1.16980100 | 2.31592500  | -4.24985600 |
| C | 3.23664900  | 3.21732300  | 2.34422300  |
| H | 3.31977700  | 2.69413000  | 3.30970500  |
| C | -2.69712700 | 0.98286600  | -3.51222100 |
| C | 4.36417700  | 0.97315000  | -1.10553900 |
| H | 4.64149300  | 0.41666000  | -1.99772100 |
| C | 0.73401100  | 0.56515100  | -5.03404600 |
| H | 1.31791200  | -0.30669000 | -5.36956900 |
| C | -3.05674300 | -0.35818200 | -3.31254800 |
| H | -4.02534300 | -0.57488500 | -2.86889300 |
| C | 5.26288500  | -3.68094700 | 2.26535600  |
| H | 5.18438600  | -3.27179600 | 3.28586900  |
| C | -2.61267700 | -2.78829200 | -3.52422600 |



|   |             |             |             |
|---|-------------|-------------|-------------|
| H | -3.56979900 | -2.94458600 | -3.00260700 |
| C | 4.15062200  | 1.16185300  | 1.28977800  |
| H | 4.29259700  | 0.71805100  | 2.27186300  |
| C | -1.43626000 | -5.92584400 | -3.01994600 |
| H | -0.47395100 | -5.90973600 | -3.55727300 |
| C | 3.39787800  | 2.80093500  | -4.91895700 |
| H | 2.88094500  | 3.75955500  | -4.74698000 |
| C | 2.52996200  | 5.11654000  | 3.48781700  |
| H | 2.67975800  | 4.49213400  | 4.38379700  |
| C | -0.58914000 | 0.25874000  | -4.46003700 |
| N | -3.19839000 | -0.87107900 | 4.65961500  |
| C | 3.53006600  | 2.80187900  | -2.59546800 |
| H | 3.15142400  | 3.83651900  | -2.61166400 |
| C | 3.80580400  | 2.24897100  | -1.25701300 |
| C | 6.09222100  | -2.72045300 | 1.41083400  |
| H | 6.14720800  | -3.13519900 | 0.39062900  |
| C | -2.19738700 | -1.38159500 | -3.69287100 |
| C | -0.95900800 | -1.06552700 | -4.26897400 |
| H | -0.29788900 | -1.87905000 | -4.55630400 |
| C | 4.53944300  | 0.42763800  | 0.15943000  |
| C | -2.45551400 | -5.09748400 | -3.80626400 |
| H | -3.39746000 | -5.08824300 | -3.23325100 |
| C | -3.00494700 | -3.25022100 | 5.22472400  |
| H | -3.91765600 | -3.40633100 | 4.62626600  |
| N | -4.93662000 | 3.04336000  | -0.12055700 |

|   |             |             |             |
|---|-------------|-------------|-------------|
| C | -3.02562200 | -1.81097400 | 5.74668400  |
| H | -2.10353300 | -1.62984400 | 6.32310600  |
| N | 0.21167400  | 4.41896400  | 3.48915200  |
| C | -3.54666100 | 2.07599900  | 1.59157500  |
| C | -2.30795400 | 0.01919700  | 4.50876400  |
| H | -1.43006600 | 0.08179900  | 5.17096900  |
| C | -5.62206400 | 3.01338600  | -2.44250900 |
| H | -5.08914400 | 3.96693900  | -2.58935000 |
| C | -3.42361900 | 1.04548900  | 2.51509000  |
| H | -4.12989100 | 0.21918800  | 2.52810400  |
| C | -1.60019100 | 3.15601600  | 2.54351800  |
| C | -6.09549600 | 2.93095400  | -0.98839600 |
| H | -6.60260900 | 1.96094100  | -0.85472600 |
| C | -1.49451500 | 2.11885100  | 3.48082700  |
| H | -0.69487400 | 2.16401900  | 4.21580800  |
| C | -2.62383500 | 3.13099800  | 1.60383000  |
| H | -2.72859000 | 3.92435500  | 0.86818000  |
| C | -2.39959700 | 1.06623200  | 3.47245800  |
| C | 1.07328000  | 5.58707500  | 3.45462700  |
| H | 0.92456300  | 6.16899500  | 2.53016200  |
| C | -0.64541300 | 4.28216900  | 2.56433000  |
| H | -0.73686000 | 5.00459800  | 1.73855200  |
| C | -4.67157300 | 2.06153600  | 0.63662700  |
| H | -5.28868700 | 1.14927700  | 0.64344500  |
| C | -2.96711700 | -4.24295500 | 6.38396800  |

|   |             |             |             |
|---|-------------|-------------|-------------|
| H | -2.06512500 | -4.08731100 | 6.98338800  |
| H | -3.84459600 | -4.12032700 | 7.02611500  |
| H | -2.95196000 | -5.26905500 | 6.00750500  |
| C | 0.76309200  | 6.45731800  | 4.67101400  |
| H | 0.91005100  | 5.88371700  | 5.59111700  |
| H | 1.41426800  | 7.33649500  | 4.69347400  |
| H | -0.27645200 | 6.79409900  | 4.64324300  |
| C | 4.71456100  | 3.05098200  | -5.65316900 |
| H | 5.24204700  | 2.10552600  | -5.81188900 |
| H | 4.53363700  | 3.52223200  | -6.62410900 |
| H | 5.36085400  | 3.70586300  | -5.06296700 |
| C | -2.69356500 | -5.70756900 | -5.18584800 |
| H | -1.75988600 | -5.72399200 | -5.75603600 |
| H | -3.07207500 | -6.73035500 | -5.09610800 |
| H | -3.42210400 | -5.11427900 | -5.74441300 |
| C | 7.49963500  | -2.57215300 | 1.98527900  |
| H | 7.45127400  | -2.15734400 | 2.99655700  |
| H | 8.00566900  | -3.54165700 | 2.02391100  |
| H | 8.09377300  | -1.89345100 | 1.36787700  |
| H | 5.79521100  | -4.63898200 | 2.31633500  |
| H | -3.88309000 | -1.70587500 | 6.42313300  |
| H | 2.32665700  | 2.40935900  | -6.72749400 |
| H | 3.17560600  | 5.99987300  | 3.56626100  |
| H | -1.79500100 | -6.96185700 | -2.98031500 |
| H | -6.50598000 | 3.00440300  | -3.09208400 |

|   |             |             |             |
|---|-------------|-------------|-------------|
| C | -7.06128700 | 4.06974400  | -0.67085000 |
| H | -7.93825500 | 4.02700900  | -1.32405200 |
| H | -7.39704400 | 4.00639900  | 0.36743200  |
| H | -6.56332800 | 5.03416900  | -0.80859400 |
| C | 1.19006000  | 0.40663100  | -1.58817000 |
| C | 0.59726400  | 1.62387400  | -1.66886200 |
| C | -0.19140000 | 1.39001800  | 0.34018300  |
| C | -0.83059200 | 0.22061200  | 0.20580100  |
| C | 0.11328600  | -0.90785400 | 0.27599000  |
| C | 1.10850100  | -0.71919000 | -0.62474100 |
| H | 1.82905400  | 0.21587500  | -2.45037100 |
| H | -1.65738300 | 0.16214900  | -0.50464800 |
| H | 0.00563900  | -1.82183600 | 0.85024500  |
| H | 1.85315200  | -1.50373100 | -0.76978100 |
| O | -0.15713700 | 2.28122900  | -0.72248500 |
| H | 0.63617800  | 1.54087200  | 1.03214300  |
| H | 0.73511200  | 2.24154500  | -2.55369900 |

**TS**

0 1

|   |             |             |             |
|---|-------------|-------------|-------------|
| N | 0.56887000  | -0.68793100 | -5.69856300 |
| N | -5.55955700 | -2.02896700 | -0.59266100 |
| N | 2.38723600  | -5.04929800 | -1.39288800 |
| N | -2.50153300 | -0.49834300 | 4.86058000  |
| N | 0.41651600  | -0.83603000 | 5.30944000  |
| N | -3.86775700 | -3.74261000 | -2.22832700 |

|   |             |             |             |
|---|-------------|-------------|-------------|
| N | -4.08427800 | 4.10932400  | 0.74253900  |
| C | 1.10220400  | -3.04099400 | -2.97945700 |
| H | 2.18648300  | -3.10930800 | -3.01724800 |
| C | -0.63252700 | -1.26461400 | 6.21291900  |
| H | -0.95848600 | -2.29965100 | 6.01919400  |
| N | 5.32393600  | 1.70463800  | 1.99534700  |
| C | -3.16143200 | -2.91984400 | -2.88517200 |
| H | -3.61442300 | -2.15895600 | -3.53985300 |
| N | 3.64304700  | -4.46809600 | 1.14283800  |
| C | -1.68535400 | -2.94168200 | -2.87007000 |
| C | 1.14479500  | -4.84073100 | -1.24805800 |
| H | 0.54063400  | -5.39613700 | -0.51320400 |
| C | 0.41056300  | -3.87113900 | -2.08589700 |
| C | 1.15327400  | -1.35687600 | -4.79422400 |
| H | 2.25048000  | -1.38662800 | -4.70706700 |
| C | 4.34241000  | 1.41025600  | 2.74224400  |
| H | 3.88041000  | 2.15074500  | 3.41372900  |
| C | -0.97757500 | -3.81537300 | -2.03170300 |
| H | -1.53919400 | -4.45943800 | -1.35918100 |
| C | -0.98836100 | -2.12424500 | -3.75116600 |
| H | -1.51411300 | -1.44925700 | -4.42161200 |
| C | 0.41073100  | -2.17342800 | -3.81416400 |
| C | -3.59250500 | 1.72425200  | 2.20047700  |
| H | -3.21927000 | 2.66321500  | 2.59981900  |
| C | -4.97771300 | -1.94552700 | 0.53058600  |

|   |             |             |             |
|---|-------------|-------------|-------------|
| H | -4.78983400 | -2.83403300 | 1.15395200  |
| C | -4.17103600 | 1.72478700  | 0.92423400  |
| C | 2.66431200  | -0.17767100 | 3.61540000  |
| H | 2.28847800  | 0.60149200  | 4.27449800  |
| C | -4.30111900 | 2.99373500  | 0.18168200  |
| H | -4.60515500 | 2.91501600  | -0.87386800 |
| C | 3.73856500  | 0.06557000  | 2.76879000  |
| C | -3.94564500 | -0.65307800 | 2.36547200  |
| H | -3.84087200 | -1.57070500 | 2.93945400  |
| C | 0.91055100  | -1.71251200 | 4.53618100  |
| H | 0.53081700  | -2.74624200 | 4.51245500  |
| C | 4.21352400  | -0.95955400 | 1.93887800  |
| H | 5.05298300  | -0.74984100 | 1.28045900  |
| C | -5.30506600 | -3.64385200 | -2.37719400 |
| H | -5.60232900 | -2.86471200 | -3.09801600 |
| C | 4.10125400  | -3.28787500 | 1.07673100  |
| H | 4.88515000  | -3.00374200 | 0.35715600  |
| C | -4.61523400 | 0.53008500  | 0.37188200  |
| H | -5.05601700 | 0.49962000  | -0.62138200 |
| C | 3.00456900  | -6.05597900 | -0.55694400 |
| H | 2.29526200  | -6.51164800 | 0.15325300  |
| C | -1.84962400 | -0.34388000 | 6.15065000  |
| H | -1.50291000 | 0.69198900  | 6.29981200  |
| C | -4.19730700 | 5.30960600  | -0.05229800 |
| H | -4.52177600 | 5.11204600  | -1.08719300 |

|   |             |             |             |
|---|-------------|-------------|-------------|
| C | 2.04642000  | -1.43484800 | 3.63747200  |
| N | 1.49378300  | 1.99924900  | -5.15068900 |
| C | -2.77231300 | 0.56007900  | 4.21464200  |
| H | -2.48683000 | 1.55677500  | 4.58676200  |
| C | -3.46815800 | 0.54298200  | 2.91618800  |
| C | -5.97673900 | -3.34848200 | -1.03363900 |
| H | -5.66263100 | -4.12648200 | -0.31812600 |
| C | 3.61332100  | -2.21210400 | 1.96128100  |
| C | 2.52511200  | -2.44360600 | 2.81310600  |
| H | 2.06198600  | -3.42696400 | 2.80622400  |
| C | -4.51018700 | -0.66670500 | 1.09674100  |
| C | 4.17585300  | -5.46058700 | 0.22848300  |
| H | 4.87535700  | -5.00654700 | -0.49281700 |
| C | 1.39648400  | 0.05774900  | -6.62989500 |
| H | 2.46847400  | -0.08528800 | -6.41550900 |
| N | 4.25161900  | 3.82391800  | 0.34142300  |
| C | 1.07985900  | 1.54733500  | -6.46101400 |
| H | 0.00422900  | 1.70277100  | -6.64492400 |
| N | -1.91119100 | 5.21987400  | -0.84209100 |
| C | 2.48035600  | 3.33302400  | -1.22483700 |
| C | 0.59087700  | 2.41382400  | -4.36307200 |
| H | -0.46892800 | 2.45281700  | -4.65966000 |
| C | 5.80489900  | 3.06845300  | 2.04599000  |
| H | 5.27060600  | 3.67855700  | 2.79244100  |
| C | 2.18838900  | 2.81000700  | -2.47887400 |

|   |             |             |             |
|---|-------------|-------------|-------------|
| H | 2.95899300  | 2.33279100  | -3.07889400 |
| C | 0.18389900  | 4.06958200  | -1.00064600 |
| C | 5.66372700  | 3.73271500  | 0.67365200  |
| H | 6.20520100  | 3.11177800  | -0.05911800 |
| C | -0.09835400 | 3.53708100  | -2.26615700 |
| H | -1.10392800 | 3.65114300  | -2.66258500 |
| C | 1.46711000  | 3.95207700  | -0.47774800 |
| H | 1.71172300  | 4.35772500  | 0.50074100  |
| C | 0.89508100  | 2.90971400  | -3.00702000 |
| C | -2.84678500 | 6.03205800  | -0.08554400 |
| H | -2.51168400 | 6.16705000  | 0.95594300  |
| C | -0.85247600 | 4.82567600  | -0.26612700 |
| H | -0.62859900 | 5.06177000  | 0.78496500  |
| C | 3.86979100  | 3.26530400  | -0.73119500 |
| H | 4.57151500  | 2.71659100  | -1.37947800 |
| C | 1.08335500  | -0.40426800 | -8.05044400 |
| H | 0.02116600  | -0.25770200 | -8.26788400 |
| H | 1.67518900  | 0.15820600  | -8.77897100 |
| H | 1.30975100  | -1.46750600 | -8.16460200 |
| C | -2.97670800 | 7.39013100  | -0.77138000 |
| H | -3.31809200 | 7.25947500  | -1.80264500 |
| H | -3.69161500 | 8.02469500  | -0.23875800 |
| H | -2.00972700 | 7.89922600  | -0.79601600 |
| C | -2.85078700 | -0.71410800 | 7.24462800  |
| H | -3.20399800 | -1.73968300 | 7.10011200  |



|   |             |             |             |
|---|-------------|-------------|-------------|
| H | -2.39046000 | -0.63468500 | 8.23421100  |
| H | -3.71706100 | -0.04843500 | 7.20845600  |
| C | 4.88998100  | -6.54398600 | 1.03330900  |
| H | 4.20081000  | -6.99150000 | 1.75570100  |
| H | 5.26958800  | -7.32937800 | 0.37261600  |
| H | 5.73114600  | -6.11695100 | 1.58550600  |
| C | -7.49655600 | -3.36325500 | -1.18025400 |
| H | -7.81340000 | -2.59148400 | -1.88813500 |
| H | -7.84143000 | -4.33736700 | -1.54043300 |
| H | -7.97404500 | -3.15852900 | -0.21852000 |
| H | -5.67437500 | -4.61093500 | -2.74015100 |
| H | 1.64731200  | 2.10825500  | -7.21335900 |
| H | -0.22566300 | -1.21855300 | 7.23142600  |
| H | -4.93091000 | 5.97077300  | 0.42490800  |
| H | 3.39551400  | -6.84506200 | -1.21144000 |
| H | 6.86940200  | 3.04903200  | 2.30944000  |
| C | 6.25444500  | 5.14060800  | 0.69547000  |
| H | 7.31302800  | 5.11101900  | 0.97130700  |
| H | 6.16391500  | 5.60758500  | -0.28865500 |
| H | 5.71730800  | 5.76243800  | 1.41778800  |
| C | -0.75289900 | -0.73432600 | 1.75555400  |
| C | -0.34649500 | 0.60159000  | 2.10196500  |
| C | 0.12529000  | 1.08250000  | 0.48623000  |
| C | 1.37028400  | 0.42079900  | 0.27348900  |
| C | 1.08229600  | -0.91863200 | 0.09877300  |

|   |             |             |             |
|---|-------------|-------------|-------------|
| C | -0.09560200 | -1.42771500 | 0.74216000  |
| H | -1.24283600 | -1.31735900 | 2.53949100  |
| H | 2.35766500  | 0.87364100  | 0.26566800  |
| H | 1.77801400  | -1.62994300 | -0.33958000 |
| H | -0.32639000 | -2.48353800 | 0.61149600  |
| O | -0.41728900 | 1.86657500  | 1.46525400  |
| H | -0.66308900 | 0.75648900  | -0.19190200 |
| H | 0.14079700  | 0.70614500  | 3.07475500  |

**Product**

0 1

|   |             |             |             |
|---|-------------|-------------|-------------|
| N | -4.50299600 | -1.91755500 | 3.15215700  |
| N | 2.21421600  | 2.47470900  | 4.67709300  |
| N | 0.79505100  | -5.42275700 | 2.04653300  |
| N | 5.11763000  | 2.24978300  | -1.04796400 |
| N | 5.01156800  | -0.00905500 | -2.86250300 |
| N | 1.13575800  | -0.08019200 | 5.56233800  |
| N | -0.28782300 | 5.68518000  | -0.27412900 |
| C | -1.24226900 | -3.46345100 | 2.65871800  |
| H | -1.54444200 | -4.34158100 | 2.09319100  |
| C | 6.23989300  | 0.66937400  | -2.51153800 |
| H | 6.74162500  | 0.21595000  | -1.64107800 |
| N | -0.52137200 | -2.24220800 | -5.16393500 |
| C | -0.00888400 | -0.12791400 | 5.01966300  |
| H | -0.77581300 | 0.64053300  | 5.20296500  |
| N | 2.40452600  | -5.37834700 | -0.39319200 |

|   |             |             |             |
|---|-------------|-------------|-------------|
| C | -0.41631400 | -1.24939500 | 4.14907800  |
| C | 1.10675400  | -4.34500800 | 2.63676300  |
| H | 2.14517900  | -4.11942600 | 2.92634200  |
| C | 0.10907600  | -3.32321500 | 3.00981400  |
| C | -3.59753000 | -2.68102100 | 2.69977300  |
| H | -3.82898800 | -3.53953000 | 2.05009200  |
| C | 0.46906200  | -1.55381300 | -4.77451700 |
| H | 0.72931500  | -0.58881400 | -5.23689500 |
| C | 0.51360300  | -2.21930100 | 3.75041100  |
| H | 1.55067300  | -2.09845700 | 4.05277200  |
| C | -1.74812800 | -1.38640000 | 3.77852400  |
| H | -2.49110500 | -0.65160900 | 4.07790900  |
| C | -2.17047300 | -2.49986400 | 3.03754600  |
| C | 2.02125000  | 3.95544600  | -0.15864100 |
| H | 1.77554900  | 4.40311600  | -1.11755100 |
| C | 2.88111000  | 2.19693600  | 3.63537300  |
| H | 3.73591100  | 1.50299300  | 3.65695900  |
| C | 1.15839600  | 4.18078000  | 0.92425700  |
| C | 2.56978700  | -1.35082800 | -3.47667800 |
| H | 2.82801500  | -0.45623500 | -4.03848500 |
| C | -0.04610100 | 5.01957500  | 0.77644500  |
| H | -0.71465100 | 5.04832000  | 1.65152900  |
| C | 1.37465000  | -2.01871100 | -3.70511300 |
| C | 3.41904400  | 2.57526400  | 1.24511600  |
| H | 4.30302200  | 1.95049900  | 1.34578400  |

|   |             |             |             |
|---|-------------|-------------|-------------|
| C | 4.72262200  | -1.07824700 | -2.24469300 |
| H | 5.37531700  | -1.49746800 | -1.46268500 |
| C | 1.06481900  | -3.15545000 | -2.94564100 |
| H | 0.12264700  | -3.66382700 | -3.13341300 |
| C | 1.41617900  | 1.03358100  | 6.44283000  |
| H | 0.55362600  | 1.70939400  | 6.56138400  |
| C | 1.61561700  | -4.85090000 | -1.23416100 |
| H | 0.63240000  | -5.29031000 | -1.46358100 |
| C | 1.43938100  | 3.60456800  | 2.15607400  |
| H | 0.78765300  | 3.76689200  | 3.01092100  |
| C | 1.86420700  | -6.35565100 | 1.75941300  |
| H | 2.84168100  | -6.00906800 | 2.13271100  |
| C | 5.96799000  | 2.14734900  | -2.22195300 |
| H | 5.47613600  | 2.58069100  | -3.10835400 |
| C | -1.49287700 | 6.48566000  | -0.29239300 |
| H | -2.04695000 | 6.44471400  | 0.65985600  |
| C | 3.47560000  | -1.82047500 | -2.51412400 |
| N | -5.81234500 | -0.71776800 | 0.87929900  |
| C | 4.05957000  | 2.94418000  | -1.14370900 |
| H | 3.76586800  | 3.43179800  | -2.08656800 |
| C | 3.15076000  | 3.16221100  | -0.00088200 |
| C | 2.60698100  | 1.84432200  | 5.92383300  |
| H | 3.45103200  | 1.15063500  | 5.77462100  |
| C | 1.95536400  | -3.63054500 | -1.99120500 |
| C | 3.17135400  | -2.96176500 | -1.78442400 |

|   |             |             |             |
|---|-------------|-------------|-------------|
| H | 3.85780300  | -3.34967200 | -1.03555500 |
| C | 2.57330700  | 2.79629700  | 2.32313800  |
| C | 1.97166500  | -6.60607400 | 0.25260000  |
| H | 0.97719100  | -6.91698600 | -0.10776200 |
| C | -5.88048900 | -2.21945100 | 2.80111600  |
| H | -5.93415500 | -3.05924500 | 2.08885300  |
| N | -2.83998200 | -0.51369000 | -4.79798600 |
| C | -6.49473200 | -0.99040200 | 2.12440200  |
| H | -6.45872000 | -0.13993700 | 2.82491600  |
| N | -2.95647000 | 4.72230900  | -1.10420000 |
| C | -3.54533700 | 0.17801100  | -2.60459500 |
| C | -5.27900900 | 0.42375300  | 0.73693300  |
| H | -5.34498000 | 1.19990300  | 1.51558700  |
| C | -1.31885000 | -1.71394600 | -6.24943200 |
| H | -0.94588200 | -0.74461900 | -6.61843300 |
| C | -4.30150000 | -0.15304300 | -1.48691400 |
| H | -4.73357300 | -1.14418900 | -1.37551900 |
| C | -3.21411700 | 2.40882400  | -1.71751400 |
| C | -2.77643000 | -1.54808400 | -5.81516900 |
| H | -3.12756900 | -2.51720700 | -5.42356800 |
| C | -3.98077400 | 2.06771900  | -0.59598700 |
| H | -4.14111100 | 2.81999400  | 0.17248900  |
| C | -2.99094200 | 1.46047500  | -2.70838200 |
| H | -2.39085400 | 1.70179700  | -3.58171300 |
| C | -4.51877200 | 0.79029200  | -0.47348600 |

|   |             |             |             |
|---|-------------|-------------|-------------|
| C | -2.42191000 | 6.03597400  | -1.42309200 |
| H | -1.82867000 | 6.01082300  | -2.35172100 |
| C | -2.66414100 | 3.76915200  | -1.88758300 |
| H | -2.00999900 | 3.90685200  | -2.76024300 |
| C | -3.36973500 | -0.81165300 | -3.68544000 |
| H | -3.75823800 | -1.82087000 | -3.47652000 |
| C | -6.64500000 | -2.57079100 | 4.07539900  |
| H | -6.58730000 | -1.74340100 | 4.78885600  |
| H | -7.69696300 | -2.77209800 | 3.85104000  |
| H | -6.21384000 | -3.45749200 | 4.54737800  |
| C | -3.58827200 | 7.00928600  | -1.57812900 |
| H | -4.16806600 | 7.05265800  | -0.65111000 |
| H | -3.22556300 | 8.01384100  | -1.81657600 |
| H | -4.25481300 | 6.68001300  | -2.37944600 |
| C | 7.27509900  | 2.88716700  | -1.94302900 |
| H | 7.76138700  | 2.47006400  | -1.05605300 |
| H | 7.95766100  | 2.80147700  | -2.79415100 |
| H | 7.08098100  | 3.94676700  | -1.75756300 |
| C | 2.99488100  | -7.70095500 | -0.03888500 |
| H | 3.98144400  | -7.40094800 | 0.32687700  |
| H | 2.70686900  | -8.63832600 | 0.44666300  |
| H | 3.07041700  | -7.87529400 | -1.11523900 |
| C | 2.99646700  | 2.92907300  | 6.92509700  |
| H | 2.15908000  | 3.61599300  | 7.08007400  |
| H | 3.27437000  | 2.48632500  | 7.88643100  |

|   |             |             |             |
|---|-------------|-------------|-------------|
| H | 3.84466100  | 3.50733900  | 6.54965100  |
| H | 1.67839500  | 0.62745800  | 7.42747200  |
| H | -7.54557400 | -1.21313900 | 1.90151200  |
| H | 6.91882600  | 0.61093700  | -3.37181800 |
| H | -1.20371500 | 7.52687100  | -0.48163800 |
| H | 1.62348500  | -7.30784100 | 2.24779100  |
| H | -1.28619800 | -2.43616000 | -7.07457900 |
| C | -3.64335600 | -1.12301600 | -6.99863100 |
| H | -3.59674600 | -1.86770600 | -7.79912900 |
| H | -4.68505400 | -1.01095900 | -6.68697100 |
| H | -3.30001200 | -0.16050400 | -7.38943000 |
| C | 1.70321200  | 0.36542200  | -0.78230600 |
| C | 0.50981200  | 1.02661600  | -1.39083100 |
| C | -0.40233000 | 1.35917500  | -0.29385900 |
| C | -1.13627000 | 0.10937800  | 0.06673100  |
| C | -0.20171700 | -0.85457900 | 0.27679200  |
| C | 1.23948800  | -0.65718000 | -0.01636000 |
| H | 2.74631000  | 0.47958900  | -1.06450400 |
| H | -2.16907500 | 0.00967800  | 0.38681400  |
| H | -0.48452400 | -1.79502700 | 0.74194400  |
| H | 1.92532000  | -1.40700600 | 0.37103800  |
| O | -0.19947800 | 2.26507100  | -1.37708600 |
| H | 0.09931800  | 1.77268400  | 0.58624000  |
| H | 0.06105500  | 0.38650900  | -2.15796900 |

##### 5. 1,5-sigmatropic shift reaction

**Without CC2 cage**

**Reactant**

0 1

|   |             |             |             |
|---|-------------|-------------|-------------|
| C | 1.57327700  | -0.85580000 | -0.15858100 |
| C | 1.18306600  | 0.56345000  | 0.13056000  |
| C | -0.04731400 | 1.08991700  | 0.08012700  |
| C | -1.30051100 | 0.38410900  | -0.22665100 |
| C | -1.63012600 | -0.83969600 | 0.19282500  |
| H | 2.51221500  | -0.88602000 | -0.72023300 |
| H | 2.00109700  | 1.23658900  | 0.38267400  |
| H | -0.14580400 | 2.16046400  | 0.25478800  |
| H | -2.02275000 | 0.94119600  | -0.82341100 |
| H | -2.57937600 | -1.29184900 | -0.07687900 |
| H | 0.80160900  | -1.37427700 | -0.73305800 |
| H | 1.73814100  | -1.42102800 | 0.76721200  |
| H | -0.97548300 | -1.41695100 | 0.83923000  |

**TS**

0 1

|   |             |             |             |
|---|-------------|-------------|-------------|
| C | -1.30269300 | -0.90370500 | 0.02043900  |
| C | -1.20627000 | 0.50486500  | 0.01410500  |
| C | -0.00024400 | 1.18297500  | -0.15535500 |
| C | 1.20593300  | 0.50519600  | 0.01388500  |
| C | 1.30316500  | -0.90339600 | 0.02066800  |
| H | -2.17453200 | -1.32960500 | 0.51620200  |
| H | -2.03962800 | 1.08776800  | 0.40304400  |



|   |             |             |             |
|---|-------------|-------------|-------------|
| H | -0.00035100 | 2.26691800  | -0.08659700 |
| H | 2.03927600  | 1.08855100  | 0.40217200  |
| H | 2.17517700  | -1.32863400 | 0.51666900  |
| H | 0.00014600  | -1.19097700 | 0.52489500  |
| H | -1.03906400 | -1.45473500 | -0.87966000 |
| H | 1.03962700  | -1.45489500 | -0.87917600 |

**Product**

0 1

|   |             |             |             |
|---|-------------|-------------|-------------|
| C | -1.25949300 | -0.93250500 | 0.04203900  |
| C | -1.19907000 | 0.54086500  | 0.00690500  |
| C | -0.02904400 | 1.18297500  | -0.15535500 |
| C | 1.21313300  | 0.46919600  | 0.02108500  |
| C | 1.34636500  | -0.87459600 | -0.00093200 |
| H | -2.14573200 | -1.33680500 | 0.53780200  |
| H | -2.07562800 | 1.10936800  | 0.30944400  |
| H | -0.00755100 | 2.26691800  | -0.08659700 |
| H | 2.00327600  | 1.06695100  | 0.49577200  |
| H | 2.20397700  | -1.32143400 | 0.49506900  |
| H | -0.65505400 | -1.19097700 | 0.52489500  |
| H | -1.17586400 | -1.40433500 | -0.97326000 |
| H | 0.90282700  | -1.50529500 | -0.78557600 |

**With CC2 cage**

**Reactant**

0 1

|   |             |            |             |
|---|-------------|------------|-------------|
| N | -3.34057800 | 2.53730000 | -4.00928600 |
|---|-------------|------------|-------------|

|   |             |             |             |
|---|-------------|-------------|-------------|
| N | 4.71269400  | 1.28289400  | -3.08304400 |
| N | -1.17848200 | 5.63795700  | 1.18223200  |
| N | 4.94574600  | -1.39058700 | 2.76978600  |
| N | 2.95790700  | -0.75683500 | 4.81426900  |
| N | 2.95097700  | 3.60518600  | -3.29375900 |
| N | 2.42239800  | -4.64553000 | -2.16011300 |
| C | -1.63164800 | 4.10021600  | -1.20265000 |
| H | -2.49388800 | 4.36523000  | -0.59611000 |
| C | 4.38795200  | -0.76463600 | 5.03858600  |
| H | 4.85272500  | 0.21692500  | 4.84984000  |
| N | -3.41135300 | -1.50777500 | 4.37167300  |
| C | 1.79498200  | 3.16235000  | -3.56792600 |
| H | 1.59841200  | 2.55958500  | -4.46826600 |
| N | -0.81452600 | 4.32037300  | 3.73916400  |
| C | 0.61831500  | 3.45888700  | -2.72636600 |
| C | -0.18955000 | 5.21285900  | 0.51300000  |
| H | 0.84986800  | 5.38601400  | 0.83232100  |
| C | -0.35639700 | 4.47014100  | -0.75142700 |
| C | -3.13340400 | 3.04398100  | -2.86631400 |
| H | -3.95421700 | 3.25211600  | -2.16242500 |
| C | -2.14881400 | -1.62176900 | 4.34638800  |
| H | -1.64878800 | -2.59682500 | 4.46002200  |
| C | 0.76066900  | 4.14494700  | -1.51184900 |
| H | 1.75954700  | 4.42605700  | -1.18806900 |
| C | -0.64888900 | 3.09046400  | -3.16066700 |

|   |             |             |             |
|---|-------------|-------------|-------------|
| H | -0.78684100 | 2.55410000  | -4.09583900 |
| C | -1.78207800 | 3.41266700  | -2.40065100 |
| C | 3.59502100  | -2.79346200 | -0.30425400 |
| H | 3.27285700  | -3.76149800 | 0.07176900  |
| C | 4.80100000  | 0.99341500  | -1.85177200 |
| H | 5.20082200  | 1.70442100  | -1.11194900 |
| C | 3.40448000  | -2.50746200 | -1.66341600 |
| C | 0.12023200  | -0.62353600 | 4.31703800  |
| H | 0.55052700  | -1.60189100 | 4.51659600  |
| C | 2.77562100  | -3.49560900 | -2.56081000 |
| H | 2.63825800  | -3.17372700 | -3.60524400 |
| C | -1.25373300 | -0.45796000 | 4.19032300  |
| C | 4.56150300  | -0.60944300 | 0.02511100  |
| H | 5.00214900  | 0.11769100  | 0.70231900  |
| C | 2.43453000  | 0.32873800  | 4.42037200  |
| H | 3.03478100  | 1.23589600  | 4.24869400  |
| C | -1.77722900 | 0.81901900  | 3.94539500  |
| H | -2.85528600 | 0.93048900  | 3.86049500  |
| C | 4.02176600  | 3.30377100  | -4.21954600 |
| H | 3.68890700  | 2.68129900  | -5.06616000 |
| C | -1.51146600 | 3.26407800  | 3.66144700  |
| H | -2.59850900 | 3.29544100  | 3.48736900  |
| C | 3.80413600  | -1.27619700 | -2.16563400 |
| H | 3.66502400  | -1.02639500 | -3.21464500 |
| C | -0.89791500 | 6.34526200  | 2.41244100  |

|   |             |             |             |
|---|-------------|-------------|-------------|
| H | 0.18168700  | 6.48085300  | 2.58852200  |
| C | 5.07306300  | -1.80979400 | 4.15413400  |
| H | 4.57552100  | -2.77857000 | 4.32631100  |
| C | 1.82897200  | -5.54035600 | -3.12983700 |
| H | 1.71862400  | -5.07693500 | -4.12392300 |
| C | 0.98065900  | 0.47791500  | 4.21131900  |
| N | -4.58683700 | -0.04336200 | -3.47333900 |
| C | 4.34468500  | -2.16927900 | 1.97045900  |
| H | 3.92664100  | -3.13378300 | 2.29946900  |
| C | 4.16757800  | -1.85202600 | 0.54054200  |
| C | 5.17420400  | 2.59229800  | -3.50743800 |
| H | 5.47455100  | 3.21010500  | -2.64501700 |
| C | -0.93333200 | 1.91776300  | 3.84185000  |
| C | 0.45100800  | 1.73967000  | 3.96962900  |
| H | 1.09533900  | 2.61214100  | 3.89790600  |
| C | 4.38536500  | -0.31941200 | -1.32155000 |
| C | -1.50096300 | 5.59334900  | 3.60265900  |
| H | -2.57522200 | 5.44826400  | 3.40113000  |
| C | -4.71211600 | 2.23209900  | -4.37586000 |
| H | -5.40696300 | 2.45853000  | -3.55030800 |
| N | -4.35143200 | -3.13758100 | 2.17097100  |
| C | -4.80638700 | 0.73335100  | -4.67456500 |
| H | -4.08985600 | 0.48853000  | -5.47567500 |
| N | -0.45466900 | -4.89249400 | -2.61996300 |
| C | -3.76801100 | -2.48349400 | -0.06932200 |

|   |             |             |             |
|---|-------------|-------------|-------------|
| C | -3.60011000 | -0.83983700 | -3.46577300 |
| H | -2.93088400 | -0.94563600 | -4.33395600 |
| C | -4.18954000 | -2.71493800 | 4.54661700  |
| H | -3.56060200 | -3.61440600 | 4.64884900  |
| C | -4.02094200 | -1.61264400 | -1.12143400 |
| H | -4.77919500 | -0.83795000 | -1.03845300 |
| C | -2.07320300 | -3.59305600 | -1.39700600 |
| C | -5.14456300 | -2.91259800 | 3.36592700  |
| H | -5.76022900 | -2.00272100 | 3.27175100  |
| C | -2.32362400 | -2.69964600 | -2.44653000 |
| H | -1.75273800 | -2.80353000 | -3.36589800 |
| C | -2.79379600 | -3.47974800 | -0.21552900 |
| H | -2.60895900 | -4.15188100 | 0.61869600  |
| C | -3.30001600 | -1.71865300 | -2.31890800 |
| C | 0.45834500  | -6.02237200 | -2.65182000 |
| H | 0.58475600  | -6.46160300 | -1.64845500 |
| C | -1.06737300 | -4.66394000 | -1.53316500 |
| H | -0.89784800 | -5.27229600 | -0.63064000 |
| C | -4.51334500 | -2.34309300 | 1.19575300  |
| H | -5.22433700 | -1.50307200 | 1.24096600  |
| C | -5.08597900 | 3.05107300  | -5.60905600 |
| H | -4.40057700 | 2.82625400  | -6.43172700 |
| H | -6.10805600 | 2.82464500  | -5.92757400 |
| H | -5.01751100 | 4.12027500  | -5.39235000 |
| C | -0.10276600 | -7.07275900 | -3.60874600 |

|   |             |             |             |
|---|-------------|-------------|-------------|
| H | -0.23494100 | -6.64119300 | -4.60545800 |
| H | 0.57286300  | -7.93061100 | -3.68083000 |
| H | -1.07686900 | -7.42468900 | -3.25928300 |
| C | 6.55589200  | -1.91859300 | 4.50151200  |
| H | 7.05203500  | -0.95728300 | 4.33763000  |
| H | 6.68734600  | -2.21129400 | 5.54767600  |
| H | 7.04240200  | -2.66431200 | 3.86746000  |
| C | -1.31819200 | 6.39078300  | 4.89177700  |
| H | -0.25331100 | 6.53866200  | 5.09468200  |
| H | -1.80322700 | 7.36855900  | 4.81326600  |
| H | -1.75370400 | 5.85292700  | 5.73782800  |
| C | 6.35929400  | 2.41122600  | -4.45365500 |
| H | 6.06556200  | 1.79871700  | -5.31137700 |
| H | 6.71615000  | 3.38017300  | -4.81591800 |
| H | 7.18237400  | 1.90620600  | -3.94150300 |
| H | 4.39954700  | 4.25463300  | -4.61588700 |
| H | -5.81924600 | 0.51862300  | -5.03693800 |
| H | 4.56319200  | -1.03548300 | 6.08714500  |
| H | 2.48377000  | -6.41557000 | -3.22632900 |
| H | -1.36915200 | 7.33394800  | 2.35529500  |
| H | -4.78920000 | -2.60426600 | 5.45854700  |
| C | -6.04299300 | -4.12501500 | 3.59874600  |
| H | -6.63197200 | -4.00032800 | 4.51258400  |
| H | -6.72870900 | -4.25850600 | 2.75803800  |
| H | -5.43597500 | -5.03075500 | 3.68952800  |

|   |             |             |             |
|---|-------------|-------------|-------------|
| C | 0.53778661  | -1.96668520 | 0.34154542  |
| C | -0.72085939 | -1.33900020 | 0.73890242  |
| C | -1.16507739 | -0.19397120 | 0.17026542  |
| C | -0.26504039 | 0.60571880  | -0.61590258 |
| C | 0.89818861  | 0.14129780  | -1.14744158 |
| H | 0.97178961  | -2.62265520 | 1.10548542  |
| H | -1.22000539 | -1.68915620 | 1.64451842  |
| H | -2.05536439 | 0.27631280  | 0.56923742  |
| H | -0.40465039 | 1.68237280  | -0.51452758 |
| H | 1.66924661  | 0.86570580  | -1.41214558 |
| H | 1.18601339  | -1.18944680 | 0.18838058  |
| H | 0.51679161  | -2.51046920 | -0.62848058 |
| H | 0.94738161  | -0.78377320 | -1.73500858 |

**TS**

0 1

|   |             |             |             |
|---|-------------|-------------|-------------|
| N | -3.34057800 | 2.53730000  | -4.00928600 |
| N | 4.71269400  | 1.28289400  | -3.08304400 |
| N | -1.17848200 | 5.63795700  | 1.18223200  |
| N | 4.94574600  | -1.39058700 | 2.76978600  |
| N | 2.95790700  | -0.75683500 | 4.81426900  |
| N | 2.95097700  | 3.60518600  | -3.29375900 |
| N | 2.42239800  | -4.64553000 | -2.16011300 |
| C | -1.63164800 | 4.10021600  | -1.20265000 |
| H | -2.49388800 | 4.36523000  | -0.59611000 |
| C | 4.38795200  | -0.76463600 | 5.03858600  |

|   |             |             |             |
|---|-------------|-------------|-------------|
| H | 4.85272500  | 0.21692500  | 4.84984000  |
| N | -3.41135300 | -1.50777500 | 4.37167300  |
| C | 1.79498200  | 3.16235000  | -3.56792600 |
| H | 1.59841200  | 2.55958500  | -4.46826600 |
| N | -0.81452600 | 4.32037300  | 3.73916400  |
| C | 0.61831500  | 3.45888700  | -2.72636600 |
| C | -0.18955000 | 5.21285900  | 0.51300000  |
| H | 0.84986800  | 5.38601400  | 0.83232100  |
| C | -0.35639700 | 4.47014100  | -0.75142700 |
| C | -3.13340400 | 3.04398100  | -2.86631400 |
| H | -3.95421700 | 3.25211600  | -2.16242500 |
| C | -2.14881400 | -1.62176900 | 4.34638800  |
| H | -1.64878800 | -2.59682500 | 4.46002200  |
| C | 0.76066900  | 4.14494700  | -1.51184900 |
| H | 1.75954700  | 4.42605700  | -1.18806900 |
| C | -0.64888900 | 3.09046400  | -3.16066700 |
| H | -0.78684100 | 2.55410000  | -4.09583900 |
| C | -1.78207800 | 3.41266700  | -2.40065100 |
| C | 3.59502100  | -2.79346200 | -0.30425400 |
| H | 3.27285700  | -3.76149800 | 0.07176900  |
| C | 4.80100000  | 0.99341500  | -1.85177200 |
| H | 5.20082200  | 1.70442100  | -1.11194900 |
| C | 3.40448000  | -2.50746200 | -1.66341600 |
| C | 0.12023200  | -0.62353600 | 4.31703800  |
| H | 0.55052700  | -1.60189100 | 4.51659600  |



|   |             |             |             |
|---|-------------|-------------|-------------|
| C | 2.77562100  | -3.49560900 | -2.56081000 |
| H | 2.63825800  | -3.17372700 | -3.60524400 |
| C | -1.25373300 | -0.45796000 | 4.19032300  |
| C | 4.56150300  | -0.60944300 | 0.02511100  |
| H | 5.00214900  | 0.11769100  | 0.70231900  |
| C | 2.43453000  | 0.32873800  | 4.42037200  |
| H | 3.03478100  | 1.23589600  | 4.24869400  |
| C | -1.77722900 | 0.81901900  | 3.94539500  |
| H | -2.85528600 | 0.93048900  | 3.86049500  |
| C | 4.02176600  | 3.30377100  | -4.21954600 |
| H | 3.68890700  | 2.68129900  | -5.06616000 |
| C | -1.51146600 | 3.26407800  | 3.66144700  |
| H | -2.59850900 | 3.29544100  | 3.48736900  |
| C | 3.80413600  | -1.27619700 | -2.16563400 |
| H | 3.66502400  | -1.02639500 | -3.21464500 |
| C | -0.89791500 | 6.34526200  | 2.41244100  |
| H | 0.18168700  | 6.48085300  | 2.58852200  |
| C | 5.07306300  | -1.80979400 | 4.15413400  |
| H | 4.57552100  | -2.77857000 | 4.32631100  |
| C | 1.82897200  | -5.54035600 | -3.12983700 |
| H | 1.71862400  | -5.07693500 | -4.12392300 |
| C | 0.98065900  | 0.47791500  | 4.21131900  |
| N | -4.58683700 | -0.04336200 | -3.47333900 |
| C | 4.34468500  | -2.16927900 | 1.97045900  |
| H | 3.92664100  | -3.13378300 | 2.29946900  |

|   |             |             |             |
|---|-------------|-------------|-------------|
| C | 4.16757800  | -1.85202600 | 0.54054200  |
| C | 5.17420400  | 2.59229800  | -3.50743800 |
| H | 5.47455100  | 3.21010500  | -2.64501700 |
| C | -0.93333200 | 1.91776300  | 3.84185000  |
| C | 0.45100800  | 1.73967000  | 3.96962900  |
| H | 1.09533900  | 2.61214100  | 3.89790600  |
| C | 4.38536500  | -0.31941200 | -1.32155000 |
| C | -1.50096300 | 5.59334900  | 3.60265900  |
| H | -2.57522200 | 5.44826400  | 3.40113000  |
| C | -4.71211600 | 2.23209900  | -4.37586000 |
| H | -5.40696300 | 2.45853000  | -3.55030800 |
| N | -4.35143200 | -3.13758100 | 2.17097100  |
| C | -4.80638700 | 0.73335100  | -4.67456500 |
| H | -4.08985600 | 0.48853000  | -5.47567500 |
| N | -0.45466900 | -4.89249400 | -2.61996300 |
| C | -3.76801100 | -2.48349400 | -0.06932200 |
| C | -3.60011000 | -0.83983700 | -3.46577300 |
| H | -2.93088400 | -0.94563600 | -4.33395600 |
| C | -4.18954000 | -2.71493800 | 4.54661700  |
| H | -3.56060200 | -3.61440600 | 4.64884900  |
| C | -4.02094200 | -1.61264400 | -1.12143400 |
| H | -4.77919500 | -0.83795000 | -1.03845300 |
| C | -2.07320300 | -3.59305600 | -1.39700600 |
| C | -5.14456300 | -2.91259800 | 3.36592700  |
| H | -5.76022900 | -2.00272100 | 3.27175100  |

|   |             |             |             |
|---|-------------|-------------|-------------|
| C | -2.32362400 | -2.69964600 | -2.44653000 |
| H | -1.75273800 | -2.80353000 | -3.36589800 |
| C | -2.79379600 | -3.47974800 | -0.21552900 |
| H | -2.60895900 | -4.15188100 | 0.61869600  |
| C | -3.30001600 | -1.71865300 | -2.31890800 |
| C | 0.45834500  | -6.02237200 | -2.65182000 |
| H | 0.58475600  | -6.46160300 | -1.64845500 |
| C | -1.06737300 | -4.66394000 | -1.53316500 |
| H | -0.89784800 | -5.27229600 | -0.63064000 |
| C | -4.51334500 | -2.34309300 | 1.19575300  |
| H | -5.22433700 | -1.50307200 | 1.24096600  |
| C | -5.08597900 | 3.05107300  | -5.60905600 |
| H | -4.40057700 | 2.82625400  | -6.43172700 |
| H | -6.10805600 | 2.82464500  | -5.92757400 |
| H | -5.01751100 | 4.12027500  | -5.39235000 |
| C | -0.10276600 | -7.07275900 | -3.60874600 |
| H | -0.23494100 | -6.64119300 | -4.60545800 |
| H | 0.57286300  | -7.93061100 | -3.68083000 |
| H | -1.07686900 | -7.42468900 | -3.25928300 |
| C | 6.55589200  | -1.91859300 | 4.50151200  |
| H | 7.05203500  | -0.95728300 | 4.33763000  |
| H | 6.68734600  | -2.21129400 | 5.54767600  |
| H | 7.04240200  | -2.66431200 | 3.86746000  |
| C | -1.31819200 | 6.39078300  | 4.89177700  |
| H | -0.25331100 | 6.53866200  | 5.09468200  |

|   |             |             |             |
|---|-------------|-------------|-------------|
| H | -1.80322700 | 7.36855900  | 4.81326600  |
| H | -1.75370400 | 5.85292700  | 5.73782800  |
| C | 6.35929400  | 2.41122600  | -4.45365500 |
| H | 6.06556200  | 1.79871700  | -5.31137700 |
| H | 6.71615000  | 3.38017300  | -4.81591800 |
| H | 7.18237400  | 1.90620600  | -3.94150300 |
| H | 4.39954700  | 4.25463300  | -4.61588700 |
| H | -5.81924600 | 0.51862300  | -5.03693800 |
| H | 4.56319200  | -1.03548300 | 6.08714500  |
| H | 2.48377000  | -6.41557000 | -3.22632900 |
| H | -1.36915200 | 7.33394800  | 2.35529500  |
| H | -4.78920000 | -2.60426600 | 5.45854700  |
| C | -6.04299300 | -4.12501500 | 3.59874600  |
| H | -6.63197200 | -4.00032800 | 4.51258400  |
| H | -6.72870900 | -4.25850600 | 2.75803800  |
| H | -5.43597500 | -5.03075500 | 3.68952800  |
| C | 0.53538700  | -1.95661700 | 0.35144800  |
| C | -0.66425900 | -1.31713200 | 0.73110500  |
| C | -1.12617700 | -0.13670300 | 0.15066800  |
| C | -0.26154000 | 0.64528700  | -0.61190000 |
| C | 0.95478900  | 0.15136600  | -1.13163900 |
| H | 0.98709000  | -2.61258700 | 1.09768800  |
| H | -1.13390500 | -1.60238800 | 1.67212100  |
| H | -2.02236400 | 0.32178100  | 0.56144000  |
| H | -0.41885000 | 1.72194100  | -0.58132500 |

|   |            |             |             |
|---|------------|-------------|-------------|
| H | 1.70814700 | 0.89347400  | -1.40224300 |
| H | 1.24741300 | -0.79241500 | -0.11062200 |
| H | 0.63829200 | -2.36470100 | -0.65397800 |
| H | 0.92728200 | -0.67340500 | -1.84310600 |

**Product**

0 1

|   |             |             |             |
|---|-------------|-------------|-------------|
| N | -3.34057800 | 2.53730000  | -4.00928600 |
| N | 4.71269400  | 1.28289400  | -3.08304400 |
| N | -1.17848200 | 5.63795700  | 1.18223200  |
| N | 4.94574600  | -1.39058700 | 2.76978600  |
| N | 2.95790700  | -0.75683500 | 4.81426900  |
| N | 2.95097700  | 3.60518600  | -3.29375900 |
| N | 2.42239800  | -4.64553000 | -2.16011300 |
| C | -1.63164800 | 4.10021600  | -1.20265000 |
| H | -2.49388800 | 4.36523000  | -0.59611000 |
| C | 4.38795200  | -0.76463600 | 5.03858600  |
| H | 4.85272500  | 0.21692500  | 4.84984000  |
| N | -3.41135300 | -1.50777500 | 4.37167300  |
| C | 1.79498200  | 3.16235000  | -3.56792600 |
| H | 1.59841200  | 2.55958500  | -4.46826600 |
| N | -0.81452600 | 4.32037300  | 3.73916400  |
| C | 0.61831500  | 3.45888700  | -2.72636600 |
| C | -0.18955000 | 5.21285900  | 0.51300000  |
| H | 0.84986800  | 5.38601400  | 0.83232100  |
| C | -0.35639700 | 4.47014100  | -0.75142700 |

|   |             |             |             |
|---|-------------|-------------|-------------|
| C | -3.13340400 | 3.04398100  | -2.86631400 |
| H | -3.95421700 | 3.25211600  | -2.16242500 |
| C | -2.14881400 | -1.62176900 | 4.34638800  |
| H | -1.64878800 | -2.59682500 | 4.46002200  |
| C | 0.76066900  | 4.14494700  | -1.51184900 |
| H | 1.75954700  | 4.42605700  | -1.18806900 |
| C | -0.64888900 | 3.09046400  | -3.16066700 |
| H | -0.78684100 | 2.55410000  | -4.09583900 |
| C | -1.78207800 | 3.41266700  | -2.40065100 |
| C | 3.59502100  | -2.79346200 | -0.30425400 |
| H | 3.27285700  | -3.76149800 | 0.07176900  |
| C | 4.80100000  | 0.99341500  | -1.85177200 |
| H | 5.20082200  | 1.70442100  | -1.11194900 |
| C | 3.40448000  | -2.50746200 | -1.66341600 |
| C | 0.12023200  | -0.62353600 | 4.31703800  |
| H | 0.55052700  | -1.60189100 | 4.51659600  |
| C | 2.77562100  | -3.49560900 | -2.56081000 |
| H | 2.63825800  | -3.17372700 | -3.60524400 |
| C | -1.25373300 | -0.45796000 | 4.19032300  |
| C | 4.56150300  | -0.60944300 | 0.02511100  |
| H | 5.00214900  | 0.11769100  | 0.70231900  |
| C | 2.43453000  | 0.32873800  | 4.42037200  |
| H | 3.03478100  | 1.23589600  | 4.24869400  |
| C | -1.77722900 | 0.81901900  | 3.94539500  |
| H | -2.85528600 | 0.93048900  | 3.86049500  |

|   |             |             |             |
|---|-------------|-------------|-------------|
| C | 4.02176600  | 3.30377100  | -4.21954600 |
| H | 3.68890700  | 2.68129900  | -5.06616000 |
| C | -1.51146600 | 3.26407800  | 3.66144700  |
| H | -2.59850900 | 3.29544100  | 3.48736900  |
| C | 3.80413600  | -1.27619700 | -2.16563400 |
| H | 3.66502400  | -1.02639500 | -3.21464500 |
| C | -0.89791500 | 6.34526200  | 2.41244100  |
| H | 0.18168700  | 6.48085300  | 2.58852200  |
| C | 5.07306300  | -1.80979400 | 4.15413400  |
| H | 4.57552100  | -2.77857000 | 4.32631100  |
| C | 1.82897200  | -5.54035600 | -3.12983700 |
| H | 1.71862400  | -5.07693500 | -4.12392300 |
| C | 0.98065900  | 0.47791500  | 4.21131900  |
| N | -4.58683700 | -0.04336200 | -3.47333900 |
| C | 4.34468500  | -2.16927900 | 1.97045900  |
| H | 3.92664100  | -3.13378300 | 2.29946900  |
| C | 4.16757800  | -1.85202600 | 0.54054200  |
| C | 5.17420400  | 2.59229800  | -3.50743800 |
| H | 5.47455100  | 3.21010500  | -2.64501700 |
| C | -0.93333200 | 1.91776300  | 3.84185000  |
| C | 0.45100800  | 1.73967000  | 3.96962900  |
| H | 1.09533900  | 2.61214100  | 3.89790600  |
| C | 4.38536500  | -0.31941200 | -1.32155000 |
| C | -1.50096300 | 5.59334900  | 3.60265900  |
| H | -2.57522200 | 5.44826400  | 3.40113000  |

|   |             |             |             |
|---|-------------|-------------|-------------|
| C | -4.71211600 | 2.23209900  | -4.37586000 |
| H | -5.40696300 | 2.45853000  | -3.55030800 |
| N | -4.35143200 | -3.13758100 | 2.17097100  |
| C | -4.80638700 | 0.73335100  | -4.67456500 |
| H | -4.08985600 | 0.48853000  | -5.47567500 |
| N | -0.45466900 | -4.89249400 | -2.61996300 |
| C | -3.76801100 | -2.48349400 | -0.06932200 |
| C | -3.60011000 | -0.83983700 | -3.46577300 |
| H | -2.93088400 | -0.94563600 | -4.33395600 |
| C | -4.18954000 | -2.71493800 | 4.54661700  |
| H | -3.56060200 | -3.61440600 | 4.64884900  |
| C | -4.02094200 | -1.61264400 | -1.12143400 |
| H | -4.77919500 | -0.83795000 | -1.03845300 |
| C | -2.07320300 | -3.59305600 | -1.39700600 |
| C | -5.14456300 | -2.91259800 | 3.36592700  |
| H | -5.76022900 | -2.00272100 | 3.27175100  |
| C | -2.32362400 | -2.69964600 | -2.44653000 |
| H | -1.75273800 | -2.80353000 | -3.36589800 |
| C | -2.79379600 | -3.47974800 | -0.21552900 |
| H | -2.60895900 | -4.15188100 | 0.61869600  |
| C | -3.30001600 | -1.71865300 | -2.31890800 |
| C | 0.45834500  | -6.02237200 | -2.65182000 |
| H | 0.58475600  | -6.46160300 | -1.64845500 |
| C | -1.06737300 | -4.66394000 | -1.53316500 |
| H | -0.89784800 | -5.27229600 | -0.63064000 |



|   |             |             |             |
|---|-------------|-------------|-------------|
| C | -4.51334500 | -2.34309300 | 1.19575300  |
| H | -5.22433700 | -1.50307200 | 1.24096600  |
| C | -5.08597900 | 3.05107300  | -5.60905600 |
| H | -4.40057700 | 2.82625400  | -6.43172700 |
| H | -6.10805600 | 2.82464500  | -5.92757400 |
| H | -5.01751100 | 4.12027500  | -5.39235000 |
| C | -0.10276600 | -7.07275900 | -3.60874600 |
| H | -0.23494100 | -6.64119300 | -4.60545800 |
| H | 0.57286300  | -7.93061100 | -3.68083000 |
| H | -1.07686900 | -7.42468900 | -3.25928300 |
| C | 6.55589200  | -1.91859300 | 4.50151200  |
| H | 7.05203500  | -0.95728300 | 4.33763000  |
| H | 6.68734600  | -2.21129400 | 5.54767600  |
| H | 7.04240200  | -2.66431200 | 3.86746000  |
| C | -1.31819200 | 6.39078300  | 4.89177700  |
| H | -0.25331100 | 6.53866200  | 5.09468200  |
| H | -1.80322700 | 7.36855900  | 4.81326600  |
| H | -1.75370400 | 5.85292700  | 5.73782800  |
| C | 6.35929400  | 2.41122600  | -4.45365500 |
| H | 6.06556200  | 1.79871700  | -5.31137700 |
| H | 6.71615000  | 3.38017300  | -4.81591800 |
| H | 7.18237400  | 1.90620600  | -3.94150300 |
| H | 4.39954700  | 4.25463300  | -4.61588700 |
| H | -5.81924600 | 0.51862300  | -5.03693800 |
| H | 4.56319200  | -1.03548300 | 6.08714500  |

|   |             |             |             |
|---|-------------|-------------|-------------|
| H | 2.48377000  | -6.41557000 | -3.22632900 |
| H | -1.36915200 | 7.33394800  | 2.35529500  |
| H | -4.78920000 | -2.60426600 | 5.45854700  |
| C | -6.04299300 | -4.12501500 | 3.59874600  |
| H | -6.63197200 | -4.00032800 | 4.51258400  |
| H | -6.72870900 | -4.25850600 | 2.75803800  |
| H | -5.43597500 | -5.03075500 | 3.68952800  |
| C | 0.45178113  | -1.94629653 | 0.30080316  |
| C | -0.67886487 | -1.29301153 | 0.65976016  |
| C | -1.16148287 | -0.07118253 | 0.06552316  |
| C | -0.33824587 | 0.69010747  | -0.66944484 |
| C | 0.94018313  | 0.16168647  | -1.17538384 |
| H | 0.92418413  | -2.60226653 | 1.02634316  |
| H | -1.11401087 | -1.50236753 | 1.64217616  |
| H | -2.06456987 | 0.37350147  | 0.49009516  |
| H | -0.51625587 | 1.76676147  | -0.72166984 |
| H | 1.67284113  | 0.92449447  | -1.45288784 |
| H | 1.40001887  | -0.32663547 | -0.39807716 |
| H | 0.69958613  | -2.19568053 | -0.74602284 |
| H | 0.82297613  | -0.54578453 | -2.03175084 |

## 6. 6- $\pi$ electron cyclization reaction

Without CC2 cage

Reactant

0 1

|   |             |            |             |
|---|-------------|------------|-------------|
| C | -0.71700000 | 1.14078700 | -0.19286300 |
|---|-------------|------------|-------------|

|   |             |             |             |
|---|-------------|-------------|-------------|
| C | -1.69385800 | 0.06959500  | 0.05301600  |
| C | -1.53492000 | -1.25624800 | 0.10043100  |
| C | 1.75930000  | -1.00837000 | -0.29589200 |
| C | 1.55200100  | 0.12529300  | 0.37350400  |
| C | 0.61497500  | 1.18920300  | -0.02188100 |
| H | -1.18104800 | 2.08361400  | -0.47841200 |
| H | -2.70154400 | 0.44872500  | 0.22219800  |
| H | -2.38272200 | -1.89330300 | 0.33288000  |
| H | 2.50209200  | -1.73055400 | 0.02816600  |
| H | 2.17735500  | 0.34493800  | 1.23964700  |
| H | 1.08102300  | 2.16591600  | -0.15658200 |
| H | 1.21012900  | -1.23398000 | -1.20566400 |
| H | -0.58827600 | -1.74691700 | -0.08012100 |

**TS**

0 1

|   |             |             |             |
|---|-------------|-------------|-------------|
| C | 0.69931500  | 1.23275000  | 0.16378800  |
| C | 1.47065400  | 0.12233100  | -0.19698100 |
| C | 1.13112800  | -1.19980800 | 0.06400700  |
| C | -1.13112900 | -1.19980700 | 0.06400600  |
| C | -1.47065400 | 0.12233300  | -0.19698000 |
| C | -0.69931300 | 1.23275100  | 0.16378800  |
| H | 1.17145600  | 2.21216400  | 0.11778300  |
| H | 2.30421900  | 0.32230700  | -0.87110000 |
| H | 1.61882800  | -1.98313900 | -0.51400600 |
| H | -1.61883000 | -1.98313700 | -0.51400700 |

|   |             |             |             |
|---|-------------|-------------|-------------|
| H | -2.30421900 | 0.32230900  | -0.87110000 |
| H | -1.17145400 | 2.21216500  | 0.11778400  |
| H | -0.92375800 | -1.48298700 | 1.08243900  |
| H | 0.92375700  | -1.48298700 | 1.08244000  |

**Product**

0 1

|   |             |             |             |
|---|-------------|-------------|-------------|
| C | -1.27977900 | 0.73427300  | -0.00009600 |
| C | -0.13861100 | 1.42554100  | -0.00004300 |
| C | 1.22251700  | 0.77686000  | 0.00015000  |
| C | 1.22331500  | -0.77566000 | -0.00017600 |
| C | -0.13718000 | -1.42566200 | 0.00005600  |
| C | -1.27904100 | -0.73553900 | 0.00005300  |
| H | -2.23497500 | 1.25155700  | -0.00014800 |
| H | -0.15748900 | 2.51305300  | -0.00010900 |
| H | 1.77815200  | 1.14933900  | -0.86943700 |
| H | 1.77881400  | -1.14727100 | -0.87022900 |
| H | -0.15497100 | -2.51319200 | 0.00018200  |
| H | -2.23372400 | -1.25376800 | 0.00027300  |
| H | 1.77926300  | -1.14753900 | 0.86950600  |
| H | 1.77760800  | 1.14894500  | 0.87029800  |

**With CC2 cage**

**Reactant**

0 1

|   |             |             |            |
|---|-------------|-------------|------------|
| N | 3.28731200  | 1.77674200  | 4.37528000 |
| N | -4.28974400 | -1.27047700 | 3.66989600 |

|   |             |             |             |
|---|-------------|-------------|-------------|
| N | -0.43997900 | 5.74013600  | 0.99152500  |
| N | -4.89692500 | -1.57668400 | -2.73690500 |
| N | -3.53126700 | 0.24984100  | -4.54351900 |
| N | -3.10571300 | 1.20057700  | 4.65280200  |
| N | -0.78643000 | -5.47972100 | 0.31427700  |
| C | 0.77870800  | 3.60711900  | 2.48643700  |
| H | 1.43232500  | 4.29383900  | 1.95463000  |
| C | -4.93494300 | -0.08811400 | -4.64577700 |
| H | -5.57939400 | 0.59739000  | -4.07140200 |
| N | 2.81989700  | 1.19367100  | -4.80307100 |
| C | -1.85273300 | 1.01014400  | 4.61349700  |
| H | -1.36847400 | 0.19306800  | 5.17142900  |
| N | -0.94275800 | 5.45411400  | -1.83774000 |
| C | -0.94748600 | 1.89246600  | 3.85135900  |
| C | -1.16777200 | 4.84885500  | 1.52397400  |
| H | -2.26308200 | 4.84481200  | 1.40803200  |
| C | -0.60813200 | 3.76682700  | 2.35613900  |
| C | 2.76055400  | 2.52600900  | 3.49860400  |
| H | 3.36494800  | 3.19144400  | 2.86257200  |
| C | 1.65169400  | 0.70954000  | -4.71304900 |
| H | 1.39347200  | -0.27710000 | -5.12917200 |
| C | -1.46286200 | 2.91154100  | 3.03741800  |
| H | -2.54204100 | 3.01980500  | 2.96224300  |
| C | 0.42837800  | 1.74415700  | 3.97621900  |
| H | 0.85313800  | 0.97458700  | 4.61620300  |

|   |             |             |             |
|---|-------------|-------------|-------------|
| C | 1.29993200  | 2.60969800  | 3.30011500  |
| C | -2.73375000 | -3.54303400 | -0.57183400 |
| H | -2.29271600 | -4.19304000 | -1.32329700 |
| C | -4.46711300 | -1.06106300 | 2.43204800  |
| H | -5.10617000 | -0.24289400 | 2.06432400  |
| C | -2.37925900 | -3.72983500 | 0.77001000  |
| C | -0.75930700 | 0.97435100  | -4.19047000 |
| H | -0.97271300 | 0.04101300  | -4.70555600 |
| C | -1.39317800 | -4.75405700 | 1.16013800  |
| H | -1.21088900 | -4.84897800 | 2.24241300  |
| C | 0.54118600  | 1.45359400  | -4.08494600 |
| C | -4.18174100 | -1.72145600 | 0.05757200  |
| H | -4.87995100 | -0.94409600 | -0.24245400 |
| C | -3.22189400 | 1.23620300  | -3.80999200 |
| H | -3.98278800 | 1.82353500  | -3.27256200 |
| C | 0.77958100  | 2.66649000  | -3.42328800 |
| H | 1.80189000  | 3.03026500  | -3.35858400 |
| C | -3.89802400 | 0.30180000  | 5.46355700  |
| H | -3.28870800 | -0.46625800 | 5.96741900  |
| C | -0.01027000 | 4.69183300  | -2.23407900 |
| H | 1.05102200  | 4.96710600  | -2.13193300 |
| C | -2.94437900 | -2.91921700 | 1.74593500  |
| H | -2.68755000 | -3.04424800 | 2.79477700  |
| C | -1.09822000 | 6.75352000  | 0.19670500  |
| H | -2.19368200 | 6.63255300  | 0.17535000  |

|   |             |             |             |
|---|-------------|-------------|-------------|
| C | -5.18211500 | -1.51869000 | -4.15985800 |
| H | -4.51584100 | -2.18850300 | -4.72836800 |
| C | 0.13739100  | -6.47020600 | 0.82789600  |
| H | 0.27996400  | -6.38848200 | 1.91792400  |
| C | -1.83003400 | 1.70104100  | -3.65127900 |
| N | 5.12111100  | 0.08184000  | 2.88141700  |
| C | -3.98932400 | -2.37411400 | -2.35289000 |
| H | -3.42716200 | -3.00140200 | -3.06236500 |
| C | -3.62784400 | -2.54276200 | -0.93273900 |
| C | -4.96252200 | -0.39359000 | 4.61073000  |
| H | -5.54030800 | 0.38700100  | 4.08854900  |
| C | -0.27501900 | 3.39480400  | -2.88712200 |
| C | -1.58291800 | 2.90348300  | -3.00142000 |
| H | -2.39641600 | 3.49095700  | -2.58314300 |
| C | -3.85080300 | -1.91068200 | 1.39462600  |
| C | -0.56904700 | 6.72384300  | -1.24017400 |
| H | 0.52674300  | 6.83810000  | -1.19828200 |
| C | 4.73042800  | 1.83821900  | 4.53382900  |
| H | 5.18150800  | 2.53721500  | 3.81022500  |
| N | 4.58130000  | -0.72547400 | -3.48141600 |
| C | 5.31488900  | 0.44875700  | 4.26689600  |
| H | 4.85789800  | -0.27067100 | 4.96614000  |
| N | 2.13001900  | -5.11172000 | 0.49851800  |
| C | 4.30266500  | -1.12173500 | -1.12795900 |
| C | 4.45358400  | -0.96896000 | 2.64214200  |

|   |            |             |             |
|---|------------|-------------|-------------|
| H | 4.04628000 | -1.59692500 | 3.45017700  |
| C | 3.82656300 | 0.40568600  | -5.48059600 |
| H | 3.43875000 | -0.56049900 | -5.84261000 |
| C | 4.54766700 | -0.66378400 | 0.16103700  |
| H | 5.02727000 | 0.29639600  | 0.33360100  |
| C | 3.30459400 | -3.13239300 | -0.21995600 |
| C | 5.01973100 | 0.14366400  | -4.55774400 |
| H | 5.36976400 | 1.11558200  | -4.17201700 |
| C | 3.56291000 | -2.66642200 | 1.07541800  |
| H | 3.26084000 | -3.28024800 | 1.92069100  |
| C | 3.68184900 | -2.36346500 | -1.31237600 |
| H | 3.48129000 | -2.69841600 | -2.32652700 |
| C | 4.18405800 | -1.43902300 | 1.27073600  |
| C | 1.49893800 | -6.37228700 | 0.14051300  |
| H | 1.33658700 | -6.43846400 | -0.94802100 |
| C | 2.59926500 | -4.40701000 | -0.44688300 |
| H | 2.49549200 | -4.70802300 | -1.50154800 |
| C | 4.69830400 | -0.30455900 | -2.29122200 |
| H | 5.11338700 | 0.68938100  | -2.06158800 |
| C | 5.04631100 | 2.29101200  | 5.95746900  |
| H | 4.60384000 | 1.59801300  | 6.67931700  |
| H | 6.12786900 | 2.32897400  | 6.11970600  |
| H | 4.63124200 | 3.28509200  | 6.14275700  |
| C | 2.40710100 | -7.51417900 | 0.59572200  |
| H | 2.58446800 | -7.44687400 | 1.67338700  |



|   |             |             |             |
|---|-------------|-------------|-------------|
| H | 1.95203000  | -8.48396400 | 0.37219100  |
| H | 3.37359700  | -7.45720500 | 0.08820600  |
| C | -6.63764400 | -1.91959800 | -4.38751400 |
| H | -7.30258100 | -1.25521300 | -3.82754400 |
| H | -6.89299000 | -1.86304900 | -5.45011800 |
| H | -6.80989200 | -2.94220700 | -4.04194000 |
| C | -1.17839500 | 7.85577700  | -2.06340800 |
| H | -2.26598600 | 7.74532400  | -2.10736900 |
| H | -0.93851300 | 8.82748600  | -1.62100700 |
| H | -0.79303000 | 7.83429900  | -3.08604400 |
| C | -5.89223300 | -1.23023100 | 5.48626800  |
| H | -5.32111000 | -2.00193100 | 6.01107200  |
| H | -6.39861900 | -0.60065800 | 6.22427500  |
| H | -6.64937300 | -1.72605700 | 4.87337600  |
| H | -4.40808200 | 0.89866100  | 6.22983500  |
| H | 6.39340000  | 0.48785500  | 4.46374300  |
| H | -5.22188400 | -0.03064000 | -5.70302600 |
| H | -0.28055000 | -7.46143900 | 0.60958600  |
| H | -0.86440800 | 7.73431800  | 0.62864000  |
| H | 4.18097400  | 0.98328900  | -6.34344800 |
| C | 6.14684900  | -0.54870100 | -5.32057700 |
| H | 6.48605300  | 0.07099500  | -6.15626700 |
| H | 6.99622300  | -0.73591300 | -4.65851400 |
| H | 5.80127200  | -1.51092900 | -5.71029300 |
| C | -0.04705900 | -0.89991600 | 1.25426100  |

|   |             |             |             |
|---|-------------|-------------|-------------|
| C | -0.67549100 | 0.34692000  | 0.78824600  |
| C | -0.11320100 | 1.26009300  | -0.00388300 |
| C | 0.37688700  | -1.44126000 | -1.93389800 |
| C | 0.22005600  | -2.25860200 | -0.88923800 |
| C | 0.35141200  | -1.96858300 | 0.54492600  |
| H | 0.03701100  | -0.97893400 | 2.34027200  |
| H | -1.66120700 | 0.55354100  | 1.21100400  |
| H | -0.63003400 | 2.17880700  | -0.26762200 |
| H | 0.22924000  | -1.81064700 | -2.94595300 |
| H | -0.00968500 | -3.30827200 | -1.08816400 |
| H | 0.73411100  | -2.81418500 | 1.11948200  |
| H | 0.66464700  | -0.40251800 | -1.83080300 |
| H | 0.89889700  | 1.13874600  | -0.38107000 |

**TS**

0 1

|   |             |             |             |
|---|-------------|-------------|-------------|
| N | -3.29542600 | 1.78449100  | 4.38652900  |
| N | 4.26151700  | 3.65162100  | 1.62707300  |
| N | 0.61864200  | -3.27552900 | 4.71709600  |
| N | 4.85637200  | -0.71174500 | -3.09394900 |
| N | 3.57211100  | -3.32646300 | -3.08580000 |
| N | 3.08974600  | 2.57471000  | 4.03428000  |
| N | 0.52918400  | 4.05188200  | -3.55273100 |
| C | -0.69809800 | -0.75868800 | 4.24987700  |
| H | -1.32336500 | -1.63761100 | 4.38415400  |
| C | 4.96284400  | -3.11145900 | -3.42313300 |

|   |             |             |             |
|---|-------------|-------------|-------------|
| H | 5.62820000  | -3.18231200 | -2.54718700 |
| N | -2.74350400 | -4.34045900 | -2.47496200 |
| C | 1.83286800  | 2.65486700  | 3.88459000  |
| H | 1.32355600  | 3.61902200  | 3.72797000  |
| N | 1.12704900  | -5.14065800 | 2.56052200  |
| C | 0.95712900  | 1.46817900  | 3.96141000  |
| C | 1.29880200  | -2.26183100 | 4.37428800  |
| H | 2.38809100  | -2.31481300 | 4.22159300  |
| C | 0.69197100  | -0.92805300 | 4.19993800  |
| C | -2.72157200 | 0.65728100  | 4.29884300  |
| H | -3.28526000 | -0.28673500 | 4.36154000  |
| C | -1.59301900 | -3.90471700 | -2.78060800 |
| H | -1.36398200 | -3.50460200 | -3.78080400 |
| C | 1.51068700  | 0.18304200  | 4.04810400  |
| H | 2.59261000  | 0.08172600  | 4.02003600  |
| C | -0.42325700 | 1.62542600  | 4.01195400  |
| H | -0.87739300 | 2.61226000  | 3.96261100  |
| C | -1.25917900 | 0.50913900  | 4.15994000  |
| C | 2.54725600  | 2.09103300  | -2.85626000 |
| H | 2.03783500  | 1.96502300  | -3.80860100 |
| C | 4.50268500  | 2.64762700  | 0.89121900  |
| H | 5.20899400  | 1.85795500  | 1.19232100  |
| C | 2.18757100  | 3.17008900  | -2.03779800 |
| C | 0.82785800  | -3.68742800 | -2.27686600 |
| H | 1.01771200  | -3.40963300 | -3.31068200 |

|   |             |             |             |
|---|-------------|-------------|-------------|
| C | 1.14029300  | 4.12641800  | -2.44325700 |
| H | 0.93427800  | 4.93274500  | -1.72149200 |
| C | -0.46237000 | -3.95055800 | -1.83058900 |
| C | 4.19094700  | 1.39522900  | -1.23205500 |
| H | 4.96605700  | 0.69151400  | -0.93834700 |
| C | 3.29478200  | -3.54463700 | -1.86846700 |
| H | 4.07350800  | -3.57905800 | -1.09021400 |
| C | -0.66969400 | -4.31314800 | -0.49195300 |
| H | -1.68409300 | -4.52274600 | -0.16257700 |
| C | 3.85328600  | 3.80314600  | 3.99650800  |
| H | 3.22319000  | 4.68943200  | 3.81593600  |
| C | 0.17315700  | -4.86475000 | 1.77288700  |
| H | -0.88108200 | -4.95550600 | 2.07696100  |
| C | 2.83517000  | 3.34788400  | -0.82365100 |
| H | 2.56995200  | 4.16984600  | -0.16369700 |
| C | 1.32372200  | -4.52718700 | 4.88758900  |
| H | 2.41177400  | -4.42642000 | 4.74268200  |
| C | 5.15004100  | -1.74003700 | -4.07699700 |
| H | 4.46030100  | -1.68023600 | -4.93520200 |
| C | -0.42454700 | 5.09901600  | -3.85834800 |
| H | -0.59026200 | 5.78036300  | -3.00774000 |
| C | 1.91763800  | -3.79664300 | -1.40188100 |
| N | -5.23302300 | 1.79270000  | 2.20948700  |
| C | 3.90586700  | 0.08780200  | -3.35009700 |
| H | 3.30974500  | 0.00422600  | -4.27260300 |

|   |             |             |             |
|---|-------------|-------------|-------------|
| C | 3.53984300  | 1.20430000  | -2.45921800 |
| C | 4.93122200  | 3.73583000  | 2.91057400  |
| H | 5.55076400  | 2.84347900  | 3.09974600  |
| C | 0.40497400  | -4.42879700 | 0.38165500  |
| C | 1.70189000  | -4.16568300 | -0.07989700 |
| H | 2.53067600  | -4.26393500 | 0.61653400  |
| C | 3.84332200  | 2.46316800  | -0.41544900 |
| C | 0.79118100  | -5.57474800 | 3.90457200  |
| H | -0.30063200 | -5.64117300 | 4.04247800  |
| C | -4.73301500 | 1.78586900  | 4.60356500  |
| H | -5.13222200 | 0.75836200  | 4.62673400  |
| N | -4.63025600 | -2.13814700 | -2.87136300 |
| C | -5.41219300 | 2.52227600  | 3.44610500  |
| H | -5.01611000 | 3.54979900  | 3.39462700  |
| N | -2.40763400 | 3.86511200  | -3.17737100 |
| C | -4.43450900 | -0.17289800 | -1.50416500 |
| C | -4.65703600 | 2.39776400  | 1.25617300  |
| H | -4.31701900 | 3.44111800  | 1.35098200  |
| C | -3.77083800 | -4.31041100 | -3.49373300 |
| H | -3.42076800 | -3.86412100 | -4.43878300 |
| C | -4.69519500 | 0.41092000  | -0.27056300 |
| H | -5.13160700 | -0.16482600 | 0.54168500  |
| C | -3.54757800 | 1.93016400  | -2.31080200 |
| C | -4.99747400 | -3.53564500 | -3.00573600 |
| H | -5.30687500 | -3.96493100 | -2.03832200 |

|   |             |             |             |
|---|-------------|-------------|-------------|
| C | -3.83337200 | 2.51567400  | -1.07105500 |
| H | -3.58123000 | 3.56246900  | -0.91909100 |
| C | -3.85695500 | 0.59455900  | -2.52482600 |
| H | -3.63634200 | 0.11425200  | -3.47447600 |
| C | -4.39752600 | 1.76315500  | -0.04945600 |
| C | -1.77053900 | 4.52814900  | -4.30368800 |
| H | -1.58530000 | 3.81997600  | -5.12825100 |
| C | -2.85680800 | 2.69354400  | -3.36614200 |
| H | -2.73495600 | 2.17204900  | -4.32884800 |
| C | -4.76152000 | -1.59367100 | -1.73401600 |
| H | -5.13726700 | -2.14860800 | -0.86017600 |
| C | -5.02520500 | 2.48418300  | 5.92973400  |
| H | -4.63277700 | 3.50534700  | 5.91152400  |
| H | -6.10263100 | 2.52198200  | 6.11759600  |
| H | -4.54626500 | 1.95112100  | 6.75509900  |
| C | -2.68924000 | 5.65068200  | -4.78561100 |
| H | -2.88399200 | 6.35368800  | -3.96995200 |
| H | -2.23307200 | 6.19368200  | -5.61897600 |
| H | -3.64720300 | 5.24235800  | -5.11809200 |
| C | 6.58921600  | -1.56522500 | -4.55589900 |
| H | 7.27817100  | -1.63086800 | -3.70847000 |
| H | 6.85069300  | -2.33745300 | -5.28586100 |
| H | 6.71885400  | -0.58583000 | -5.02354400 |
| C | 1.43310900  | -6.93500500 | 4.16240200  |
| H | 2.51782500  | -6.86900600 | 4.03568800  |

|   |             |             |             |
|---|-------------|-------------|-------------|
| H | 1.21518000  | -7.27855100 | 5.17819300  |
| H | 1.05314900  | -7.67677500 | 3.45520000  |
| C | 5.80199500  | 4.98941700  | 2.93823500  |
| H | 5.19031400  | 5.87603400  | 2.74630500  |
| H | 6.29045500  | 5.09988300  | 3.91122200  |
| H | 6.57341900  | 4.93513700  | 2.16569900  |
| H | 4.35016100  | 3.92214700  | 4.96747000  |
| H | -6.48688300 | 2.57492400  | 3.66031700  |
| H | 5.25927500  | -3.87964100 | -4.14800600 |
| H | -0.01534500 | 5.68484600  | -4.69172300 |
| H | 1.13977400  | -4.88724300 | 5.90715600  |
| H | -4.07597400 | -5.34580200 | -3.69076200 |
| C | -6.13951200 | -3.64865100 | -4.01314700 |
| H | -6.42723700 | -4.69470800 | -4.15601200 |
| H | -7.01260900 | -3.09190400 | -3.66316800 |
| H | -5.83368500 | -3.23035800 | -4.97681900 |
| C | 0.05067500  | 1.44600200  | 0.31576300  |
| C | 1.12455300  | 0.55241600  | 0.43349600  |
| C | 1.30532800  | -0.63726800 | -0.26530300 |
| C | 0.00971000  | -0.32881000 | -2.09914600 |
| C | -0.35112600 | 1.01057100  | -2.06990300 |
| C | -0.61567200 | 1.70315400  | -0.88539400 |
| H | -0.02831600 | 2.21927900  | 1.07895000  |
| H | 1.97525100  | 0.94617200  | 0.99517700  |
| H | 2.32792400  | -1.00228500 | -0.38069700 |

|   |             |             |             |
|---|-------------|-------------|-------------|
| H | 0.45471600  | -0.74447600 | -3.00320500 |
| H | -0.27289000 | 1.61644400  | -2.97487600 |
| H | -1.11376800 | 2.66920800  | -0.96534300 |
| H | -0.60595500 | -1.02714500 | -1.55222100 |
| H | 0.58125200  | -1.43331800 | -0.18688800 |

**Product**

0 1

|   |             |             |             |
|---|-------------|-------------|-------------|
| N | 3.61381200  | 2.21476800  | 3.88041600  |
| N | -3.31729400 | -2.12055900 | 4.19121200  |
| N | -1.27072900 | 5.58311000  | 1.38709900  |
| N | -4.92010200 | -2.37466900 | -2.02398300 |
| N | -4.28145200 | -0.25253700 | -3.88921700 |
| N | -2.44417600 | 0.50596200  | 5.12575800  |
| N | 0.27293400  | -5.54942100 | 0.11532800  |
| C | 0.54904900  | 3.68654200  | 2.57465700  |
| H | 0.97670400  | 4.50993400  | 2.00819400  |
| C | -5.58903900 | -0.86416000 | -3.79160700 |
| H | -6.24960600 | -0.34322300 | -3.07932700 |
| N | 1.65865900  | 1.82580500  | -5.08185800 |
| C | -1.20356800 | 0.54230800  | 4.86783600  |
| H | -0.49894000 | -0.19750300 | 5.27832000  |
| N | -2.23387000 | 5.29050000  | -1.33769400 |
| C | -0.60531500 | 1.60670700  | 4.03774500  |
| C | -1.72285500 | 4.55044800  | 1.96707000  |
| H | -2.80192200 | 4.33702200  | 2.01923400  |



|   |             |             |             |
|---|-------------|-------------|-------------|
| C | -0.84707900 | 3.56982100  | 2.63766900  |
| C | 2.82924700  | 2.93639600  | 3.19403500  |
| H | 3.19902500  | 3.74926800  | 2.54980100  |
| C | 0.62013200  | 1.14325600  | -4.83209300 |
| H | 0.46513300  | 0.13750300  | -5.25329300 |
| C | -1.41568200 | 2.53128100  | 3.36541700  |
| H | -2.49488100 | 2.42519100  | 3.43937300  |
| C | 0.77680400  | 1.72742900  | 3.96411900  |
| H | 1.42795400  | 1.02891400  | 4.48375300  |
| C | 1.36225900  | 2.77138400  | 3.23365300  |
| C | -2.10370600 | -3.96885000 | -0.35910900 |
| H | -1.68302400 | -4.50816800 | -1.20455800 |
| C | -3.71862000 | -1.90575700 | 3.00812600  |
| H | -4.53415300 | -1.19944900 | 2.78749100  |
| C | -1.50584100 | -4.12103100 | 0.89964800  |
| C | -1.68687100 | 0.97533200  | -3.94265400 |
| H | -1.81729500 | 0.03326900  | -4.46934400 |
| C | -0.30798300 | -4.96237000 | 1.07847000  |
| H | 0.05610300  | -5.04978800 | 2.11456600  |
| C | -0.48301000 | 1.66676800  | -4.00111400 |
| C | -3.71937700 | -2.44940300 | 0.58961800  |
| H | -4.58318800 | -1.80529600 | 0.44553700  |
| C | -4.05938800 | 0.77452300  | -3.18012100 |
| H | -4.82569200 | 1.20177700  | -2.51469100 |
| C | -0.35219800 | 2.88310200  | -3.31676200 |

|   |             |             |             |
|---|-------------|-------------|-------------|
| H | 0.59410100  | 3.41427700  | -3.37884600 |
| C | -2.91983500 | -0.55320800 | 5.98924600  |
| H | -2.10953100 | -1.21296800 | 6.34007900  |
| C | -1.26868200 | 4.70777600  | -1.91728300 |
| H | -0.26291800 | 5.15342400  | -1.96439600 |
| C | -2.03124700 | -3.44697600 | 1.99272200  |
| H | -1.58716700 | -3.54909000 | 2.97945500  |
| C | -2.23057700 | 6.47572300  | 0.77378500  |
| H | -3.27257100 | 6.15319300  | 0.93250200  |
| C | -5.46402500 | -2.33044600 | -3.36947400 |
| H | -4.79511900 | -2.83329500 | -4.08749100 |
| C | 1.41695400  | -6.37823100 | 0.43803400  |
| H | 1.71483200  | -6.29171600 | 1.49591900  |
| C | -2.76927800 | 1.49093200  | -3.21586700 |
| N | 5.42617000  | 0.89793200  | 2.02337700  |
| C | -3.83452100 | -3.00531300 | -1.84704000 |
| H | -3.30889600 | -3.50502000 | -2.67613500 |
| C | -3.20508400 | -3.13841800 | -0.51908200 |
| C | -3.97103700 | -1.40362000 | 5.27096000  |
| H | -4.75076400 | -0.72472000 | 4.88763000  |
| C | -1.41947600 | 3.40487100  | -2.59497800 |
| C | -2.63158800 | 2.70128300  | -2.54649800 |
| H | -3.45727800 | 3.12656500  | -1.98169800 |
| C | -3.14239300 | -2.60519400 | 1.84324900  |
| C | -1.97238700 | 6.58484900  | -0.73216100 |

|   |             |             |             |
|---|-------------|-------------|-------------|
| H | -0.92107900 | 6.88593900  | -0.87242100 |
| C | 5.03419500  | 2.51527300  | 3.81552300  |
| H | 5.24010600  | 3.30675000  | 3.07612800  |
| N | 3.92959300  | 0.19172800  | -4.19331700 |
| C | 5.78693100  | 1.25710500  | 3.37728500  |
| H | 5.58495500  | 0.44935700  | 4.09990900  |
| N | 3.09537000  | -4.70903000 | -0.13202800 |
| C | 4.16575300  | -0.33543300 | -1.85941400 |
| C | 4.96316200  | -0.26616900 | 1.82976300  |
| H | 4.84539900  | -0.99048800 | 2.65146700  |
| C | 2.65135600  | 1.24336300  | -5.95919400 |
| H | 2.37320300  | 0.23512000  | -6.30702900 |
| C | 4.54879100  | 0.12355000  | -0.60650700 |
| H | 4.84830200  | 1.15734200  | -0.45531200 |
| C | 3.76782800  | -2.53585100 | -0.93013200 |
| C | 4.01319000  | 1.16734400  | -5.26507100 |
| H | 4.25151600  | 2.17129700  | -4.87637400 |
| C | 4.17151000  | -2.06777900 | 0.32746200  |
| H | 4.15444300  | -2.75600600 | 1.16930900  |
| C | 3.77619400  | -1.67333200 | -2.01690200 |
| H | 3.46427700  | -2.01080500 | -3.00212600 |
| C | 4.55784300  | -0.74471900 | 0.49469700  |
| C | 2.62093700  | -6.04766500 | -0.44423100 |
| H | 2.30101200  | -6.11921200 | -1.49698800 |
| C | 3.26638300  | -3.91131900 | -1.10360400 |

|   |             |             |             |
|---|-------------|-------------|-------------|
| H | 3.02847400  | -4.20074400 | -2.13978300 |
| C | 4.18275600  | 0.58312500  | -3.01420200 |
| H | 4.44686700  | 1.62847800  | -2.79039600 |
| C | 5.50034200  | 2.96538700  | 5.19856400  |
| H | 5.29445100  | 2.18502600  | 5.93729400  |
| H | 6.57440100  | 3.17496400  | 5.19478600  |
| H | 4.96991100  | 3.87101700  | 5.50410300  |
| C | 3.75639900  | -7.03675500 | -0.18315700 |
| H | 4.08607600  | -6.96459400 | 0.85776000  |
| H | 3.43013000  | -8.06251300 | -0.38040800 |
| H | 4.61148000  | -6.81313300 | -0.82641200 |
| C | -6.83172200 | -3.00906800 | -3.37176300 |
| H | -7.49829000 | -2.51416300 | -2.65915300 |
| H | -7.28303300 | -2.96607900 | -4.36775800 |
| H | -6.73767100 | -4.05747900 | -3.07713100 |
| C | -2.89836000 | 7.62113400  | -1.36374900 |
| H | -3.94294700 | 7.32862300  | -1.22121700 |
| H | -2.74130800 | 8.60561100  | -0.91257200 |
| H | -2.71032400 | 7.69651100  | -2.43784600 |
| C | -4.59015400 | -2.41725800 | 6.23026700  |
| H | -3.81742300 | -3.08692900 | 6.61956700  |
| H | -5.07478100 | -1.90936200 | 7.06966900  |
| H | -5.33686600 | -3.02510400 | 5.71285100  |
| H | -3.39306300 | -0.08874100 | 6.86326700  |
| H | 6.86127500  | 1.47920500  | 3.39683600  |

|   |             |             |             |
|---|-------------|-------------|-------------|
| H | -6.05446300 | -0.83196900 | -4.78458000 |
| H | 1.13612500  | -7.42184400 | 0.24539000  |
| H | -2.10301600 | 7.47117100  | 1.21637700  |
| H | 2.74909500  | 1.89785900  | -6.83433800 |
| C | 5.09295500  | 0.72187400  | -6.24882300 |
| H | 5.17073200  | 1.42612400  | -7.08273300 |
| H | 6.06343500  | 0.66496700  | -5.74913200 |
| H | 4.85557000  | -0.27047600 | -6.64390700 |
| C | 0.99395000  | -0.51714900 | 1.11637700  |
| C | 0.19712600  | 0.43478100  | 0.61478500  |
| C | -0.72283600 | 0.12622000  | -0.54069900 |
| C | -0.12775700 | -0.93678200 | -1.46863500 |
| C | 0.46280100  | -2.07783700 | -0.68058600 |
| C | 0.99555800  | -1.86189200 | 0.52763400  |
| H | 1.63913700  | -0.31015400 | 1.96819200  |
| H | 0.16405100  | 1.42513100  | 1.06193900  |
| H | -1.68156500 | -0.24281600 | -0.13821700 |
| H | -0.89721900 | -1.29540700 | -2.16299000 |
| H | 0.50168300  | -3.07316500 | -1.12188200 |
| H | 1.47005900  | -2.68101500 | 1.06665600  |
| H | 0.66839600  | -0.48547300 | -2.08660600 |
| H | -0.94833000 | 1.03457000  | -1.10734500 |

## 7. Claisen rearrangement reaction

Without CC2 cage

Reactant

0 1

|   |             |             |             |
|---|-------------|-------------|-------------|
| C | -0.70143800 | 1.08982600  | 0.20880800  |
| C | 0.79668400  | 1.00288000  | -0.11561800 |
| C | -2.13880900 | -0.96466900 | 0.15589100  |
| C | -1.47454000 | -0.00186600 | -0.47623400 |
| C | 1.39251000  | -0.29836900 | 0.37139300  |
| H | -2.66334200 | -1.74670800 | -0.38337500 |
| H | -1.44347000 | 0.00200500  | -1.56621000 |
| H | 1.03739500  | -0.62993000 | 1.37258500  |
| O | 2.20111300  | -0.94858200 | -0.23971300 |
| H | -2.18384500 | -1.00209800 | 1.24209600  |
| H | -0.84969300 | 1.01840000  | 1.29361200  |
| H | 0.98953800  | 1.08600600  | -1.18952700 |
| H | 1.33308500  | 1.82137500  | 0.38373400  |
| H | -1.07501400 | 2.07279700  | -0.10064300 |

**TS**

0 1

|   |             |             |             |
|---|-------------|-------------|-------------|
| C | -0.41271600 | 1.45523300  | 0.32284100  |
| C | 1.47479000  | 0.62337800  | -0.29124600 |
| C | -1.33587600 | -0.74467700 | 0.18759600  |
| C | -1.29085500 | 0.57417300  | -0.28744900 |
| C | 1.19415100  | -0.61894300 | 0.24849900  |
| H | -1.93935500 | -1.48369000 | -0.32827900 |
| H | -1.59651100 | 0.76343100  | -1.31289600 |
| H | 1.55189300  | -0.84241000 | 1.26537900  |

|   |             |             |             |
|---|-------------|-------------|-------------|
| O | 0.30276400  | -1.39034400 | -0.26207100 |
| H | -1.24828900 | -0.91505400 | 1.25778100  |
| H | -0.22120800 | 1.36913100  | 1.38890600  |
| H | 1.27154200  | 0.79849700  | -1.34128900 |
| H | 2.23889800  | 1.24605800  | 0.16693100  |
| H | -0.25604000 | 2.45180900  | -0.08141000 |

**Product**

0 1

|   |             |             |             |
|---|-------------|-------------|-------------|
| C | -2.37835900 | 0.83216600  | 0.08997200  |
| C | 2.56948400  | 0.60519300  | -0.12288700 |
| C | -0.64421200 | -0.95292500 | 0.28844100  |
| C | -1.53578600 | -0.02197800 | -0.48151600 |
| C | 1.31981400  | 0.32761400  | 0.23027800  |
| H | -0.90911800 | -1.99583100 | 0.09176200  |
| H | -1.45352000 | -0.08211700 | -1.56558800 |
| H | 0.70851300  | 1.01424500  | 0.81609700  |
| O | 0.71500300  | -0.84254400 | -0.10996400 |
| H | -0.74416300 | -0.77228500 | 1.36848200  |
| H | -2.46008600 | 0.90688700  | 1.17228900  |
| H | 3.15197400  | -0.09224300 | -0.71375100 |
| H | 3.02199900  | 1.54004500  | 0.18049400  |
| H | -3.02126900 | 1.48124000  | -0.49580300 |

**With CC2 cage**

**Reactant**

0 1

|   |             |             |             |
|---|-------------|-------------|-------------|
| N | 2.51215900  | -4.86041800 | 1.95806000  |
| N | -4.18048200 | -3.02648600 | -2.18796000 |
| N | -1.42208500 | -1.04515000 | 5.32244600  |
| N | -3.91027400 | 3.43148400  | -2.27786500 |
| N | -2.69892100 | 5.13513000  | -0.26801700 |
| N | -3.68805800 | -4.34135600 | 0.33276600  |
| N | 0.28542200  | -0.06271200 | -5.65027300 |
| C | -0.05164000 | -2.75391700 | 3.45840700  |
| H | 0.53589400  | -2.29580800 | 4.25032800  |
| C | -4.00087600 | 5.38956600  | -0.84682900 |
| H | -4.81819200 | 4.92111300  | -0.27495600 |
| N | 3.38665700  | 4.50137900  | 1.75917800  |
| C | -2.43367000 | -4.51418000 | 0.38560500  |
| H | -1.89323100 | -5.12532400 | -0.35436900 |
| N | -1.42825000 | 1.86791400  | 5.08566600  |
| C | -1.61090100 | -3.91086300 | 1.45245000  |
| C | -2.03964400 | -1.48677700 | 4.30652900  |
| H | -3.08345600 | -1.21197900 | 4.08615700  |
| C | -1.41156800 | -2.42435600 | 3.35515400  |
| C | 1.94912300  | -4.00408600 | 2.70504700  |
| H | 2.49385600  | -3.48532200 | 3.50941800  |
| C | 2.31631800  | 4.61396800  | 1.08979200  |
| H | 2.29169900  | 5.10193700  | 0.10305300  |
| C | -2.18537100 | -3.01041900 | 2.36197300  |
| H | -3.24276300 | -2.77765600 | 2.26193900  |



|   |             |             |             |
|---|-------------|-------------|-------------|
| C | -0.26410700 | -4.22666100 | 1.55866500  |
| H | 0.20569000  | -4.92122800 | 0.86662100  |
| C | 0.52229100  | -3.65344200 | 2.56968200  |
| C | -1.64770200 | 1.02933300  | -3.81283000 |
| H | -0.98449100 | 1.72767600  | -4.31689100 |
| C | -4.29677800 | -1.77977700 | -1.98628600 |
| H | -5.08838900 | -1.35683800 | -1.35386000 |
| C | -1.43980100 | -0.34449800 | -3.99803700 |
| C | -0.15532300 | 4.45711600  | 0.93390000  |
| H | -0.13531000 | 5.04453100  | 0.01935300  |
| C | -0.38013900 | -0.83784000 | -4.89991200 |
| H | -0.23034200 | -1.92886700 | -4.90786000 |
| C | 1.01921700  | 4.12796600  | 1.60110500  |
| C | -3.55272400 | 0.55744100  | -2.40520700 |
| H | -4.37563100 | 0.92595400  | -1.79662500 |
| C | -2.65820500 | 4.39673600  | 0.76131800  |
| H | -3.57079100 | 3.97694100  | 1.21368000  |
| C | 0.95849200  | 3.36495900  | 2.77645600  |
| H | 1.88826200  | 3.11787800  | 3.28237600  |
| C | -4.41120800 | -4.96070900 | -0.75498100 |
| H | -3.75415400 | -5.52933000 | -1.43379600 |
| C | -0.32587600 | 2.18848400  | 4.54808400  |
| H | 0.64385900  | 1.93529100  | 5.00403000  |
| C | -2.28722200 | -1.25364300 | -3.37660200 |
| H | -2.15778300 | -2.32441000 | -3.51246900 |

|   |             |             |             |
|---|-------------|-------------|-------------|
| C | -2.13876200 | -0.15547700 | 6.20994100  |
| H | -3.16612400 | 0.05109400  | 5.86885600  |
| C | -4.04872400 | 4.87844600  | -2.28919900 |
| H | -3.22033200 | 5.35253000  | -2.84114400 |
| C | 1.27150100  | -0.66309500 | -6.52281400 |
| H | 1.28961500  | -1.76277300 | -6.45019800 |
| C | -1.39668600 | 4.04927800  | 1.44309700  |
| N | 4.67669600  | -3.44575800 | 0.63655400  |
| C | -2.91774300 | 2.93769400  | -2.89294500 |
| H | -2.17539100 | 3.57293200  | -3.40110900 |
| C | -2.69572300 | 1.48370500  | -3.02028800 |
| C | -5.16111300 | -3.89895000 | -1.56366000 |
| H | -5.80744100 | -3.33794800 | -0.87016600 |
| C | -0.26673400 | 2.95517000  | 3.28721300  |
| C | -1.44561500 | 3.30905600  | 2.61723300  |
| H | -2.39678600 | 2.99018900  | 3.03661500  |
| C | -3.35876600 | -0.80762200 | -2.58987400 |
| C | -1.38959400 | 1.17022000  | 6.35874300  |
| H | -0.35332900 | 0.94272900  | 6.65859800  |
| C | 3.91160700  | -5.15779800 | 2.20750600  |
| H | 4.31725100  | -4.52392700 | 3.01327900  |
| N | 5.12774600  | 2.93510300  | 0.06594000  |
| C | 4.70421300  | -4.86181900 | 0.93173300  |
| H | 4.29746100  | -5.47507500 | 0.11105000  |
| N | 3.03035100  | -0.57418900 | -4.86768200 |

|   |            |             |             |
|---|------------|-------------|-------------|
| C | 4.48807100 | 0.67481200  | -0.44631500 |
| C | 4.18154100 | -3.08913200 | -0.47485100 |
| H | 3.78990300 | -3.82020500 | -1.19982900 |
| C | 4.60347000 | 5.01951500  | 1.17327000  |
| H | 4.43697600 | 5.48360800  | 0.18746000  |
| C | 4.51176500 | -0.64889400 | -0.02627800 |
| H | 4.85002400 | -0.91432100 | 0.97205700  |
| C | 3.65866000 | -0.02886900 | -2.61059100 |
| C | 5.63688300 | 3.89922900  | 1.02471900  |
| H | 5.78162900 | 3.43920900  | 2.01627200  |
| C | 3.69070800 | -1.36212800 | -2.17915600 |
| H | 3.38737000 | -2.14079200 | -2.87458800 |
| C | 4.05316800 | 0.98112300  | -1.74310000 |
| H | 4.04905700 | 2.02180800  | -2.05674300 |
| C | 4.11813000 | -1.67603600 | -0.89529400 |
| C | 2.66838800 | -0.12539500 | -6.20027500 |
| H | 2.62790400 | 0.97511500  | -6.25449500 |
| C | 3.25385400 | 0.31102200  | -3.98823400 |
| H | 3.18065800 | 1.38668800  | -4.21218500 |
| C | 4.96502600 | 1.74023900  | 0.45722300  |
| H | 5.19587700 | 1.42694100  | 1.48736700  |
| C | 4.04021000 | -6.63011700 | 2.59133800  |
| H | 3.63932900 | -7.26301500 | 1.79397500  |
| H | 5.08834900 | -6.89495000 | 2.76076700  |
| H | 3.47669800 | -6.83674300 | 3.50485300  |

|   |             |             |             |
|---|-------------|-------------|-------------|
| C | 3.69444100  | -0.65754900 | -7.19740300 |
| H | 3.73404100  | -1.74986000 | -7.14939100 |
| H | 3.43451200  | -0.35683400 | -8.21693200 |
| H | 4.68972300  | -0.27100100 | -6.96348500 |
| C | -5.38044600 | 5.23820800  | -2.94339100 |
| H | -6.20568200 | 4.77096400  | -2.39795900 |
| H | -5.52752000 | 6.32256600  | -2.94855100 |
| H | -5.40797800 | 4.87818800  | -3.97504700 |
| C | -2.05512800 | 2.04971900  | 7.41515500  |
| H | -3.08529000 | 2.27429900  | 7.12306400  |
| H | -2.06423900 | 1.54530200  | 8.38611300  |
| H | -1.51710700 | 2.99555400  | 7.51900000  |
| C | -6.00550900 | -4.55253900 | -2.65536900 |
| H | -5.36289500 | -5.09879300 | -3.35256000 |
| H | -6.72807700 | -5.24960000 | -2.21994400 |
| H | -6.55222200 | -3.79307700 | -3.22052300 |
| H | -5.14883900 | -5.64971500 | -0.32527800 |
| H | 5.74793600  | -5.15421100 | 1.10026800  |
| H | -4.16315400 | 6.47416600  | -0.86263100 |
| H | 1.02557000  | -0.38629000 | -7.55524600 |
| H | -2.18917900 | -0.63201200 | 7.19691200  |
| H | 5.01325700  | 5.77818100  | 1.85122200  |
| C | 6.96316700  | 4.45381300  | 0.51087900  |
| H | 7.35979700  | 5.20675400  | 1.19878600  |
| H | 7.69882100  | 3.65157200  | 0.41102300  |

|   |             |             |             |
|---|-------------|-------------|-------------|
| H | 6.82340300  | 4.91134900  | -0.47305800 |
| C | -0.71205900 | 0.60239500  | 0.12890200  |
| C | -2.04898900 | 0.58932300  | 0.87612000  |
| C | 0.68460600  | -1.45452600 | -0.21987300 |
| C | 0.20141700  | -0.50400400 | 0.57648000  |
| C | -2.90093100 | -0.61864000 | 0.56526600  |
| H | 1.34705200  | -2.23121500 | 0.15298500  |
| H | 0.46503300  | -0.50676500 | 1.63603900  |
| H | -2.39714500 | -1.45801000 | 0.04081400  |
| O | -4.07209500 | -0.69116400 | 0.86321800  |
| H | 0.43734800  | -1.47898500 | -1.28032500 |
| H | -0.88925800 | 0.52157400  | -0.95195900 |
| H | -1.87854600 | 0.60179700  | 1.96395600  |
| H | -2.64818900 | 1.47884200  | 0.64616700  |
| H | -0.23049900 | 1.57366400  | 0.30593900  |

**TS**

0 1

|   |             |             |             |
|---|-------------|-------------|-------------|
| N | 4.06942500  | 1.32372600  | 3.98547400  |
| N | -4.02995200 | 0.31265600  | 3.97782700  |
| N | 1.21564200  | 5.63484000  | 0.13964500  |
| N | -5.29686300 | -0.75669800 | -2.22543900 |
| N | -3.63609600 | 0.41301400  | -4.32991300 |
| N | -2.23279700 | 2.54589700  | 4.58657100  |
| N | -2.19752300 | -5.20458500 | 1.24377100  |
| C | 1.99411800  | 3.55533500  | 1.99083000  |

|   |             |             |             |
|---|-------------|-------------|-------------|
| H | 2.75216600  | 3.92823000  | 1.30675000  |
| C | -5.08420500 | 0.44571600  | -4.31674900 |
| H | -5.48203600 | 1.34688700  | -3.82216400 |
| N | 2.71068300  | -0.32566800 | -5.15503500 |
| C | -1.03932900 | 2.11664800  | 4.61772200  |
| H | -0.72070500 | 1.33567700  | 5.32643800  |
| N | 0.41419200  | 5.11131500  | -2.63216400 |
| C | 0.00956300  | 2.62976900  | 3.71818800  |
| C | 0.34686100  | 5.07823800  | 0.87741300  |
| H | -0.72038600 | 5.34535200  | 0.82006900  |
| C | 0.69043900  | 4.05732700  | 1.88400200  |
| C | 3.69284100  | 2.11400900  | 3.06728200  |
| H | 4.39394000  | 2.49749500  | 2.30915400  |
| C | 1.45918900  | -0.44602200 | -4.99377800 |
| H | 0.92065400  | -1.36822100 | -5.26172700 |
| C | -0.29326100 | 3.59326100  | 2.74635300  |
| H | -1.31518300 | 3.95742000  | 2.67679500  |
| C | 1.30524900  | 2.14178400  | 3.81852000  |
| H | 1.56619500  | 1.39357000  | 4.56269800  |
| C | 2.30660900  | 2.60503100  | 2.95437800  |
| C | -3.62488200 | -2.96497800 | 0.13872100  |
| H | -3.43410600 | -3.81628000 | -0.50971600 |
| C | -4.33406600 | 0.34205400  | 2.74765400  |
| H | -4.84260700 | 1.20588000  | 2.29094100  |
| C | -3.12837700 | -2.99692000 | 1.45020500  |

|   |             |             |             |
|---|-------------|-------------|-------------|
| C | -0.75341600 | 0.51286500  | -4.41175200 |
| H | -1.23830200 | -0.39155800 | -4.77095600 |
| C | -2.37747400 | -4.16656700 | 1.94810600  |
| H | -1.99236500 | -4.08370400 | 2.97635100  |
| C | 0.62917400  | 0.64809400  | -4.45138800 |
| C | -4.53254100 | -0.76466900 | 0.53585200  |
| H | -5.07541900 | 0.09688500  | 0.15480500  |
| C | -3.02515100 | 1.43278500  | -3.88714100 |
| H | -3.56370000 | 2.30282600  | -3.47923300 |
| C | 1.22366000  | 1.82531300  | -3.97428500 |
| H | 2.30665300  | 1.91042100  | -4.00984900 |
| C | -3.17487600 | 1.97845500  | 5.52546200  |
| H | -2.73951300 | 1.16430100  | 6.12829300  |
| C | 1.08389400  | 4.09805700  | -2.99380400 |
| H | 2.18472900  | 4.09295500  | -2.98954100 |
| C | -3.34383200 | -1.91170200 | 2.29166900  |
| H | -2.97117600 | -1.91230500 | 3.31294300  |
| C | 0.75361900  | 6.64690100  | -0.78544500 |
| H | -0.33815800 | 6.79545500  | -0.74425500 |
| C | -5.66479600 | -0.79157700 | -3.63004300 |
| H | -5.25305600 | -1.68480900 | -4.12798400 |
| C | -1.45245200 | -6.29441700 | 1.83614000  |
| H | -1.15841600 | -6.09215200 | 2.87893600  |
| C | -1.55325300 | 1.54996000  | -3.90964400 |
| N | 5.15145200  | -1.02181900 | 2.61093900  |

|   |             |             |             |
|---|-------------|-------------|-------------|
| C | -4.73116700 | -1.78139200 | -1.73821100 |
| H | -4.50414400 | -2.66958100 | -2.34831500 |
| C | -4.30960400 | -1.84868300 | -0.32542500 |
| C | -4.41222000 | 1.45039500  | 4.79774500  |
| H | -4.81643000 | 2.26842500  | 4.17916300  |
| C | 0.44112300  | 2.85708600  | -3.47166000 |
| C | -0.95361500 | 2.71566700  | -3.44769200 |
| H | -1.55119500 | 3.53678800  | -3.05879000 |
| C | -4.05996200 | -0.79304300 | 1.84194000  |
| C | 1.14947100  | 6.29537500  | -2.22145500 |
| H | 2.23692600  | 6.11477700  | -2.23745600 |
| C | 5.47350000  | 0.95370200  | 4.02125100  |
| H | 6.02477700  | 1.39195300  | 3.17264500  |
| N | 3.88031100  | -2.43303300 | -3.52773200 |
| C | 5.58620900  | -0.56992800 | 3.91503500  |
| H | 5.01109500  | -1.02720600 | 4.73669800  |
| N | 0.73627000  | -5.48446300 | 1.15624900  |
| C | 3.64831100  | -2.39237400 | -1.13368600 |
| C | 4.18681700  | -1.84251800 | 2.56529400  |
| H | 3.69295400  | -2.21525400 | 3.47608900  |
| C | 3.42914600  | -1.45754000 | -5.69864500 |
| H | 2.76962900  | -2.31171800 | -5.92317800 |
| C | 4.15583100  | -1.90197000 | 0.06355300  |
| H | 4.94178600  | -1.15098900 | 0.07460600  |
| C | 2.14712400  | -3.84128700 | 0.09977600  |



|   |             |             |             |
|---|-------------|-------------|-------------|
| C | 4.51866900  | -1.91714900 | -4.72610300 |
| H | 5.15745900  | -1.04834400 | -4.49653700 |
| C | 2.66282700  | -3.33682300 | 1.30223000  |
| H | 2.27045600  | -3.72361000 | 2.23946500  |
| C | 2.63387100  | -3.35957200 | -1.10925500 |
| H | 2.24910500  | -3.73155000 | -2.05518200 |
| C | 3.65971200  | -2.36836400 | 1.29012100  |
| C | -0.19357900 | -6.59326500 | 1.01831600  |
| H | -0.49788500 | -6.73158500 | -0.03227300 |
| C | 1.13118400  | -4.91293500 | 0.09535200  |
| H | 0.76424800  | -5.21279300 | -0.89855800 |
| C | 4.20109600  | -1.91365500 | -2.41659800 |
| H | 4.92901000  | -1.09040500 | -2.34557000 |
| C | 6.07500100  | 1.44362500  | 5.33681400  |
| H | 5.53461600  | 1.00773600  | 6.18250700  |
| H | 7.13066900  | 1.16414000  | 5.40858700  |
| H | 5.99675500  | 2.53148500  | 5.40892500  |
| C | 0.48842300  | -7.86059200 | 1.53059500  |
| H | 0.78581800  | -7.73183100 | 2.57564200  |
| H | -0.18627500 | -8.71893700 | 1.45719300  |
| H | 1.38706500  | -8.07241100 | 0.94554200  |
| C | -7.18865600 | -0.79521800 | -3.73780600 |
| H | -7.60349800 | 0.08449400  | -3.23661400 |
| H | -7.50208400 | -0.78565600 | -4.78615900 |
| H | -7.60258700 | -1.68631000 | -3.25875200 |

|   |             |             |             |
|---|-------------|-------------|-------------|
| C | 0.79942300  | 7.43920500  | -3.17087900 |
| H | -0.27862600 | 7.62561900  | -3.15379300 |
| H | 1.32167800  | 8.35571600  | -2.87989700 |
| H | 1.08431200  | 7.18635700  | -4.19551200 |
| C | -5.46864100 | 0.98822300  | 5.79998700  |
| H | -5.07381100 | 0.17337300  | 6.41423900  |
| H | -5.76504700 | 1.81322100  | 6.45487000  |
| H | -6.35644700 | 0.62136700  | 5.27824000  |
| H | -3.49846500 | 2.77630900  | 6.20620000  |
| H | 6.64172100  | -0.84428900 | 4.03420500  |
| H | -5.42589900 | 0.44625700  | -5.35971400 |
| H | -2.09022500 | -7.18669000 | 1.82116200  |
| H | 1.24102700  | 7.59423400  | -0.52215300 |
| H | 3.91366600  | -1.13768400 | -6.62943200 |
| C | 5.36006900  | -3.02867800 | -5.34972600 |
| H | 5.83339700  | -2.68290700 | -6.27376500 |
| H | 6.14213300  | -3.34922400 | -4.65658700 |
| H | 4.73072500  | -3.89446300 | -5.57647800 |
| C | -1.30665600 | -0.55224800 | -1.02083400 |
| C | -1.68183400 | 1.35702400  | -0.12863300 |
| C | 0.71979200  | -0.66705800 | 0.21203700  |
| C | 0.07931600  | -0.57088300 | -1.03101900 |
| C | -0.97676900 | 1.04309700  | 1.02014700  |
| H | 1.79957000  | -0.58730800 | 0.27616600  |
| H | 0.61638900  | -0.11866700 | -1.86108700 |

|   |             |             |             |
|---|-------------|-------------|-------------|
| H | -1.52973900 | 0.65725100  | 1.89268500  |
| O | 0.30139400  | 0.91998900  | 1.00822700  |
| H | 0.27655400  | -1.30582600 | 0.97369800  |
| H | -1.82390900 | -1.11730500 | -0.25230800 |
| H | -1.17367500 | 1.89292400  | -0.92283200 |
| H | -2.76519100 | 1.45043500  | -0.08803000 |
| H | -1.88707800 | -0.38867900 | -1.92766400 |

**Product**

0 1

|   |             |             |             |
|---|-------------|-------------|-------------|
| N | 2.69355600  | -5.11374000 | -1.00424900 |
| N | -3.53757800 | -1.05738100 | -4.24220900 |
| N | -2.00401400 | -4.16082400 | 3.28620500  |
| N | -3.87422300 | 4.14368100  | -0.51465100 |
| N | -3.18329100 | 4.20899600  | 2.30027400  |
| N | -3.25378800 | -3.64040400 | -2.96402400 |
| N | 1.06964500  | 3.37660600  | -4.51354100 |
| C | -0.24096000 | -4.37286500 | 1.02110100  |
| H | 0.18482700  | -4.52858100 | 2.00942400  |
| C | -4.40762400 | 4.75944100  | 1.76024800  |
| H | -5.22882300 | 4.02492800  | 1.73397500  |
| N | 2.60768500  | 2.51956800  | 4.56245700  |
| C | -2.00300500 | -3.78515700 | -2.81919100 |
| H | -1.31224100 | -3.80200200 | -3.67692700 |
| N | -2.26722000 | -1.62823400 | 4.74957300  |
| C | -1.38922400 | -3.96598800 | -1.48910100 |

|   |             |             |             |
|---|-------------|-------------|-------------|
| C | -2.41912200 | -3.83896000 | 2.13299400  |
| H | -3.42181900 | -3.41936600 | 1.96150800  |
| C | -1.59235700 | -4.01790100 | 0.92423400  |
| C | 1.95731200  | -4.88599300 | 0.00223300  |
| H | 2.33891100  | -4.96349400 | 1.03234000  |
| C | 1.62753000  | 3.01818000  | 3.93172400  |
| H | 1.67921100  | 4.01432000  | 3.46484500  |
| C | -2.16016200 | -3.81690400 | -0.32736800 |
| H | -3.20361900 | -3.52949200 | -0.42495000 |
| C | -0.04438500 | -4.30289900 | -1.38328900 |
| H | 0.57662100  | -4.42023100 | -2.26779300 |
| C | 0.53539200  | -4.51254900 | -0.12392100 |
| C | -1.18187700 | 3.14773300  | -2.73844800 |
| H | -0.55011000 | 4.02779100  | -2.64677700 |
| C | -3.68909000 | -0.26390600 | -3.26530200 |
| H | -4.51892800 | -0.36947000 | -2.54840000 |
| C | -0.81863300 | 2.15617600  | -3.66056400 |
| C | -0.75321400 | 2.95555700  | 3.23387400  |
| H | -0.68288700 | 3.98613900  | 2.89475800  |
| C | 0.38352100  | 2.31063000  | -4.50205500 |
| H | 0.63498900  | 1.44821000  | -5.13909900 |
| C | 0.34279300  | 2.30674100  | 3.78986300  |
| C | -3.13485500 | 1.87131600  | -2.12722000 |
| H | -4.03692200 | 1.78629400  | -1.52556200 |
| C | -3.16532600 | 2.96432900  | 2.54350600  |

|   |             |             |             |
|---|-------------|-------------|-------------|
| H | -4.03964700 | 2.31888700  | 2.36761300  |
| C | 0.21397300  | 0.97885400  | 4.22712400  |
| H | 1.08098400  | 0.49297000  | 4.66763100  |
| C | -3.76466100 | -3.46475600 | -4.30451700 |
| H | -2.97412900 | -3.49707700 | -5.07217700 |
| C | -1.14240200 | -1.05233900 | 4.65153500  |
| H | -0.21271200 | -1.52534600 | 5.00612900  |
| C | -1.62175400 | 1.03286900  | -3.80954300 |
| H | -1.37393200 | 0.25874700  | -4.53134700 |
| C | -2.90358200 | -3.94266700 | 4.39800200  |
| H | -3.89336500 | -3.57660800 | 4.07914100  |
| C | -4.17315200 | 5.28026500  | 0.33857600  |
| H | -3.32801700 | 5.98749100  | 0.37276700  |
| C | 2.22305200  | 3.41807400  | -5.38574500 |
| H | 2.33392700  | 2.50125300  | -5.98741600 |
| C | -1.98091100 | 2.28775300  | 3.10545700  |
| N | 4.81201600  | -3.14497400 | -0.81295300 |
| C | -2.73328100 | 4.10375100  | -1.06473100 |
| H | -1.98612200 | 4.89916200  | -0.91762500 |
| C | -2.33538700 | 3.01342000  | -1.97687900 |
| C | -4.50465600 | -2.12791100 | -4.40830900 |
| H | -5.26788400 | -2.10408600 | -3.61320600 |
| C | -1.00059900 | 0.31585300  | 4.11624100  |
| C | -2.09613400 | 0.97559500  | 3.54238300  |
| H | -3.03575100 | 0.43927500  | 3.44999800  |

|   |             |             |             |
|---|-------------|-------------|-------------|
| C | -2.79015400 | 0.88833700  | -3.04805600 |
| C | -2.30377900 | -2.93585000 | 5.38171400  |
| H | -1.29026300 | -3.28201600 | 5.64415100  |
| C | 4.07636800  | -5.48187100 | -0.75757000 |
| H | 4.30469400  | -5.47796600 | 0.32111500  |
| N | 4.70291400  | 2.29525400  | 2.60178600  |
| C | 4.97532400  | -4.44271000 | -1.43337600 |
| H | 4.74905900  | -4.42791100 | -2.51211200 |
| N | 3.68736900  | 2.46254800  | -3.71682800 |
| C | 4.32745200  | 0.79593000  | 0.76032800  |
| C | 4.40666800  | -2.19508800 | -1.54825900 |
| H | 4.18842000  | -2.33996400 | -2.61803200 |
| C | 3.82919300  | 3.29049100  | 4.62605100  |
| H | 3.74949400  | 4.25951100  | 4.10654500  |
| C | 4.40766700  | -0.51732200 | 0.31351800  |
| H | 4.62482500  | -1.33064100 | 1.00133700  |
| C | 3.89753000  | 1.53751900  | -1.50532000 |
| C | 4.98335200  | 2.49090500  | 4.01316900  |
| H | 5.04385400  | 1.52707800  | 4.54514600  |
| C | 3.98169500  | 0.20961900  | -1.94649500 |
| H | 3.86294400  | 0.00648300  | -3.00785000 |
| C | 4.06515900  | 1.82306000  | -0.15639600 |
| H | 4.01807400  | 2.84543100  | 0.20995200  |
| C | 4.24214700  | -0.81644700 | -1.04644700 |
| C | 3.49880900  | 3.62660000  | -4.56426700 |

|   |             |             |             |
|---|-------------|-------------|-------------|
| H | 3.36721900  | 4.54127500  | -3.96288800 |
| C | 3.68219100  | 2.64083300  | -2.46163700 |
| H | 3.54246800  | 3.63803600  | -2.01541400 |
| C | 4.57735200  | 1.10543900  | 2.18257300  |
| H | 4.67641100  | 0.23684600  | 2.85202900  |
| C | 4.33048200  | -6.87120800 | -1.33696600 |
| H | 4.10427100  | -6.87931200 | -2.40739900 |
| H | 5.37472300  | -7.16507400 | -1.19328200 |
| H | 3.69040000  | -7.61069300 | -0.84890700 |
| C | 4.71172900  | 3.77574500  | -5.47880500 |
| H | 4.84378800  | 2.87046200  | -6.07878000 |
| H | 4.58636700  | 4.63075400  | -6.15011800 |
| H | 5.61877300  | 3.92709300  | -4.88799900 |
| C | -5.41938600 | 5.98343200  | -0.19243100 |
| H | -6.26161400 | 5.28567500  | -0.22018800 |
| H | -5.68373800 | 6.83279800  | 0.44476900  |
| H | -5.24814700 | 6.35007100  | -1.20785900 |
| C | -3.16036100 | -2.83966400 | 6.64265600  |
| H | -4.16989300 | -2.50434400 | 6.38658400  |
| H | -3.22542100 | -3.81213600 | 7.14014200  |
| H | -2.73023600 | -2.11816900 | 7.34219600  |
| C | -5.16991200 | -1.98114800 | -5.77434400 |
| H | -4.41498300 | -2.01045800 | -6.56568400 |
| H | -5.88989400 | -2.78805900 | -5.94122300 |
| H | -5.69617300 | -1.02554200 | -5.84216600 |

|   |             |             |             |
|---|-------------|-------------|-------------|
| H | -4.48089600 | -4.27048200 | -4.50678600 |
| H | 6.01906000  | -4.75321300 | -1.30149700 |
| H | -4.71356000 | 5.60294800  | 2.39064700  |
| H | 2.10815800  | 4.27030200  | -6.06642100 |
| H | -3.03723800 | -4.89715100 | 4.92180200  |
| H | 4.06434800  | 3.47884700  | 5.68079600  |
| C | 6.30143500  | 3.24723000  | 4.15561400  |
| H | 6.52620500  | 3.43635000  | 5.20974400  |
| H | 7.12218600  | 2.66924300  | 3.72307500  |
| H | 6.24454100  | 4.20419800  | 3.62839400  |
| C | 0.46419200  | 0.74190900  | -0.71325100 |
| C | -4.00871600 | -0.69408700 | 0.94065100  |
| C | -0.41673200 | -0.98520800 | 0.84602000  |
| C | 0.00310700  | 0.41024700  | 0.48978800  |
| C | -2.73313800 | -0.68001500 | 0.55361000  |
| H | 0.21802500  | -1.39608000 | 1.63825500  |
| H | -0.07624000 | 1.15081800  | 1.28474400  |
| H | -2.42293300 | -0.37998600 | -0.44842500 |
| O | -1.73459900 | -1.03926700 | 1.39286900  |
| H | -0.34626900 | -1.64780900 | -0.02827600 |
| H | 0.54105500  | 0.00827000  | -1.51380900 |
| H | -4.28128800 | -0.99643800 | 1.94740800  |
| H | -4.79084700 | -0.40726400 | 0.24897400  |
| H | 0.79165700  | 1.75044400  | -0.94728500 |

## 8. [2+4] cycloaddition reaction



**Without CC2 cage**

**Reactant**

0 1

|   |             |             |             |
|---|-------------|-------------|-------------|
| C | -2.60255000 | -0.25584400 | 0.24244100  |
| C | -2.05360900 | 0.61732200  | -0.59438900 |
| C | 1.13834400  | 1.43728900  | 0.54746900  |
| C | 1.81960100  | 0.56522000  | -0.19875700 |
| C | 1.40072900  | -0.82242300 | -0.45730900 |
| C | 0.69020800  | -1.57202200 | 0.38838600  |
| H | -3.50867400 | -0.02877500 | 0.79689400  |
| H | -2.48835400 | 1.59911600  | -0.76095400 |
| H | 1.51042300  | 2.44219100  | 0.71933800  |
| H | 2.74648300  | 0.88397600  | -0.67345100 |
| H | 1.71842200  | -1.25336500 | -1.40589200 |
| H | 0.39690500  | -1.19861000 | 1.36600700  |
| H | 0.39352400  | -2.58503500 | 0.13537700  |
| H | 0.18169000  | 1.17710900  | 0.99320100  |
| H | -1.14233200 | 0.38378400  | -1.13799700 |
| H | -2.16442800 | -1.23764700 | 0.40042900  |

**TS**

0 1

|   |             |             |             |
|---|-------------|-------------|-------------|
| C | 1.56806200  | 0.68819300  | -0.23071000 |
| C | 1.56806600  | -0.68819100 | -0.23070300 |
| C | -0.45053300 | -1.42336600 | 0.49867900  |
| C | -1.30999600 | -0.70489300 | -0.29634500 |

|   |             |             |             |
|---|-------------|-------------|-------------|
| C | -1.30999600 | 0.70489400  | -0.29634300 |
| C | -0.45053200 | 1.42336400  | 0.49868300  |
| H | 2.05662200  | 1.23378900  | 0.57069000  |
| H | 2.05662700  | -1.23377700 | 0.57070400  |
| H | -0.38456200 | -2.50307200 | 0.39836600  |
| H | -1.84187000 | -1.21878400 | -1.09368200 |
| H | -1.84187000 | 1.21878700  | -1.09367900 |
| H | -0.11884000 | 1.03233800  | 1.45374100  |
| H | -0.38456100 | 2.50307100  | 0.39837300  |
| H | -0.11884100 | -1.03234300 | 1.45373900  |
| H | 1.44343800  | -1.23293400 | -1.15890700 |
| H | 1.44342900  | 1.23292500  | -1.15891800 |

**Product**

0 1

|   |             |             |             |
|---|-------------|-------------|-------------|
| C | -1.21009500 | -0.77388500 | -0.20430900 |
| C | -1.20964300 | 0.77459100  | -0.20431000 |
| C | 0.09050400  | 1.37966400  | 0.36518300  |
| C | 1.29512000  | 0.66612100  | -0.18990100 |
| C | 1.29473200  | -0.66687500 | -0.18990100 |
| C | 0.08970000  | -1.37971700 | 0.36518200  |
| H | -2.06413300 | -1.15838900 | 0.36286000  |
| H | -2.06345700 | 1.15959200  | 0.36285900  |
| H | 0.12624800  | 2.45293300  | 0.15772800  |
| H | 2.13493300  | 1.23761200  | -0.57654000 |
| H | 2.13421200  | -1.23885500 | -0.57654100 |

|   |             |             |             |
|---|-------------|-------------|-------------|
| H | 0.08159100  | -1.27416900 | 1.46012300  |
| H | 0.12481800  | -2.45300700 | 0.15772600  |
| H | 0.08233400  | 1.27411800  | 1.46012500  |
| H | -1.32889800 | 1.13649200  | -1.23000000 |
| H | -1.32956200 | -1.13571700 | -1.22999900 |

**With CC2 cage**

**Reactant**

0 1

|   |             |             |             |
|---|-------------|-------------|-------------|
| N | 2.83138700  | 2.03968100  | 4.37800200  |
| N | -4.73163200 | -0.33908000 | 3.23235600  |
| N | -0.06590500 | 5.75907400  | 0.05271400  |
| N | -4.71829900 | -1.68146600 | -3.04065300 |
| N | -3.04141700 | -0.30467200 | -4.93107000 |
| N | -3.59209300 | 2.18088400  | 4.04444900  |
| N | -1.42478500 | -5.35796200 | 1.06876600  |
| C | 0.73510700  | 3.81022900  | 1.98976000  |
| H | 1.51474800  | 4.30931100  | 1.42064500  |
| C | -4.45221600 | -0.53793600 | -5.15021100 |
| H | -5.08264900 | 0.28180300  | -4.76878700 |
| N | 3.34211700  | -0.01229700 | -4.58129500 |
| C | -2.36913000 | 1.87815500  | 4.18543200  |
| H | -2.03619600 | 1.11340300  | 4.90501000  |
| N | -0.19340000 | 4.97923600  | -2.72835000 |
| C | -1.30089800 | 2.53971900  | 3.41262400  |
| C | -0.94338300 | 5.02244200  | 0.59478600  |

|   |             |             |             |
|---|-------------|-------------|-------------|
| H | -2.00525100 | 5.06727800  | 0.30602000  |
| C | -0.60385500 | 4.06707800  | 1.66667600  |
| C | 2.47283500  | 2.72880500  | 3.37554200  |
| H | 3.20041600  | 3.23556200  | 2.72346600  |
| C | 2.12931100  | -0.37593900 | -4.52129700 |
| H | 1.80704400  | -1.38517300 | -4.82213800 |
| C | -1.61477300 | 3.43113800  | 2.37691100  |
| H | -2.66199300 | 3.61590200  | 2.15033900  |
| C | 0.03057200  | 2.29245600  | 3.72607300  |
| H | 0.29917400  | 1.61013100  | 4.52893000  |
| C | 1.05566500  | 2.93397900  | 3.01922200  |
| C | -2.79170400 | -3.28165600 | -0.39843100 |
| H | -2.31592500 | -4.06732500 | -0.98009100 |
| C | -4.73494100 | -0.30968700 | 1.96470000  |
| H | -5.29503000 | 0.45309900  | 1.40120000  |
| C | -2.57015100 | -3.24422200 | 0.98455700  |
| C | -0.27271400 | 0.18461000  | -4.31068400 |
| H | -0.53098900 | -0.77860400 | -4.74370700 |
| C | -1.77702800 | -4.29150000 | 1.65772900  |
| H | -1.55802700 | -4.11266500 | 2.72203700  |
| C | 1.05323900  | 0.54139000  | -4.09779400 |
| C | -4.24774400 | -1.36723400 | -0.22151000 |
| H | -4.90775800 | -0.65453800 | -0.70985500 |
| C | -2.71429400 | 0.73381600  | -4.28161700 |
| H | -3.46444800 | 1.45121200  | -3.91246700 |

|   |             |             |             |
|---|-------------|-------------|-------------|
| C | 1.35314100  | 1.79862400  | -3.55392100 |
| H | 2.39719200  | 2.06336300  | -3.40447800 |
| C | -4.55553900 | 1.45677300  | 4.84346400  |
| H | -4.08129100 | 0.75634800  | 5.55024700  |
| C | 0.67043800  | 4.05263400  | -2.77568200 |
| H | 1.72436300  | 4.22036800  | -2.50313100 |
| C | -3.17856900 | -2.25593400 | 1.74810700  |
| H | -3.03058500 | -2.21173000 | 2.82424900  |
| C | -0.49044200 | 6.64911600  | -1.00377400 |
| H | -1.57698200 | 6.61067900  | -1.18577500 |
| C | -4.88125200 | -1.84458100 | -4.47378500 |
| H | -4.23656200 | -2.65125600 | -4.86030000 |
| C | -0.72273500 | -6.35237700 | 1.85198600  |
| H | -0.62521700 | -6.06696200 | 2.91218100  |
| C | -1.30686300 | 1.07931900  | -4.00242200 |
| N | 4.52570000  | -0.05258600 | 3.28776200  |
| C | -3.87413500 | -2.42503500 | -2.45539800 |
| H | -3.28688200 | -3.18024900 | -3.00101600 |
| C | -3.62813100 | -2.35057900 | -1.00300600 |
| C | -5.50444100 | 0.67086700  | 3.93375000  |
| H | -5.96458000 | 1.38288800  | 3.22877000  |
| C | 0.33518500  | 2.69497900  | -3.25108900 |
| C | -0.99858400 | 2.32607200  | -3.47276100 |
| H | -1.78068400 | 3.04495700  | -3.24163900 |
| C | -4.02775100 | -1.31605200 | 1.14930400  |

|   |            |             |             |
|---|------------|-------------|-------------|
| C | 0.24334700 | 6.29674600  | -2.30179400 |
| H | 1.32492200 | 6.30997400  | -2.08859600 |
| C | 4.25474400 | 1.95854500  | 4.65573800  |
| H | 4.84096500 | 2.49411600  | 3.89032200  |
| N | 4.69114200 | -1.89557700 | -2.84256500 |
| C | 4.67508000 | 0.48827100  | 4.62178200  |
| H | 4.09149700 | -0.06867000 | 5.37291000  |
| N | 1.45694900 | -5.39572600 | 1.47561900  |
| C | 4.00846400 | -1.83891200 | -0.53961200 |
| C | 3.80261200 | -1.08555500 | 3.15289400  |
| H | 3.29728600 | -1.55942200 | 4.00955900  |
| C | 4.30947300 | -0.98257300 | -5.04584400 |
| H | 3.84664000 | -1.93979800 | -5.33660400 |
| C | 4.18150700 | -1.21065000 | 0.68675300  |
| H | 4.76458000 | -0.29788900 | 0.76617200  |
| C | 2.67876000 | -3.55595600 | 0.53375200  |
| C | 5.35625400 | -1.24964100 | -3.95993700 |
| H | 5.78647300 | -0.27916900 | -3.66255600 |
| C | 2.85925200 | -2.91375300 | 1.76697600  |
| H | 2.39894500 | -3.34936600 | 2.65031600  |
| C | 3.25011800 | -3.01585500 | -0.61214000 |
| H | 3.12641900 | -3.49589200 | -1.57964100 |
| C | 3.60622400 | -1.74497500 | 1.84784800  |
| C | 0.67705700 | -6.60417700 | 1.28423700  |
| H | 0.57121800 | -6.84880800 | 0.21434900  |

|   |             |             |             |
|---|-------------|-------------|-------------|
| C | 1.88673700  | -4.79744300 | 0.44461400  |
| H | 1.69912200  | -5.17572900 | -0.57226800 |
| C | 4.64726400  | -1.26866300 | -1.74154400 |
| H | 5.09526200  | -0.27132100 | -1.61380700 |
| C | 4.52346700  | 2.56337200  | 6.03163500  |
| H | 3.94309700  | 2.03555600  | 6.79433600  |
| H | 5.58605800  | 2.49414500  | 6.28406400  |
| H | 4.22924100  | 3.61589900  | 6.04902900  |
| C | 1.35769800  | -7.75672800 | 2.01774000  |
| H | 1.45560100  | -7.51969300 | 3.08138200  |
| H | 0.77733100  | -8.67832500 | 1.91209700  |
| H | 2.35910900  | -7.92781500 | 1.61435000  |
| C | -6.34373600 | -2.15610300 | -4.77843500 |
| H | -6.98549500 | -1.35536200 | -4.39901100 |
| H | -6.50144400 | -2.25590500 | -5.85670100 |
| H | -6.64358300 | -3.08946200 | -4.29505600 |
| C | -0.08395400 | 7.30403500  | -3.40075400 |
| H | -1.15823300 | 7.29881200  | -3.60790200 |
| H | 0.21440200  | 8.31317300  | -3.10069000 |
| H | 0.44101100  | 7.04582900  | -4.32406400 |
| C | -6.58977600 | -0.02074000 | 4.75511400  |
| H | -6.13733400 | -0.73059300 | 5.45397400  |
| H | -7.17155100 | 0.71267900  | 5.32182700  |
| H | -7.26897000 | -0.57378400 | 4.10117200  |
| H | -5.14638600 | 2.18307600  | 5.41448100  |

|   |             |             |             |
|---|-------------|-------------|-------------|
| H | 5.73642700  | 0.42882600  | 4.89364900  |
| H | -4.62134400 | -0.63573500 | -6.22931400 |
| H | -1.29105000 | -7.28888400 | 1.79512500  |
| H | -0.21895400 | 7.67371200  | -0.72198400 |
| H | 4.82030700  | -0.56246800 | -5.92083400 |
| C | 6.45587400  | -2.16945500 | -4.48290500 |
| H | 6.96199400  | -1.71776600 | -5.34154400 |
| H | 7.19717700  | -2.35969800 | -3.70253500 |
| H | 6.02945300  | -3.12981700 | -4.78773300 |
| C | 2.57831500  | 1.67920100  | 0.16360900  |
| C | 3.70501600  | 2.30821600  | -0.15878700 |
| C | 0.05217200  | -0.65016100 | 1.93950000  |
| C | 0.31112900  | -0.74584300 | 0.63291900  |
| C | -0.64153100 | -0.37350900 | -0.42561800 |
| C | -1.51511200 | 0.63068100  | -0.32003400 |
| H | 2.49480600  | 1.10319100  | 1.08351000  |
| H | 4.57788400  | 2.26877800  | 0.48993900  |
| H | 0.80427600  | -0.89197100 | 2.68611600  |
| H | 1.28363900  | -1.11517500 | 0.30673400  |
| H | -0.60262600 | -0.94915700 | -1.35015700 |
| H | -1.54425600 | 1.26236900  | 0.56580400  |
| H | -2.21911600 | 0.85107100  | -1.11730100 |
| H | -0.92348100 | -0.32710200 | 2.29782300  |
| H | 3.80386200  | 2.88583100  | -1.07433200 |
| H | 1.69052400  | 1.70629900  | -0.46595800 |



## TS

0 1

|   |             |             |             |
|---|-------------|-------------|-------------|
| N | 2.64053400  | -3.63792900 | 3.81369900  |
| N | -5.10469200 | -1.22259100 | 2.56491600  |
| N | 2.14387200  | 2.73681800  | 4.59211700  |
| N | -4.26476200 | 3.03467300  | -2.19492000 |
| N | -1.77787600 | 4.65588600  | -2.55426600 |
| N | -3.13298100 | -0.94855700 | 4.73359300  |
| N | -3.49597700 | -3.24312100 | -3.32229200 |
| C | 1.84520100  | -0.11017300 | 4.25841900  |
| H | 2.84905600  | 0.30464200  | 4.21330100  |
| C | -3.13553400 | 5.16378100  | -2.58966800 |
| H | -3.48347700 | 5.50435000  | -1.60080900 |
| N | 4.21257400  | 2.39314500  | -3.30445400 |
| C | -2.12657500 | -1.66578400 | 4.44996200  |
| H | -2.21339200 | -2.75099400 | 4.28319400  |
| N | 2.30991000  | 4.73493100  | 2.38853200  |
| C | -0.75884100 | -1.11554400 | 4.35820800  |
| C | 0.98622700  | 2.22156200  | 4.56462000  |
| H | 0.07304900  | 2.83262300  | 4.64109600  |
| C | 0.76811400  | 0.76594000  | 4.44724500  |
| C | 2.77193000  | -2.37957200 | 3.89498000  |
| H | 3.75546700  | -1.89029200 | 3.81760500  |
| C | 2.99724100  | 2.74698300  | -3.37408500 |
| H | 2.40388600  | 2.61692900  | -4.29304100 |

|   |             |             |             |
|---|-------------|-------------|-------------|
| C | -0.52403000 | 0.25890700  | 4.50604000  |
| H | -1.37592900 | 0.91684900  | 4.66074400  |
| C | 0.31544000  | -1.97355800 | 4.15315200  |
| H | 0.16329200  | -3.04310700 | 4.03254000  |
| C | 1.62538100  | -1.47440600 | 4.10799600  |
| C | -4.00481800 | -0.58983800 | -2.33910600 |
| H | -3.70072100 | -0.69691100 | -3.37696900 |
| C | -5.06002400 | -0.22872400 | 1.77889200  |
| H | -5.26636400 | 0.79686200  | 2.12390600  |
| C | -4.03662200 | -1.73404300 | -1.52971900 |
| C | 0.99396300  | 3.84269900  | -2.41853900 |
| H | 0.48796100  | 3.73562600  | -3.37522100 |
| C | -3.71074100 | -3.06154600 | -2.08631500 |
| H | -3.68623600 | -3.89068600 | -1.36180000 |
| C | 2.28981800  | 3.37595100  | -2.24240400 |
| C | -4.70332000 | 0.75909100  | -0.46736900 |
| H | -4.94214700 | 1.74241900  | -0.06908100 |
| C | -1.09851800 | 4.87989500  | -1.50614700 |
| H | -1.52819900 | 5.40023900  | -0.63527600 |
| C | 2.90698200  | 3.50417700  | -0.98933000 |
| H | 3.91371900  | 3.11339400  | -0.86369000 |
| C | -4.41355400 | -1.61352000 | 4.85739800  |
| H | -4.35544100 | -2.69018100 | 4.62786900  |
| C | 2.88150500  | 4.20059000  | 1.39110600  |
| H | 3.89410500  | 3.77287700  | 1.45834600  |

|   |             |             |             |
|---|-------------|-------------|-------------|
| C | -4.38295500 | -1.61516600 | -0.18981600 |
| H | -4.39821100 | -2.48323600 | 0.46429300  |
| C | 2.23289200  | 4.17278400  | 4.75408100  |
| H | 1.24424100  | 4.65904700  | 4.78942800  |
| C | -4.12196200 | 4.13262600  | -3.13831400 |
| H | -3.73543600 | 3.77519700  | -4.10696100 |
| C | -3.21088400 | -4.59096200 | -3.76354600 |
| H | -3.22164900 | -5.32168400 | -2.93817500 |
| C | 0.30564200  | 4.45122700  | -1.35906900 |
| N | 3.62083000  | -4.42894700 | 1.18320800  |
| C | -4.16601100 | 1.85609500  | -2.65436100 |
| H | -3.93142400 | 1.66382900  | -3.71315500 |
| C | -4.32191000 | 0.65468400  | -1.81212300 |
| C | -5.46628900 | -0.97391800 | 3.94985700  |
| H | -5.49555100 | 0.10653600  | 4.16742400  |
| C | 2.23854200  | 4.11257800  | 0.06522800  |
| C | 0.94207400  | 4.60936200  | -0.13533900 |
| H | 0.43587500  | 5.08460300  | 0.70177400  |
| C | -4.72247400 | -0.36531700 | 0.34851200  |
| C | 3.05579100  | 4.81191000  | 3.63348300  |
| H | 4.01176400  | 4.26753000  | 3.56109400  |
| C | 3.84296900  | -4.43104300 | 3.62587200  |
| H | 4.72896300  | -3.78809600 | 3.49440900  |
| N | 4.24278700  | -0.47672300 | -3.85655800 |
| C | 3.67843600  | -5.27305900 | 2.35778900  |

|   |             |             |             |
|---|-------------|-------------|-------------|
| H | 2.78407400  | -5.90799300 | 2.46775700  |
| N | -0.80431200 | -4.43710600 | -3.47771300 |
| C | 3.23071700  | -2.05282700 | -2.34313100 |
| C | 2.58657400  | -4.51162700 | 0.45472300  |
| H | 1.75773400  | -5.19577800 | 0.69488000  |
| C | 4.80397200  | 1.79946100  | -4.48396400 |
| H | 4.09268100  | 1.72056500  | -5.32244700 |
| C | 3.38050400  | -2.77094500 | -1.16191600 |
| H | 4.24124300  | -2.61465300 | -0.51658600 |
| C | 1.15784900  | -3.22640500 | -2.79015400 |
| C | 5.35357000  | 0.40643400  | -4.16946200 |
| H | 6.04252000  | 0.49923500  | -3.31372800 |
| C | 1.31805500  | -3.94423700 | -1.59697200 |
| H | 0.56471200  | -4.68095200 | -1.32993200 |
| C | 2.11184400  | -2.28461500 | -3.15586900 |
| H | 2.01380600  | -1.71851000 | -4.07873000 |
| C | 2.42284000  | -3.72277200 | -0.78271300 |
| C | -1.85068500 | -4.65592700 | -4.46198300 |
| H | -1.83410200 | -3.87822300 | -5.24322300 |
| C | 0.01085600  | -3.48826000 | -3.68300300 |
| H | -0.07266900 | -2.82492600 | -4.55773200 |
| C | 4.26857100  | -1.08121700 | -2.74246300 |
| H | 5.08475400  | -0.93330700 | -2.01811100 |
| C | 4.03253500  | -5.33123900 | 4.84494200  |
| H | 3.15483600  | -5.97026700 | 4.98063600  |

|   |             |             |             |
|---|-------------|-------------|-------------|
| H | 4.91661000  | -5.96470500 | 4.72418200  |
| H | 4.15673400  | -4.72842000 | 5.74827000  |
| C | -1.63834700 | -6.03017800 | -5.09436900 |
| H | -1.66202000 | -6.80667200 | -4.32383000 |
| H | -2.41804900 | -6.24003100 | -5.83288800 |
| H | -0.66596800 | -6.07491200 | -5.59167700 |
| C | -5.49537400 | 4.77398900  | -3.33830900 |
| H | -5.88941300 | 5.12588100  | -2.37992500 |
| H | -5.43148000 | 5.62206900  | -4.02694400 |
| H | -6.19947300 | 4.04484500  | -3.74754200 |
| C | 3.32203400  | 6.28451700  | 3.94319400  |
| H | 2.37620800  | 6.82861600  | 4.02560900  |
| H | 3.87318500  | 6.38849900  | 4.88277500  |
| H | 3.90846200  | 6.74239600  | 3.14235000  |
| C | -6.83941600 | -1.59071300 | 4.21244900  |
| H | -6.81896100 | -2.66206400 | 3.99090700  |
| H | -7.13337400 | -1.45086300 | 5.25719100  |
| H | -7.59416800 | -1.12596600 | 3.57268000  |
| H | -4.74752700 | -1.50015900 | 5.89664100  |
| H | 4.55653900  | -5.92397800 | 2.26373800  |
| H | -3.14468000 | 6.02609400  | -3.26953800 |
| H | -3.98117500 | -4.87741200 | -4.49045700 |
| H | 2.74730300  | 4.36782300  | 5.70376000  |
| H | 5.64217800  | 2.43356500  | -4.79874600 |
| C | 6.10004600  | -0.16003100 | -5.37570000 |

|   |             |             |             |
|---|-------------|-------------|-------------|
| H | 6.93134600  | 0.49354400  | -5.65716700 |
| H | 6.49868200  | -1.15166100 | -5.14634600 |
| H | 5.42037300  | -0.25545300 | -6.22778400 |
| C | -0.11523000 | 1.72959100  | 1.28173000  |
| C | 0.92897100  | 0.86982500  | 1.04436000  |
| C | 0.34427100  | -0.54270900 | -0.62897200 |
| C | 0.07995300  | 0.34193900  | -1.64436600 |
| C | -0.92599900 | 1.32538500  | -1.52121800 |
| C | -1.67048600 | 1.45400500  | -0.37591300 |
| H | -0.84618600 | 1.49081600  | 2.04911300  |
| H | 1.06407700  | -0.01245200 | 1.66213100  |
| H | 1.19849300  | -1.21015800 | -0.68554900 |
| H | 0.79890700  | 0.43287300  | -2.45877800 |
| H | -0.98479800 | 2.11588800  | -2.26632700 |
| H | -1.90380200 | 0.59195800  | 0.23863900  |
| H | -2.35574000 | 2.29372000  | -0.27508000 |
| H | -0.44164200 | -0.85609200 | 0.05019600  |
| H | 1.80909500  | 1.21725100  | 0.51236900  |
| H | -0.05013700 | 2.77158300  | 1.00030700  |

**Product**

0 1

|   |             |             |             |
|---|-------------|-------------|-------------|
| N | 1.24692200  | 3.75834200  | -4.29732900 |
| N | -5.74240600 | 0.85695100  | -1.10488100 |
| N | 1.00888900  | -2.61506600 | -4.95612400 |
| N | -3.22984300 | -3.32962200 | 3.11794400  |

|   |             |             |             |
|---|-------------|-------------|-------------|
| N | -0.64352800 | -4.79023100 | 2.82651000  |
| N | -4.37579800 | 0.66937900  | -3.68087800 |
| N | -2.60640800 | 2.97492700  | 4.10151900  |
| C | 0.62207500  | 0.17364800  | -4.39189700 |
| H | 1.63311100  | -0.16972200 | -4.59528100 |
| C | -1.91122200 | -5.38337900 | 3.20273200  |
| H | -2.47990200 | -5.75198800 | 2.33352400  |
| N | 5.16585200  | -2.10542000 | 1.98572600  |
| C | -3.38206100 | 1.45658000  | -3.65714000 |
| H | -3.50085300 | 2.53816000  | -3.48665800 |
| N | 1.96848500  | -4.60198300 | -3.01813000 |
| C | -1.99722900 | 1.00020900  | -3.89163300 |
| C | -0.12336600 | -2.20831200 | -4.55598900 |
| H | -0.97017400 | -2.89508800 | -4.40058600 |
| C | -0.40438900 | -0.77798100 | -4.31620500 |
| C | 1.44137800  | 2.50646400  | -4.34402200 |
| H | 2.44519100  | 2.07897000  | -4.49289500 |
| C | 4.03644500  | -2.53344000 | 2.37146100  |
| H | 3.70559500  | -2.44340000 | 3.41810200  |
| C | -1.70614000 | -0.36094000 | -4.06514500 |
| H | -2.52303500 | -1.07653600 | -4.01146400 |
| C | -0.97197500 | 1.93530000  | -3.97668500 |
| H | -1.17123300 | 2.99719900  | -3.85590300 |
| C | 0.34545700  | 1.52493600  | -4.22768800 |
| C | -3.11836000 | 0.30813500  | 3.19175700  |

|   |             |             |             |
|---|-------------|-------------|-------------|
| H | -2.50904500 | 0.43576600  | 4.08250900  |
| C | -5.37834900 | -0.12892700 | -0.39588200 |
| H | -5.57339300 | -1.16925600 | -0.70041200 |
| C | -3.51902900 | 1.45032000  | 2.48575800  |
| C | 1.92087900  | -3.75576600 | 1.96738200  |
| H | 1.68676400  | -3.68940100 | 3.02706800  |
| C | -3.15730200 | 2.79553200  | 2.97397100  |
| H | -3.41635200 | 3.63462000  | 2.30931000  |
| C | 3.08897700  | -3.20083500 | 1.45841100  |
| C | -4.26389600 | -1.08887700 | 1.59682500  |
| H | -4.53922700 | -2.08671600 | 1.26336000  |
| C | -0.26616000 | -4.93494100 | 1.62406300  |
| H | -0.88644600 | -5.45966100 | 0.88000200  |
| C | 3.34912300  | -3.27646000 | 0.08343800  |
| H | 4.26021300  | -2.82283800 | -0.29830500 |
| C | -5.68914900 | 1.25101800  | -3.49395800 |
| H | -5.64718300 | 2.33510800  | -3.29840300 |
| C | 2.72906100  | -3.98019900 | -2.21689700 |
| H | 3.63454200  | -3.45494000 | -2.55867800 |
| C | -4.27331400 | 1.30916400  | 1.32713200  |
| H | -4.57931600 | 2.17629800  | 0.74738000  |
| C | 1.16159100  | -4.02892100 | -5.22579400 |
| H | 0.24910700  | -4.60584800 | -5.00314500 |
| C | -2.78068200 | -4.40353100 | 3.99061000  |
| H | -2.17454500 | -4.01012400 | 4.82342000  |



|   |             |             |             |
|---|-------------|-------------|-------------|
| C | -2.31465000 | 4.33318800  | 4.50310300  |
| H | -2.58714700 | 5.07422800  | 3.73375600  |
| C | 1.01317100  | -4.40198000 | 1.11795700  |
| N | 2.90075000  | 4.61893000  | -2.05775800 |
| C | -3.02396200 | -2.13993000 | 3.50759400  |
| H | -2.48161900 | -1.92091300 | 4.44100000  |
| C | -3.48524000 | -0.95778200 | 2.75449700  |
| C | -6.44074000 | 0.57266000  | -2.34602500 |
| H | -6.46819500 | -0.51065900 | -2.54950700 |
| C | 2.45679900  | -3.91787400 | -0.76743800 |
| C | 1.29356400  | -4.49276500 | -0.23960200 |
| H | 0.60309500  | -4.98381100 | -0.92112800 |
| C | -4.64579700 | 0.03570300  | 0.87420900  |
| C | 2.32551200  | -4.61804300 | -4.42489300 |
| H | 3.21846900  | -4.00120900 | -4.61960400 |
| C | 2.40323700  | 4.62332700  | -4.45665600 |
| H | 3.32618900  | 4.03513200  | -4.59014000 |
| N | 5.17733200  | 0.75658900  | 2.56725100  |
| C | 2.56237600  | 5.46165000  | -3.18501700 |
| H | 1.63649400  | 6.03712800  | -3.02195700 |
| N | -0.05983000 | 4.33079500  | 3.61390000  |
| C | 3.66712000  | 2.22387100  | 1.40121400  |
| C | 2.09958400  | 4.61257300  | -1.07533200 |
| H | 1.18382800  | 5.22416000  | -1.06714900 |
| C | 6.01767000  | -1.48125200 | 2.97479800  |

|   |             |             |             |
|---|-------------|-------------|-------------|
| H | 5.55516800  | -1.44861700 | 3.97496100  |
| C | 3.43301900  | 2.93982500  | 0.23295500  |
| H | 4.09323000  | 2.84273500  | -0.62522900 |
| C | 1.71720600  | 3.24531500  | 2.41484700  |
| C | 6.38165800  | -0.05578100 | 2.55196000  |
| H | 6.81760700  | -0.10401500 | 1.54040000  |
| C | 1.49155300  | 3.96303100  | 1.23200100  |
| H | 0.64315300  | 4.64137700  | 1.19181700  |
| C | 2.79953300  | 2.37769400  | 2.49301000  |
| H | 3.00277100  | 1.81413000  | 3.40029400  |
| C | 2.34136300  | 3.81596900  | 0.14347100  |
| C | -0.82892100 | 4.48654800  | 4.83589600  |
| H | -0.56621200 | 3.71239200  | 5.57562600  |
| C | 0.83809200  | 3.43635700  | 3.58615500  |
| H | 1.03091300  | 2.77362300  | 4.44430500  |
| C | 4.84304900  | 1.33510200  | 1.49003000  |
| H | 5.42691600  | 1.22425200  | 0.56300200  |
| C | 2.18150900  | 5.52338000  | -5.66969500 |
| H | 1.26938200  | 6.11325800  | -5.53872500 |
| H | 3.02729000  | 6.20423100  | -5.80585000 |
| H | 2.06966800  | 4.92178700  | -6.57541500 |
| C | -0.54765200 | 5.87238500  | 5.41316100  |
| H | -0.80943700 | 6.64416600  | 4.68311000  |
| H | -1.12923900 | 6.03588300  | 6.32555000  |
| H | 0.51361100  | 5.97763000  | 5.65288200  |

|   |             |             |             |
|---|-------------|-------------|-------------|
| C | -4.01427700 | -5.11673400 | 4.54374200  |
| H | -4.62049700 | -5.51145700 | 3.72268100  |
| H | -3.72273700 | -5.94424000 | 5.19774700  |
| H | -4.63155000 | -4.42014400 | 5.11691900  |
| C | 2.58980600  | -6.06189800 | -4.84670400 |
| H | 1.70365200  | -6.67622800 | -4.66081000 |
| H | 2.84050500  | -6.11443700 | -5.91056200 |
| H | 3.41991600  | -6.48077300 | -4.27200700 |
| C | -7.86441600 | 1.11679500  | -2.24618300 |
| H | -7.84260000 | 2.19076100  | -2.03799800 |
| H | -8.40994700 | 0.94825100  | -3.17973500 |
| H | -8.40446700 | 0.62415700  | -1.43344600 |
| H | -6.26090100 | 1.08894800  | -4.41656300 |
| H | 3.38729400  | 6.16752300  | -3.34148100 |
| H | -1.69479000 | -6.23771000 | 3.85754100  |
| H | -2.89150200 | 4.54809300  | 5.41145800  |
| H | 1.39051900  | -4.14138700 | -6.29309100 |
| H | 6.94493300  | -2.06411200 | 3.04052400  |
| C | 7.39198200  | 0.55069300  | 3.52339200  |
| H | 8.30579600  | -0.05044000 | 3.55544800  |
| H | 7.65395900  | 1.56663100  | 3.21667000  |
| H | 6.96430100  | 0.59880500  | 4.52932700  |
| C | -1.48220400 | -0.75017000 | -0.50785900 |
| C | -0.19303400 | 0.02556100  | -0.77278200 |
| C | 0.30316800  | 0.66514200  | 0.52587200  |

|   |             |             |             |
|---|-------------|-------------|-------------|
| C | 0.26290500  | -0.30626400 | 1.67676900  |
| C | -0.39400500 | -1.46762900 | 1.63433500  |
| C | -1.19752300 | -1.91482900 | 0.43954800  |
| H | -2.21065000 | -0.07138600 | -0.04737900 |
| H | -0.34601800 | 0.79249100  | -1.53907500 |
| H | 1.32326800  | 1.04788500  | 0.39990100  |
| H | 0.80903800  | -0.02758300 | 2.57835000  |
| H | -0.36945900 | -2.13936400 | 2.49255700  |
| H | -2.12359200 | -2.39524400 | 0.78064500  |
| H | -0.64067000 | -2.68930100 | -0.10569600 |
| H | -0.31638800 | 1.54165300  | 0.77351300  |
| H | 0.57207700  | -0.66554400 | -1.15416500 |
| H | -1.92504300 | -1.11425800 | -1.44207400 |
